# Supplementary material for: Estrogen Receptor Alpha Dynamics and Plasticity During Endocrine Resistance
Source: Research Square preprint supplement (doi:10.21203/rs.3.rs-6295413/v1), 2025-04-30
Supplement: Supplementary file 1 [file 6abcccdce17a5899f94f54ff.docx]

| Sl no: | Name of the drug | Mechanism of action | Working concentration |
| --- | --- | --- | --- |
|  | 4OH Tamoxifen | Blocks the effects of estrogen on hormone receptor-positive breast cancer cells by attaching to the estrogen receptors on the cells. | 4 µM |
|  | Bafilomycin | Interacts with the proton pump V-ATPase, inhibiting lysosomal acidification by preventing the passage of protons into the lysosomal lumen. | 5 nM |
|  | Camptothecin | Camptothecin complexes with type I DNA topoisomerase, inhibit both cleavage and religation reactions of DNA replication | 1 µM |
|  | Chloroquine | Blocks the autophagic flux through the same mechanism as bafilomycin, which increases lysosomal pH and thus inhibits the activity of resident hydrolases. | 50 µM |
|  | Cisplatin | It acts via non-cell cycle-specific cytotoxicity, which is achieved through the covalent binding of platinum to the purine bases guanine and adenine | 50 µg/ml |
|  | cycloheximide | Blocks eukaryotic [translational elongation](https://en.wikipedia.org/wiki/Translation_(genetics)) by interfering with the translocation step in protein synthesis | 250 µg/ml |
|  | Endoxifen | It exerts an antiestrogenic effect in the breast by inhibiting ERα signaling. | 1 µM |
|  | Etoposide | Inhibits DNA synthesis by forming a complex with topoisomerase II and DNA synthesis. | 50 µM |
|  | MG132 | MG-132 reduces the degradation of ubiquitin-conjugated proteins in mammalian cells by the 26S proteasome. | 10 nM |
|  | Paclitaxel | It works by interfering with the normal function of microtubules during cell division. | 2 µM |
