# Supplementary material for: Estrogen Receptor Alpha Dynamics and Plasticity During Endocrine Resistance
Source: Research Square preprint supplement (doi:10.21203/rs.3.rs-6295413/v1), 2025-04-30
Supplement: Supplementary file 2 [file 9d1bb120a86538cf8e652a52.docx]

| **Sl No:** | **Antibody** | **Catalog no:** | **Dilution** |
| --- | --- | --- | --- |
| 1 | ER-α | #8644(CST) | 1:1000 for WB, 1:100 for ICC. |
| 2 | β-actin | #A2228(Sigma) | 1:1000 |
| 3 | Anti Mouse IgG | #A9044(Sigma) | 1:10000 |
| 4 | Anti Rabbit IgG | #AP307P(Sigma) | 1:10000 |
| 5 | Goat anti-Rabbit IgG Alexa Flour 647 | A-21245 (Invitrogen) | 1:100 |

**Table ST1** List of antibodies used and dilution

**Table ST2** List of Primers and Sequences

| **SLNo:** | **Gene** | **Primer Sequence** |
| --- | --- | --- |
| 1 | ESR-1(ER α) | Forward 5′-CCACCAACCAGTGCACCATT-3′  Reverse 5′-GGTCTTTTCGTATCCCACCTTTC-3′ |
| 2 | GAPDH | Forward 5′-CACCAGGGCTGCTTTTAACTCTGGTA-3′  Reverse 5′-CCTTGACGGTGCCATGGAATTTGC-3′ |
| 3 | NQO1 | Forward 5′-CTACACGTATGCCACCATGT-3′  Reverse 5′-ATTGGCCAGAGAATGACGTT-3′ |
| 4 | SOD3 | Forward 5′-ACGCTGGCGAGGACGACCTG-3′  Reverse 5′- GCTTCTTGCGCTCTGAGTGCTC-3′ |
| 5 | IDH1 | Forward 5′-CTATGATGGTGACGTGCAGTCG-3′  Forward 5′-CCTCTGCTTCTACTGTCTTGCC -3′ |
| 6 | CDH11 | Forward 5′-GATCGTCACACTGACCTCGACA -3′  Forward 5′-CTTTGGCTTCCTGATGCCGATTG -3′ |
| 7 | RPL15 | Forward 5′-TACGGCAAGCCTGTCCATCATG -3′  Forward 5′-GTATGTGGAATCTTCACCAACCC-3′ |
| 8 | RPS6KA2 | Forward 5′- CGGAAGGAGACCATGACACTGA-3′  Forward 5′- GTTGGCAGGATTCCGCTTGAAC-3′ |
