# Supplementary material for: Estrogen Receptor Alpha Dynamics and Plasticity During Endocrine Resistance
Source: Research Square preprint supplement (doi:10.21203/rs.3.rs-6295413/v1), 2025-04-30
Supplement: Supplementary file 3 [file ff217f618f5e6c29941cb358.xlsx]

## Sheet: DESEQ2-ESR1
ENSEMBL	SYMBOL	Base mean	log2(FC)	StdErr	Wald-Stats	P-value	P-adj	GENENAME
ENSG00000099399	MAGEB2	1055.71	13.1713	1.46904	8.96594	3.08e-19	2.94e-16	MAGE family member B2
ENSG00000214107	MAGEB1	333.281	11.5078	1.484	7.75461	8.86e-15	4.09e-12	MAGE family member B1
ENSG00000091831	ESR1	732.459	10.2971	1.06886	9.63371	5.76e-22	1.03e-18	estrogen receptor 1
ENSG00000260896	ARLNC1	109.101	9.89684	1.52123	6.50583	7.73e-11	1.91e-08	androgen receptor regulated long noncoding RNA 1
ENSG00000077274	CAPN6	74.5459	9.3476	1.563	5.98056	2.22e-09	4.14e-07	calpain 6
ENSG00000082175	PGR	24.5522	7.7453	1.7228	4.49575	6.93e-06	0.000518091	progesterone receptor
ENSG00000154928	EPHB1	22.2812	7.60502	1.73982	4.37117	1.24e-05	0.000823645	EPH receptor B1
ENSG00000213030	CGB8	21.7624	7.57084	1.75576	4.312	1.62e-05	0.00103455	chorionic gonadotropin subunit beta 8
ENSG00000169550	MUC15	16.6133	7.18122	1.85062	3.88044	0.000104267	0.00485478	mucin 15	cell surface associated
ENSG00000176049	JAKMIP2	14.0857	6.94358	1.88679	3.6801	0.000233139	0.00938054	janus kinase and microtubule interacting protein 2
ENSG00000165092	ALDH1A1	13.9109	6.92486	2.01908	3.42971	0.000604236	0.0194934	aldehyde dehydrogenase 1 family member A1
ENSG00000136960	ENPP2	61.5359	6.75226	1.22299	5.52111	3.37e-08	5.01e-06	ectonucleotide pyrophosphatase/phosphodiesterase 2
NA	LOC105373989	10.8911	6.5726	2.00057	3.28536	0.00101853	0.0289308	putative cuticle collagen 91
ENSG00000226317	LINC00351	10.8101	6.56218	2.06475	3.17819	0.00148198	0.0389501	long intergenic non-protein coding RNA 351
ENSG00000227234	SPANXB1	3328.67	6.55201	0.324925	20.1647	2e-90	2.87e-86	SPANX family member B1
ENSG00000189052	CGB5	10.5543	6.52696	2.01067	3.24616	0.00116975	0.032409	chorionic gonadotropin subunit beta 5
ENSG00000116132	PRRX1	10.4462	6.51267	2.04796	3.18008	0.00147235	0.0387682	paired related homeobox 1
ENSG00000147027	TMEM47	51.9918	6.51106	1.23817	5.25861	1.45e-07	1.82e-05	transmembrane protein 47
ENSG00000155093	PTPRN2	895.047	6.36182	0.372698	17.0696	2.5e-65	1.79e-61	protein tyrosine phosphatase receptor type N2
ENSG00000077942	FBLN1	120.354	5.77861	0.720812	8.0168	1.09e-15	6.76e-13	fibulin 1
ENSG00000164627	KIF6	34.0637	5.65943	1.27569	4.43638	9.15e-06	0.000642358	kinesin family member 6
ENSG00000163485	ADORA1	95.2682	5.43563	0.773324	7.02892	2.08e-12	7.27e-10	adenosine A1 receptor
ENSG00000100344	PNPLA3	21.4616	5.26279	1.44894	3.63216	0.000281054	0.0108221	patatin like phospholipase domain containing 3
ENSG00000163083	INHBB	77.9752	5.2259	0.79484	6.57478	4.87e-11	1.29e-08	inhibin subunit beta B
ENSG00000185862	EVI2B	384.675	4.66338	0.388419	12.0061	3.3e-33	1.18e-29	ecotropic viral integration site 2B
ENSG00000158445	KCNB1	18.2524	4.63165	1.48305	3.12305	0.00178985	0.044203	potassium voltage-gated channel subfamily B member 1
ENSG00000189186	DCAF8L2	73.0016	4.62121	0.787466	5.86845	4.4e-09	7.78e-07	DDB1 and CUL4 associated factor 8 like 2
ENSG00000171714	ANO5	32.3602	4.5665	1.09943	4.15351	3.27e-05	0.00190644	anoctamin 5
ENSG00000110811	P3H3	31.8351	4.54168	1.09982	4.12946	3.64e-05	0.00208333	prolyl 3-hydroxylase 3
ENSG00000148942	SLC5A12	18.1371	4.45778	1.38801	3.21165	0.00131977	0.035736	solute carrier family 5 member 12
ENSG00000074211	PPP2R2C	191.445	4.42646	0.476308	9.29328	1.5e-20	1.95e-17	protein phosphatase 2 regulatory subunit Bgamma
ENSG00000162591	MEGF6	345.993	4.34728	0.470895	9.23195	2.66e-20	3.17e-17	multiple EGF like domains 6
ENSG00000148483	TMEM236	17.749	4.26043	1.33671	3.18724	0.00143636	0.0381007	transmembrane protein 236
ENSG00000108018	SORCS1	19.1866	4.13316	1.30678	3.16285	0.00156231	0.0406144	sortilin related VPS10 domain containing receptor 1
ENSG00000147100	SLC16A2	61.3491	4.08514	0.734339	5.56301	2.65e-08	4.04e-06	solute carrier family 16 member 2
ENSG00000066056	TIE1	311.189	4.07012	0.473184	8.60155	7.86e-18	6.63e-15	tyrosine kinase with immunoglobulin like and EGF like domains 1
ENSG00000161681	SHANK1	58.3577	3.96588	0.827225	4.79419	1.63e-06	0.000148074	SH3 and multiple ankyrin repeat domains 1
ENSG00000278311	GGNBP2	112.702	3.9622	0.691536	5.72956	1.01e-08	1.72e-06	gametogenetin binding protein 2
ENSG00000177628	GBA1	50.4673	3.92151	0.802905	4.88416	1.04e-06	0.000102612	glucosylceramidase beta 1
ENSG00000162804	SNED1	38.7862	3.87645	1.06124	3.65276	0.000259432	0.0102372	sushi	nidogen and EGF like domains 1
ENSG00000104267	CA2	56.5353	3.70695	0.760873	4.87197	1.1e-06	0.000107664	carbonic anhydrase 2
ENSG00000189001	SBSN	30.3044	3.66242	1.13857	3.21668	0.00129682	0.0353149	suprabasin
ENSG00000244588	RAD21L1	33.9353	3.64069	0.926159	3.93096	8.46e-05	0.004066	RAD21 cohesin complex component like 1
ENSG00000012124	CD22	524.161	3.62802	0.43126	8.4126	4.01e-17	3.02e-14	CD22 molecule
ENSG00000157303	SUSD3	33.1323	3.62209	1.01265	3.57684	0.00034777	0.0128388	sushi domain containing 3
ENSG00000079308	TNS1	280.872	3.52721	0.388336	9.0829	1.06e-19	1.08e-16	tensin 1
ENSG00000214049	UCA1	383.133	3.52686	0.44672	7.89501	2.9e-15	1.66e-12	urothelial cancer associated 1
ENSG00000172794	RAB37	58.5094	3.43301	0.898995	3.81872	0.000134145	0.00596735	RAB37	member RAS oncogene family
ENSG00000124429	POF1B	98.1838	3.39408	0.704691	4.81641	1.46e-06	0.000134207	POF1B actin binding protein
ENSG00000148671	ADIRF	56.8303	3.38508	0.753381	4.49318	7.02e-06	0.000518091	adipogenesis regulatory factor
ENSG00000069424	KCNAB2	890.113	3.34094	0.277655	12.0327	2.39e-33	1.14e-29	potassium voltage-gated channel subfamily A regulatory beta subunit 2
NA	LINC02315	35.2416	3.33587	1.0789	3.09193	0.0019886	0.048035	long intergenic non-protein coding RNA 2315
ENSG00000126016	AMOT	270.193	3.27156	0.447163	7.31625	2.55e-13	9.87e-11	angiomotin
NA	PSG10P	256.042	3.24708	0.486097	6.6799	2.39e-11	6.85e-09	pregnancy specific beta-1-glycoprotein 10	pseudogene
NA	LOC100996664	35.5375	3.23849	0.982729	3.2954	0.000982817	0.0283828	uncharacterized LOC100996664
ENSG00000162458	FBLIM1	217.785	3.19299	0.470255	6.78991	1.12e-11	3.42e-09	filamin binding LIM protein 1
ENSG00000126860	EVI2A	354.346	3.19247	0.396347	8.05473	7.97e-16	5.19e-13	ecotropic viral integration site 2A
ENSG00000237172	B3GNT9	44.6306	3.14238	0.783532	4.01053	6.06e-05	0.00320211	UDP-GlcNAc:betaGal beta-1	3-N-acetylglucosaminyltransferase 9
ENSG00000198768	APCDD1L	231.75	3.13259	0.422485	7.41467	1.22e-13	5.14e-11	APC down-regulated 1 like
ENSG00000063438	AHRR	61.5296	3.11779	0.742239	4.20052	2.66e-05	0.00160277	aryl hydrocarbon receptor repressor
ENSG00000229563	LINC01204	36.786	3.0876	0.911268	3.38824	0.000703415	0.0218727	long intergenic non-protein coding RNA 1204
ENSG00000243137	PSG4	332.578	3.08095	0.374816	8.2199	2.04e-16	1.39e-13	pregnancy specific beta-1-glycoprotein 4
ENSG00000129682	FGF13	766.958	3.02816	0.292727	10.3447	4.42e-25	9.05e-22	fibroblast growth factor 13
ENSG00000235180	LINC00601	107.879	3.00539	0.537568	5.59072	2.26e-08	3.56e-06	long intergenic non-protein coding RNA 601
ENSG00000127399	LRRC61	36.7735	2.93385	0.830424	3.53295	0.000410953	0.0146067	leucine rich repeat containing 61
ENSG00000066032	CTNNA2	52.237	2.91035	0.739504	3.93554	8.3e-05	0.00401708	catenin alpha 2
ENSG00000087510	TFAP2C	481.03	2.83316	0.311919	9.083	1.06e-19	1.08e-16	transcription factor AP-2 gamma
ENSG00000157502	PWWP3B	45.1295	2.82496	0.757928	3.72722	0.000193604	0.00796894	PWWP domain containing 3B
ENSG00000113389	NPR3	113.603	2.82421	0.539225	5.23753	1.63e-07	2.01e-05	natriuretic peptide receptor 3
ENSG00000183668	PSG9	78.7959	2.82008	0.609033	4.63042	3.65e-06	0.000293656	pregnancy specific beta-1-glycoprotein 9
ENSG00000115602	IL1RL1	81.1661	2.80656	0.68043	4.12468	3.71e-05	0.00211024	interleukin 1 receptor like 1
ENSG00000198542	ITGBL1	90.0185	2.80323	0.574335	4.88083	1.06e-06	0.000103644	integrin subunit beta like 1
ENSG00000041515	MYO16	58.0284	2.7837	0.721743	3.85692	0.000114825	0.00528862	myosin XVI
ENSG00000166250	CLMP	195.934	2.77033	0.43182	6.41546	1.4e-10	3.3e-08	CXADR like membrane protein
ENSG00000169583	CLIC3	72.5868	2.75423	0.608435	4.52674	5.99e-06	0.000461301	chloride intracellular channel 3
ENSG00000151062	CACNA2D4	238.172	2.75357	0.415804	6.62228	3.54e-11	9.56e-09	calcium voltage-gated channel auxiliary subunit alpha2delta 4
ENSG00000082126	MPP4	447.426	2.70447	0.339573	7.96431	1.66e-15	9.92e-13	MAGUK p55 scaffold protein 4
ENSG00000237013	LINC01812	55.0146	2.70234	0.774225	3.49038	0.000482339	0.016411	long intergenic non-protein coding RNA 1812
ENSG00000148848	ADAM12	59.1361	2.6601	0.662846	4.01315	5.99e-05	0.00317848	ADAM metallopeptidase domain 12
ENSG00000002746	HECW1	79.7329	2.60004	0.600393	4.33056	1.49e-05	0.000963992	HECT	C2 and WW domain containing E3 ubiquitin protein ligase 1
ENSG00000167895	TMC8	76.1918	2.5994	0.707645	3.6733	0.000239434	0.00958002	transmembrane channel like 8
ENSG00000187134	AKR1C1	52.4302	2.59209	0.839445	3.08786	0.00201603	0.0482903	aldo-keto reductase family 1 member C1
ENSG00000143195	ILDR2	429.266	2.54825	0.323462	7.87802	3.33e-15	1.7e-12	immunoglobulin like domain containing receptor 2
ENSG00000184916	JAG2	45.8003	2.51989	0.728968	3.45679	0.000546643	0.0180834	jagged canonical Notch ligand 2
ENSG00000124772	CPNE5	56.8421	2.51069	0.740314	3.39138	0.000695408	0.021749	copine 5
ENSG00000142552	RCN3	292.868	2.43934	0.400466	6.09126	1.12e-09	2.29e-07	reticulocalbin 3
ENSG00000095752	IL11	446.063	2.43565	0.478873	5.0862	3.65e-07	4.06e-05	interleukin 11
NA	LINC01358	55.8333	2.43522	0.671813	3.62485	0.000289128	0.0111031	long intergenic non-protein coding RNA 1358
ENSG00000173705	SUSD5	377.24	2.42402	0.332163	7.29766	2.93e-13	1.1e-10	sushi domain containing 5
ENSG00000130529	TRPM4	66.8704	2.40838	0.640072	3.76267	0.000168108	0.00712421	transient receptor potential cation channel subfamily M member 4
ENSG00000103512	NOMO1	75.6066	2.33959	0.701111	3.33697	0.00084697	0.025226	NODAL modulator 1
ENSG00000155962	CLIC2	185.218	2.3351	0.435399	5.36312	8.18e-08	1.08e-05	chloride intracellular channel 2
ENSG00000169169	CPT1C	270.571	2.28934	0.440356	5.19884	2.01e-07	2.35e-05	carnitine palmitoyltransferase 1C
ENSG00000259207	ITGB3	104.28	2.28484	0.574862	3.9746	7.05e-05	0.00358095	integrin subunit beta 3
ENSG00000196406	SPANXD	332.336	2.26765	0.362558	6.25459	3.99e-10	9.06e-08	SPANX family member D
ENSG00000175711	B3GNTL1	124.212	2.26322	0.484571	4.67056	3e-06	0.000248708	UDP-GlcNAc:betaGal beta-1	3-N-acetylglucosaminyltransferase like 1
ENSG00000149260	CAPN5	191.282	2.2551	0.445909	5.05732	4.25e-07	4.55e-05	calpain 5
ENSG00000140022	STON2	98.026	2.25318	0.568418	3.96394	7.37e-05	0.00370531	stonin 2
ENSG00000123689	G0S2	6712.27	2.24314	0.23603	9.50362	2.03e-21	2.9e-18	G0/G1 switch 2
ENSG00000177432	NAP1L5	82.326	2.23912	0.581584	3.85004	0.000118098	0.0054059	nucleosome assembly protein 1 like 5
ENSG00000144230	GPR17	74.3679	2.21805	0.598069	3.70868	0.000208339	0.00852642	G protein-coupled receptor 17
ENSG00000196335	STK31	127.397	2.20802	0.493296	4.47605	7.6e-06	0.000547308	serine/threonine kinase 31
ENSG00000150471	ADGRL3	94.0371	2.19769	0.566241	3.8812	0.000103942	0.00485478	adhesion G protein-coupled receptor L3
ENSG00000138449	SLC40A1	87.9077	2.18735	0.553147	3.95438	7.67e-05	0.00384312	solute carrier family 40 member 1
ENSG00000085117	CD82	410.631	2.13489	0.460969	4.6313	3.63e-06	0.000293656	CD82 molecule
ENSG00000136235	GPNMB	167.33	2.1318	0.63625	3.35056	0.000806472	0.0244226	glycoprotein nmb
ENSG00000100979	PLTP	72.4496	2.11081	0.594928	3.54801	0.000388156	0.0139697	phospholipid transfer protein
ENSG00000176046	NUPR1	82.1487	2.109	0.674885	3.12497	0.00177821	0.0441439	nuclear protein 1	transcriptional regulator
ENSG00000151150	ANK3	119.019	2.10687	0.522783	4.03011	5.58e-05	0.00301354	ankyrin 3
ENSG00000242193	CRYZL2P	109.897	2.10654	0.491345	4.2873	1.81e-05	0.00114122	crystallin zeta like 2	pseudogene
ENSG00000188064	WNT7B	345.686	2.09538	0.402308	5.20839	1.9e-07	2.27e-05	Wnt family member 7B
ENSG00000120708	TGFBI	1521.74	2.08915	0.265001	7.88353	3.18e-15	1.7e-12	transforming growth factor beta induced
ENSG00000145526	CDH18	130.696	2.08029	0.460129	4.5211	6.15e-06	0.000471237	cadherin 18
ENSG00000154553	PDLIM3	86.19	2.07415	0.550271	3.76932	0.000163691	0.00695758	PDZ and LIM domain 3
ENSG00000171680	PLEKHG5	88.2055	2.04374	0.628352	3.25255	0.00114376	0.031812	pleckstrin homology and RhoGEF domain containing G5
ENSG00000101665	SMAD7	113.266	1.99623	0.509771	3.91594	9.01e-05	0.00429973	SMAD family member 7
ENSG00000144821	MYH15	86.2408	1.94155	0.555428	3.4956	0.000472998	0.0162087	myosin heavy chain 15
ENSG00000148677	ANKRD1	9972.38	1.94072	0.311979	6.22069	4.95e-10	1.07e-07	ankyrin repeat domain 1
ENSG00000254300	LINC01111	81.5427	1.91204	0.55872	3.42219	0.000621196	0.0198616	long intergenic non-protein coding RNA 1111
ENSG00000183336	BOLA2	218.816	1.8913	0.602456	3.13932	0.00169338	0.0427042	bolA family member 2
ENSG00000196139	AKR1C3	354.933	1.88217	0.439484	4.28268	1.85e-05	0.00114619	aldo-keto reductase family 1 member C3
ENSG00000162645	GBP2	370.15	1.86888	0.411618	4.54032	5.62e-06	0.000434898	guanylate binding protein 2
ENSG00000225383	SFTA1P	1411.35	1.85837	0.350558	5.3012	1.15e-07	1.5e-05	surfactant associated 1	lncRNA
ENSG00000197415	VEPH1	332.945	1.85647	0.339059	5.47536	4.37e-08	6.25e-06	ventricular zone expressed PH domain containing 1
ENSG00000204792	LINC01291	148.236	1.85616	0.486588	3.81465	0.000136377	0.0060479	long intergenic non-protein coding RNA 1291
ENSG00000153993	SEMA3D	87.4364	1.85456	0.58539	3.16808	0.00153452	0.0401103	semaphorin 3D
ENSG00000160255	ITGB2	428.641	1.8375	0.377829	4.8633	1.15e-06	0.00011173	integrin subunit beta 2
ENSG00000107738	VSIR	142.796	1.81085	0.517079	3.50209	0.00046163	0.0159039	V-set immunoregulatory receptor
ENSG00000123977	DAW1	115.498	1.80996	0.515767	3.50925	0.000449373	0.0156614	dynein assembly factor with WD repeats 1
ENSG00000109610	SOD3	370.582	1.80977	0.332214	5.4476	5.11e-08	7.17e-06	superoxide dismutase 3
ENSG00000147231	RADX	103.807	1.78172	0.524841	3.39479	0.000686823	0.0215275	RPA1 related single stranded DNA binding protein	X-linked
ENSG00000018236	CNTN1	144.063	1.76855	0.470219	3.76112	0.000169154	0.00714737	contactin 1
ENSG00000106484	MEST	145.504	1.76203	0.459883	3.83148	0.000127376	0.00572298	mesoderm specific transcript
ENSG00000181019	NQO1	2786.52	1.75871	0.282163	6.23295	4.58e-10	1.02e-07	NAD(P)H quinone dehydrogenase 1
ENSG00000137575	SDCBP	2855.54	1.75798	0.271196	6.48232	9.03e-11	2.16e-08	syndecan binding protein
ENSG00000170745	KCNS3	125.755	1.75242	0.49961	3.50757	0.000452222	0.0157224	potassium voltage-gated channel modifier subfamily S member 3
ENSG00000154646	TMPRSS15	1752.64	1.7222	0.249065	6.91466	4.69e-12	1.46e-09	transmembrane serine protease 15
NA	LOC100507002	101.307	1.70633	0.511029	3.339	0.00084081	0.0251436	uncharacterized LOC100507002
ENSG00000116661	FBXO2	113.494	1.70119	0.54723	3.10873	0.00187895	0.0456945	F-box protein 2
ENSG00000176170	SPHK1	191.172	1.69951	0.475645	3.57307	0.000352827	0.0129587	sphingosine kinase 1
ENSG00000151240	DIP2C	250.609	1.68195	0.417156	4.03194	5.53e-05	0.00300143	disco interacting protein 2 homolog C
ENSG00000105767	CADM4	109.646	1.67893	0.510669	3.2877	0.00101009	0.0287981	cell adhesion molecule 4
ENSG00000157510	AFAP1L1	508.327	1.67806	0.327493	5.12396	2.99e-07	3.4e-05	actin filament associated protein 1 like 1
ENSG00000151892	GFRA1	251.956	1.67066	0.390119	4.28245	1.85e-05	0.00114619	GDNF family receptor alpha 1
ENSG00000121236	TRIM6	104.968	1.6678	0.517956	3.21997	0.00128204	0.034979	tripartite motif containing 6
ENSG00000154153	RETREG1	105.752	1.63946	0.528839	3.10011	0.00193447	0.0469649	reticulophagy regulator 1
ENSG00000153029	MR1	163.898	1.6232	0.47245	3.4357	0.000591019	0.0192404	major histocompatibility complex	class I-related
ENSG00000185532	PRKG1	106.553	1.60606	0.495392	3.24201	0.00118691	0.0327144	protein kinase cGMP-dependent 1
ENSG00000186310	NAP1L3	291.875	1.60254	0.367984	4.35492	1.33e-05	0.000870642	nucleosome assembly protein 1 like 3
ENSG00000184497	TMEM255B	222.468	1.59639	0.401501	3.97606	7.01e-05	0.00358095	transmembrane protein 255B
ENSG00000117152	RGS4	644.888	1.59295	0.328441	4.85003	1.23e-06	0.000117097	regulator of G protein signaling 4
ENSG00000226742	HSBP1L1	126.52	1.59092	0.461607	3.44647	0.000567952	0.0186591	heat shock factor binding protein 1 like 1
ENSG00000121316	PLBD1	109.227	1.58809	0.495578	3.20452	0.00135287	0.0364258	phospholipase B domain containing 1
ENSG00000108798	ABI3	210.514	1.58717	0.381417	4.16124	3.17e-05	0.00185814	ABI family member 3
ENSG00000079459	FDFT1	2513.13	1.57823	0.253644	6.22223	4.9e-10	1.07e-07	farnesyl-diphosphate farnesyltransferase 1
ENSG00000177409	SAMD9L	215.295	1.57291	0.472028	3.33224	0.00086151	0.0254964	sterile alpha motif domain containing 9 like
ENSG00000196172	ZNF681	147.028	1.57221	0.435226	3.61241	0.000303369	0.0114959	zinc finger protein 681
ENSG00000137486	ARRB1	731.25	1.57101	0.437437	3.59139	0.000328919	0.0122693	arrestin beta 1
ENSG00000170954	ZNF415	217.895	1.55226	0.399312	3.88735	0.000101344	0.00475952	zinc finger protein 415
ENSG00000082397	EPB41L3	5420.38	1.54538	0.232466	6.64777	2.98e-11	8.2e-09	erythrocyte membrane protein band 4.1 like 3
ENSG00000183621	ZNF438	524.323	1.54437	0.301044	5.13003	2.9e-07	3.32e-05	zinc finger protein 438
ENSG00000111863	ADTRP	247.035	1.54317	0.472611	3.2652	0.00109387	0.0307227	androgen dependent TFPI regulating protein
ENSG00000086730	LAT2	203.235	1.53908	0.385813	3.98917	6.63e-05	0.00344115	linker for activation of T cells family member 2
ENSG00000172296	SPTLC3	825.278	1.5369	0.319355	4.8125	1.49e-06	0.000135989	serine palmitoyltransferase long chain base subunit 3
ENSG00000164674	SYTL3	148.624	1.53192	0.457994	3.34485	0.000823278	0.0247688	synaptotagmin like 3
ENSG00000099256	PRTFDC1	425.902	1.52963	0.316038	4.84001	1.3e-06	0.00011998	phosphoribosyl transferase domain containing 1
ENSG00000140961	OSGIN1	132.039	1.52544	0.464027	3.2874	0.00101116	0.0287981	oxidative stress induced growth inhibitor 1
ENSG00000175197	DDIT3	153.044	1.50904	0.442388	3.41113	0.000646934	0.0205015	DNA damage inducible transcript 3
ENSG00000153823	PID1	160.374	1.49481	0.434976	3.43655	0.000589184	0.0192243	phosphotyrosine interaction domain containing 1
ENSG00000178150	ZNF114	340.469	1.49368	0.399411	3.7397	0.00018424	0.00764944	zinc finger protein 114
ENSG00000115648	MLPH	1133.58	1.49047	0.334686	4.45335	8.45e-06	0.000599492	melanophilin
NA	RNR2	156433	1.4903	0.298031	5.00049	5.72e-07	5.89e-05	l-rRNA
ENSG00000130066	SAT1	1289.24	1.48844	0.330128	4.50867	6.52e-06	0.000497038	spermidine/spermine N1-acetyltransferase 1
ENSG00000180190	TDRP	143.248	1.48491	0.475403	3.12348	0.00178728	0.044203	testis development related protein
ENSG00000027075	PRKCH	237.837	1.48466	0.400877	3.70354	0.000212613	0.00867656	protein kinase C eta
ENSG00000144369	FAM171B	247.846	1.47634	0.405743	3.63861	0.000274117	0.0105834	family with sequence similarity 171 member B
ENSG00000135905	DOCK10	447.446	1.47096	0.358443	4.10376	4.06e-05	0.00230142	dedicator of cytokinesis 10
ENSG00000179222	MAGED1	691.914	1.46335	0.2883	5.0758	3.86e-07	4.21e-05	MAGE family member D1
ENSG00000142910	TINAGL1	907.973	1.45521	0.335097	4.34264	1.41e-05	0.0009166	tubulointerstitial nephritis antigen like 1
ENSG00000234498	RPL13AP20	176.476	1.45021	0.425422	3.40887	0.000652333	0.0205363	ribosomal protein L13a pseudogene 20
ENSG00000260279	LOC105371414	272.336	1.43922	0.43024	3.34516	0.000822361	0.0247688	uncharacterized LOC105371414
ENSG00000106211	HSPB1	2945	1.42335	0.236187	6.02638	1.68e-09	3.25e-07	heat shock protein family B (small) member 1
ENSG00000065833	ME1	291.458	1.40728	0.347592	4.04865	5.15e-05	0.00283326	malic enzyme 1
NA	NA	167.633	1.40375	0.442224	3.1743	0.00150196	0.039331	NA
ENSG00000185215	TNFAIP2	677.405	1.40185	0.398066	3.52166	0.000428861	0.0150227	TNF alpha induced protein 2
ENSG00000169994	MYO7B	191.596	1.4009	0.408113	3.43264	0.000597743	0.0193712	myosin VIIB
ENSG00000171992	SYNPO	288.824	1.40022	0.343512	4.07619	4.58e-05	0.00255157	synaptopodin
ENSG00000136160	EDNRB	368.835	1.39023	0.332625	4.17958	2.92e-05	0.00172867	endothelin receptor type B
ENSG00000291090	CCDC144BP	246.159	1.388	0.405831	3.42014	0.000625892	0.0199228	coiled-coil domain containing 144B	pseudogene
ENSG00000105379	ETFB	801.544	1.38487	0.290413	4.76861	1.86e-06	0.000165042	electron transfer flavoprotein subunit beta
ENSG00000043355	ZIC2	409.894	1.33885	0.323676	4.1364	3.53e-05	0.00203771	Zic family member 2
ENSG00000132688	NES	253.954	1.33872	0.418977	3.1952	0.00139735	0.037273	nestin
ENSG00000103647	CORO2B	298.417	1.33666	0.33915	3.94122	8.11e-05	0.00396329	coronin 2B
ENSG00000138413	IDH1	1158.22	1.33355	0.260409	5.12096	3.04e-07	3.43e-05	isocitrate dehydrogenase (NADP(+)) 1
ENSG00000126226	PCID2	1024.28	1.32819	0.261727	5.07473	3.88e-07	4.21e-05	PCI domain containing 2
NA	FRG1BP	436.053	1.31892	0.31034	4.24994	2.14e-05	0.00130334	FSHD region gene 1 family member B	pseudogene
ENSG00000165300	SLITRK5	160.552	1.31159	0.417943	3.1382	0.00169989	0.042718	SLIT and NTRK like family member 5
ENSG00000179950	PUF60	300.598	1.30938	0.354317	3.6955	0.000219456	0.00890505	poly(U) binding splicing factor 60
ENSG00000269190	FBXO17	299.911	1.30885	0.364409	3.5917	0.000328523	0.0122693	F-box protein 17
ENSG00000049246	PER3	260.847	1.3041	0.35269	3.69758	0.000217662	0.00885735	period circadian regulator 3
ENSG00000088367	EPB41L1	412.125	1.29982	0.337617	3.84998	0.000118127	0.0054059	erythrocyte membrane protein band 4.1 like 1
ENSG00000110492	MDK	364.832	1.29824	0.341358	3.80316	0.000142861	0.00623883	midkine
ENSG00000055163	CYFIP2	453.113	1.29488	0.32423	3.99372	6.5e-05	0.00338807	cytoplasmic FMR1 interacting protein 2
ENSG00000079931	MOXD1	192.974	1.29364	0.410265	3.15319	0.00161496	0.0414517	monooxygenase DBH like 1
ENSG00000153531	ADPRHL1	301.708	1.29035	0.358499	3.59932	0.000319055	0.0119951	ADP-ribosylhydrolase like 1
ENSG00000204219	TCEA3	645.513	1.28328	0.292454	4.38798	1.14e-05	0.000776672	transcription elongation factor A3
ENSG00000168386	FILIP1L	297.355	1.27706	0.340687	3.7485	0.000177898	0.00747276	filamin A interacting protein 1 like
ENSG00000111252	SH2B3	2674.96	1.27114	0.234682	5.41641	6.08e-08	8.2e-06	SH2B adaptor protein 3
ENSG00000087266	SH3BP2	578.079	1.26269	0.365664	3.45313	0.000554114	0.0182883	SH3 domain binding protein 2
ENSG00000102580	DNAJC3	1060.07	1.26013	0.260175	4.84338	1.28e-06	0.000118729	DnaJ heat shock protein family (Hsp40) member C3
ENSG00000152193	OBI1	470.021	1.25544	0.352047	3.5661	0.000362327	0.0131725	ORC ubiquitin ligase 1
ENSG00000225830	ERCC6	380.163	1.24603	0.340059	3.66416	0.000248148	0.00987353	ERCC excision repair 6	chromatin remodeling factor
ENSG00000182809	CRIP2	385.572	1.24295	0.375637	3.30891	0.000936598	0.0273102	cysteine rich protein 2
ENSG00000167083	GNGT2	737.825	1.24081	0.283867	4.37109	1.24e-05	0.000823645	G protein subunit gamma transducin 2
ENSG00000269416	LINC01224	268.003	1.23835	0.386094	3.20738	0.00133951	0.0362021	long intergenic non-protein coding RNA 1224
ENSG00000172159	FRMD3	541.611	1.23293	0.355657	3.46664	0.000527008	0.0175148	FERM domain containing 3
ENSG00000206538	VGLL3	274.525	1.232	0.34751	3.54521	0.000392304	0.0140379	vestigial like family member 3
ENSG00000144591	GMPPA	484.265	1.21591	0.316361	3.84343	0.000121328	0.0055347	GDP-mannose pyrophosphorylase A
ENSG00000070087	PFN2	2287.46	1.21479	0.238924	5.08445	3.69e-07	4.06e-05	profilin 2
ENSG00000132879	FBXO44	207.512	1.20376	0.388513	3.09837	0.00194591	0.0471627	F-box protein 44
ENSG00000022267	FHL1	697.745	1.20313	0.290734	4.13824	3.5e-05	0.00202963	four and a half LIM domains 1
ENSG00000130475	FCHO1	351.298	1.18898	0.356862	3.33175	0.000863021	0.0254964	FCH and mu domain containing endocytic adaptor 1
ENSG00000132470	ITGB4	3108.01	1.18276	0.373611	3.16576	0.00154677	0.0402835	integrin subunit beta 4
ENSG00000164509	IL31RA	324.962	1.17676	0.354326	3.32112	0.000896561	0.0264246	interleukin 31 receptor A
ENSG00000122678	POLM	426.984	1.1728	0.313183	3.74477	0.000180561	0.00754039	DNA polymerase mu
ENSG00000181192	DHTKD1	436.036	1.15927	0.317712	3.64881	0.000263459	0.0102407	dehydrogenase E1 and transketolase domain containing 1
ENSG00000090530	P3H2	1168.93	1.15123	0.256175	4.49392	6.99e-06	0.000518091	prolyl 3-hydroxylase 2
ENSG00000109501	WFS1	752.18	1.14248	0.272769	4.18844	2.81e-05	0.00167634	wolframin ER transmembrane glycoprotein
ENSG00000116678	LEPR	488.372	1.13696	0.350331	3.2454	0.00117286	0.0324324	leptin receptor
ENSG00000168952	STXBP6	511.9	1.13624	0.307835	3.69106	0.00022332	0.00903624	syntaxin binding protein 6
ENSG00000254685	FPGT	313.76	1.13448	0.359149	3.1588	0.00158421	0.0410216	fucose-1-phosphate guanylyltransferase
ENSG00000116106	EPHA4	346.802	1.13322	0.341954	3.31396	0.000919854	0.0270554	EPH receptor A4
ENSG00000011028	MRC2	776.425	1.12805	0.31599	3.56988	0.000357139	0.0130169	mannose receptor C type 2
ENSG00000051108	HERPUD1	574.47	1.12317	0.31012	3.62171	0.00029266	0.0112087	homocysteine inducible ER protein with ubiquitin like domain 1
ENSG00000143797	MBOAT2	1942.97	1.10838	0.253924	4.36501	1.27e-05	0.000839102	membrane bound O-acyltransferase domain containing 2
ENSG00000101955	SRPX	321.253	1.10314	0.333466	3.3081	0.000939312	0.0273102	sushi repeat containing protein X-linked
ENSG00000132613	MTSS2	1361.26	1.08867	0.251682	4.3256	1.52e-05	0.000981483	MTSS I-BAR domain containing 2
ENSG00000213694	S1PR3	439.734	1.08651	0.344675	3.15228	0.00162001	0.0414517	sphingosine-1-phosphate receptor 3
ENSG00000102595	UGGT2	574.149	1.07711	0.290012	3.71403	0.000203985	0.00837215	UDP-glucose glycoprotein glucosyltransferase 2
ENSG00000127920	GNG11	280.49	1.0757	0.344868	3.11916	0.00181369	0.0444923	G protein subunit gamma 11
ENSG00000184156	KCNQ3	861.272	1.07279	0.283852	3.7794	0.000157208	0.00674206	potassium voltage-gated channel subfamily Q member 3
ENSG00000117984	CTSD	6626.95	1.06943	0.303404	3.52476	0.00042387	0.0149545	cathepsin D
ENSG00000112972	HMGCS1	820.422	1.05081	0.270816	3.88016	0.000104389	0.00485478	3-hydroxy-3-methylglutaryl-CoA synthase 1
ENSG00000184232	OAF	1139.93	1.04359	0.267744	3.8977	9.71e-05	0.00457566	out at first homolog
ENSG00000148180	GSN	1427.64	1.04295	0.299861	3.4781	0.000504973	0.0169814	gelsolin
ENSG00000050820	BCAR1	1556.15	1.03543	0.282647	3.66333	0.000248962	0.00987848	BCAR1 scaffold protein	Cas family member
ENSG00000138443	ABI2	1438.54	1.03224	0.260208	3.96698	7.28e-05	0.00368425	abl interactor 2
ENSG00000004399	PLXND1	762.288	1.02198	0.332503	3.0736	0.00211493	0.0504064	plexin D1
ENSG00000198168	SVIP	577.392	1.02009	0.28892	3.5307	0.000414461	0.0146586	small VCP interacting protein
ENSG00000133103	COG6	598.606	1.00627	0.291461	3.4525	0.000555413	0.0182891	component of oligomeric golgi complex 6
ENSG00000172216	CEBPB	491.261	0.982566	0.30856	3.18436	0.00145077	0.0383997	CCAAT enhancer binding protein beta
ENSG00000119718	EIF2B2	1138.89	0.981833	0.28283	3.47146	0.00051763	0.0172833	eukaryotic translation initiation factor 2B subunit beta
ENSG00000198157	HMGN5	769.865	0.974756	0.30953	3.14915	0.00163746	0.0417348	high mobility group nucleosome binding domain 5
ENSG00000069702	TGFBR3	463.341	0.970945	0.311244	3.11956	0.00181119	0.0444923	transforming growth factor beta receptor 3
ENSG00000163565	IFI16	3657.55	0.955921	0.255457	3.74201	0.000182556	0.00760156	interferon gamma inducible protein 16
ENSG00000162613	FUBP1	1849.24	0.950601	0.285323	3.33166	0.000863289	0.0254964	far upstream element binding protein 1
ENSG00000198919	DZIP3	731.598	0.949685	0.307655	3.08685	0.0020229	0.048374	DAZ interacting zinc finger protein 3
ENSG00000255248	MIR100HG	2013.71	0.948844	0.303735	3.12392	0.00178459	0.044203	mir-100-let-7a-2-mir-125b-1 cluster host gene
ENSG00000170035	UBE2E3	1920.38	0.94652	0.244222	3.87566	0.000106336	0.00492932	ubiquitin conjugating enzyme E2 E3
ENSG00000165416	SUGT1	1267.67	0.945616	0.261655	3.61399	0.000301524	0.0114563	SGT1 homolog	MIS12 kinetochore complex assembly cochaperone
ENSG00000173083	HPSE	462.745	0.941451	0.304541	3.09138	0.00199229	0.0480431	heparanase
ENSG00000134900	TPP2	1884.49	0.940953	0.260114	3.61746	0.000297507	0.0113338	tripeptidyl peptidase 2
ENSG00000005810	MYCBP2	1546.99	0.923553	0.270389	3.41565	0.000636297	0.0202091	MYC binding protein 2
ENSG00000198176	TFDP1	5407.36	0.913091	0.260413	3.50631	0.000454359	0.0157584	transcription factor Dp-1
ENSG00000115685	PPP1R7	983.713	0.907396	0.26089	3.47807	0.000505032	0.0169814	protein phosphatase 1 regulatory subunit 7
ENSG00000102910	LONP2	735.572	0.897905	0.278286	3.22656	0.00125288	0.0343798	lon peptidase 2	peroxisomal
ENSG00000102606	ARHGEF7	1062.23	0.896225	0.265684	3.37328	0.000742794	0.0228812	Rho guanine nucleotide exchange factor 7
ENSG00000102572	STK24	2435.37	0.882823	0.252152	3.50116	0.000463245	0.0159125	serine/threonine kinase 24
ENSG00000162512	SDC3	1712.71	0.878895	0.265546	3.30977	0.000933738	0.0272957	syndecan 3
ENSG00000166165	CKB	2836.48	0.872785	0.244349	3.57189	0.000354418	0.0129817	creatine kinase B
ENSG00000169062	UPF3A	1403.59	0.86838	0.247971	3.50194	0.000461885	0.0159039	UPF3A regulator of nonsense mediated mRNA decay
ENSG00000151929	BAG3	1704.29	0.865812	0.252539	3.42843	0.00060708	0.0195411	BAG cochaperone 3
ENSG00000125304	TM9SF2	3516.81	0.862989	0.231112	3.73407	0.000188412	0.00777756	transmembrane 9 superfamily member 2
ENSG00000134884	ARGLU1	1829.53	0.848598	0.242072	3.50556	0.000455654	0.0157652	arginine and glutamate rich 1
ENSG00000071794	HLTF	3245.68	0.845472	0.238182	3.54968	0.000385693	0.0139193	helicase like transcription factor
ENSG00000181789	COPG1	3163.63	0.841887	0.234196	3.59479	0.00032465	0.0121735	COPI coat complex subunit gamma 1
ENSG00000165487	MICU2	2050.8	0.830814	0.242583	3.42486	0.000615107	0.0197109	mitochondrial calcium uptake 2
ENSG00000198612	COPS8	1290.76	0.826461	0.256059	3.22762	0.00124825	0.0343185	COP9 signalosome subunit 8
ENSG00000100526	CDKN3	1692.78	0.820893	0.24422	3.36129	0.00077579	0.0237953	cyclin dependent kinase inhibitor 3
ENSG00000177200	CHD9	1089.56	0.813267	0.262771	3.09497	0.00196834	0.0476258	chromodomain helicase DNA binding protein 9
ENSG00000013441	CLK1	1691.28	0.796365	0.254586	3.12808	0.00175953	0.0437561	CDC like kinase 1
ENSG00000122068	FYTTD1	1916.27	0.796198	0.252203	3.15697	0.00159419	0.0411445	forty-two-three domain containing 1
ENSG00000196878	LAMB3	13173.3	0.789406	0.242209	3.25919	0.00111729	0.0312579	laminin subunit beta 3
ENSG00000197043	ANXA6	5812.49	0.784629	0.237498	3.30372	0.000954094	0.027609	annexin A6
ENSG00000129226	CD68	4231.24	0.773442	0.230899	3.34969	0.000809017	0.024448	CD68 molecule
ENSG00000169251	NMD3	1636.05	0.764541	0.245449	3.11486	0.00184029	0.0450604	NMD3 ribosome export adaptor
ENSG00000122952	ZWINT	2709.61	0.763658	0.24542	3.11164	0.00186053	0.0454782	ZW10 interacting kinetochore protein
ENSG00000161203	AP2M1	7260.53	0.710896	0.227741	3.12152	0.00179922	0.044358	adaptor related protein complex 2 subunit mu 1
ENSG00000162244	RPL29	9905.05	-0.746796	0.236664	-3.15551	0.0016022	0.0412028	ribosomal protein L29
ENSG00000163939	PBRM1	1837	-0.770027	0.249228	-3.08965	0.00200396	0.0480992	polybromo 1
ENSG00000050393	MCUR1	1747.41	-0.771796	0.250272	-3.08383	0.00204357	0.0487868	mitochondrial calcium uniporter regulator 1
ENSG00000173402	DAG1	2537.22	-0.785194	0.245663	-3.19623	0.00139236	0.0372094	dystroglycan 1
ENSG00000163814	CDCP1	3109.74	-0.786997	0.249668	-3.15218	0.00162056	0.0414517	CUB domain containing protein 1
ENSG00000153560	UBP1	1907.92	-0.794111	0.255396	-3.10933	0.00187511	0.0456787	upstream binding protein 1
ENSG00000125648	SLC25A23	1453.82	-0.802491	0.249674	-3.21415	0.00130832	0.0355605	solute carrier family 25 member 23
ENSG00000124535	WRNIP1	1726.18	-0.803662	0.244206	-3.29091	0.000998629	0.028666	WRN helicase interacting protein 1
ENSG00000153046	CDYL	1023.73	-0.82257	0.261699	-3.14319	0.00167117	0.0422185	chromodomain Y like
ENSG00000143418	CERS2	2850.8	-0.824603	0.250709	-3.28908	0.00100514	0.0287953	ceramide synthase 2
ENSG00000103653	CSK	1412.53	-0.824972	0.26237	-3.1443	0.00166483	0.0421324	C-terminal Src kinase
ENSG00000140416	TPM1	1197.17	-0.825626	0.262281	-3.14787	0.00164467	0.0418442	tropomyosin 1
ENSG00000180992	MRPL14	1536.11	-0.832859	0.260956	-3.19157	0.00141502	0.0376741	mitochondrial ribosomal protein L14
ENSG00000112531	QKI	2705.78	-0.834839	0.248698	-3.35684	0.000788397	0.0240789	QKI	KH domain containing RNA binding
ENSG00000224531	SMIM13	1188.61	-0.84001	0.267746	-3.13734	0.00170487	0.0427379	small integral membrane protein 13
ENSG00000183856	IQGAP3	2475.6	-0.841652	0.270562	-3.11075	0.00186614	0.0455377	IQ motif containing GTPase activating protein 3
ENSG00000154678	PDE1C	2091.95	-0.843497	0.239483	-3.52216	0.00042804	0.0150227	phosphodiesterase 1C
ENSG00000182606	TRAK1	805.074	-0.847681	0.275859	-3.07288	0.00212004	0.0504444	trafficking kinesin protein 1
ENSG00000004534	RBM6	1061.53	-0.854763	0.26909	-3.17649	0.00149067	0.0391068	RNA binding motif protein 6
ENSG00000170485	NPAS2	1828.54	-0.864159	0.25363	-3.40716	0.000656423	0.0206197	neuronal PAS domain protein 2
ENSG00000112033	PPARD	1501.6	-0.867558	0.259987	-3.33693	0.000847088	0.025226	peroxisome proliferator activated receptor delta
ENSG00000112640	PPP2R5D	2700.36	-0.876331	0.257015	-3.40965	0.000650456	0.0205363	protein phosphatase 2 regulatory subunit B'delta
ENSG00000150938	CRIM1	11364	-0.877937	0.26344	-3.33259	0.000860427	0.0254964	cysteine rich transmembrane BMP regulator 1
ENSG00000232112	TMA7	2065.26	-0.880593	0.253111	-3.47908	0.000503132	0.0169814	translation machinery associated 7 homolog
ENSG00000157593	SLC35B2	1327.99	-0.884132	0.249998	-3.53656	0.000405372	0.0144441	solute carrier family 35 member B2
ENSG00000069122	ADGRF5	5977.03	-0.885822	0.255653	-3.46494	0.000530351	0.0175851	adhesion G protein-coupled receptor F5
ENSG00000124702	KLHDC3	2395.18	-0.885844	0.242799	-3.64847	0.000263809	0.0102407	kelch domain containing 3
ENSG00000144635	DYNC1LI1	1261.53	-0.890228	0.285411	-3.11911	0.00181399	0.0444923	dynein cytoplasmic 1 light intermediate chain 1
ENSG00000172927	MYEOV	1442.15	-0.890671	0.265706	-3.35209	0.000802043	0.0243608	myeloma overexpressed
ENSG00000140598	EFL1	809.299	-0.895691	0.285521	-3.13704	0.00170665	0.0427379	elongation factor like GTPase 1
ENSG00000103657	HERC1	612.826	-0.898789	0.285277	-3.15059	0.00162941	0.0416038	HECT and RLD domain containing E3 ubiquitin protein ligase family member 1
ENSG00000124659	TBCC	776.21	-0.905905	0.276545	-3.2758	0.00105364	0.0298268	tubulin folding cofactor C
ENSG00000197555	SIPA1L1	731.82	-0.906346	0.288798	-3.13834	0.00169906	0.042718	signal induced proliferation associated 1 like 1
ENSG00000196821	ILRUN	2397.64	-0.910022	0.276824	-3.28737	0.00101127	0.0287981	inflammation and lipid regulator with UBA-like and NBR1-like domains
ENSG00000112039	FANCE	662.557	-0.914143	0.284467	-3.21353	0.00131112	0.0355692	FA complementation group E
ENSG00000114302	PRKAR2A	1766.94	-0.918966	0.260951	-3.5216	0.000428951	0.0150227	protein kinase cAMP-dependent type II regulatory subunit alpha
ENSG00000084072	PPIE	742.925	-0.921185	0.284155	-3.24184	0.00118762	0.0327144	peptidylprolyl isomerase E
ENSG00000113083	LOX	6851.64	-0.921645	0.258073	-3.57126	0.000355266	0.0129817	lysyl oxidase
ENSG00000142192	APP	6348.92	-0.924871	0.228762	-4.04293	5.28e-05	0.00288596	amyloid beta precursor protein
ENSG00000173473	SMARCC1	2500.74	-0.930076	0.24778	-3.75363	0.000174292	0.00734283	SWI/SNF related	matrix associated	actin dependent regulator of chromatin subfamily c member 1
ENSG00000158710	TAGLN2	6036.15	-0.940591	0.233562	-4.02716	5.65e-05	0.00304005	transgelin 2
ENSG00000096063	SRPK1	6442.77	-0.943231	0.22813	-4.13462	3.56e-05	0.00204532	SRSF protein kinase 1
ENSG00000015133	CCDC88C	497.784	-0.951753	0.303701	-3.13385	0.00172529	0.0430541	coiled-coil domain containing 88C
ENSG00000165138	ANKS6	465.534	-0.958982	0.299698	-3.19983	0.00137511	0.0368858	ankyrin repeat and sterile alpha motif domain containing 6
ENSG00000198171	DDRGK1	677.849	-0.959381	0.302941	-3.16689	0.00154078	0.0402006	DDRGK domain containing 1
ENSG00000164062	APEH	1203.75	-0.962709	0.284477	-3.38413	0.000714033	0.0220903	acylaminoacyl-peptide hydrolase
ENSG00000160216	AGPAT3	900.541	-0.964254	0.271374	-3.55324	0.000380523	0.013799	1-acylglycerol-3-phosphate O-acyltransferase 3
ENSG00000118503	TNFAIP3	1071.3	-0.969565	0.303854	-3.19089	0.00141836	0.037693	TNF alpha induced protein 3
ENSG00000213339	QTRT1	434.078	-0.972431	0.304139	-3.19732	0.0013871	0.037138	queuine tRNA-ribosyltransferase catalytic subunit 1
ENSG00000008083	JARID2	942.184	-0.979491	0.285438	-3.43154	0.000600163	0.0194057	jumonji and AT-rich interaction domain containing 2
ENSG00000214736	TOMM6	3354.74	-0.982347	0.240442	-4.08558	4.4e-05	0.00246005	translocase of outer mitochondrial membrane 6
ENSG00000137413	TAF8	1401.25	-0.99166	0.248058	-3.9977	6.4e-05	0.00334376	TATA-box binding protein associated factor 8
ENSG00000166716	ZNF592	811.768	-0.992648	0.315672	-3.14456	0.00166339	0.0421324	zinc finger protein 592
ENSG00000146223	RPL7L1	10382.3	-0.994454	0.284903	-3.4905	0.000482114	0.016411	ribosomal protein L7 like 1
ENSG00000151388	ADAMTS12	524.526	-0.997256	0.303583	-3.28496	0.00101997	0.0289308	ADAM metallopeptidase with thrombospondin type 1 motif 12
ENSG00000124762	CDKN1A	861.435	-1.00166	0.280318	-3.57332	0.00035249	0.0129587	cyclin dependent kinase inhibitor 1A
ENSG00000099203	TMED1	537.027	-1.00521	0.308748	-3.25575	0.00113095	0.0315783	transmembrane p24 trafficking protein 1
ENSG00000144645	OSBPL10	954.708	-1.02052	0.27987	-3.64642	0.000265921	0.0102947	oxysterol binding protein like 10
ENSG00000114650	SCAP	846.428	-1.02334	0.280307	-3.6508	0.000261422	0.0102407	SREBF chaperone
ENSG00000083857	FAT1	5998.13	-1.02485	0.262431	-3.9052	9.41e-05	0.00445078	FAT atypical cadherin 1
ENSG00000166949	SMAD3	3200.09	-1.03356	0.327151	-3.15927	0.00158164	0.0410216	SMAD family member 3
ENSG00000155313	USP25	721.261	-1.04196	0.273462	-3.81026	0.000138818	0.00609949	ubiquitin specific peptidase 25
ENSG00000138759	FRAS1	720.07	-1.04579	0.277309	-3.77123	0.000162448	0.0069253	Fraser extracellular matrix complex subunit 1
ENSG00000176597	B3GNT5	922.972	-1.05118	0.307301	-3.42068	0.000624644	0.0199228	UDP-GlcNAc:betaGal beta-1	3-N-acetylglucosaminyltransferase 5
ENSG00000184363	PKP3	454.379	-1.05771	0.304754	-3.47071	0.000519092	0.0172918	plakophilin 3
ENSG00000137177	KIF13A	908.976	-1.06879	0.265594	-4.02413	5.72e-05	0.00305646	kinesin family member 13A
ENSG00000096060	FKBP5	1540.19	-1.07118	0.282874	-3.78678	0.00015261	0.0066042	FKBP prolyl isomerase 5
ENSG00000113645	WWC1	1045.96	-1.07252	0.274146	-3.91224	9.14e-05	0.00433714	WW and C2 domain containing 1
ENSG00000136068	FLNB	9778.89	-1.07494	0.239673	-4.48501	7.29e-06	0.000532033	filamin B
ENSG00000178252	WDR6	1714.14	-1.07524	0.245578	-4.37841	1.2e-05	0.000803938	WD repeat domain 6
ENSG00000124733	MEA1	1993.78	-1.08462	0.242415	-4.47424	7.67e-06	0.000549212	male-enhanced antigen 1
ENSG00000164099	PRSS12	404.24	-1.10072	0.31564	-3.48726	0.000487994	0.016564	serine protease 12
ENSG00000140443	IGF1R	1121.87	-1.10302	0.290882	-3.79197	0.000149457	0.00648735	insulin like growth factor 1 receptor
ENSG00000144566	RAB5A	646.636	-1.1044	0.27945	-3.95204	7.75e-05	0.003854	RAB5A	member RAS oncogene family
ENSG00000174839	DENND6A	659.631	-1.10848	0.29087	-3.81091	0.000138455	0.00609949	DENN domain containing 6A
ENSG00000131389	SLC6A6	1300.37	-1.11144	0.344857	-3.2229	0.00126899	0.0346888	solute carrier family 6 member 6
ENSG00000140564	FURIN	1056.42	-1.11759	0.270869	-4.12594	3.69e-05	0.00210707	furin	paired basic amino acid cleaving enzyme
ENSG00000196547	MAN2A2	540.944	-1.12189	0.316059	-3.54962	0.000385784	0.0139193	mannosidase alpha class 2A member 2
ENSG00000100596	SPTLC2	1085.49	-1.12819	0.285885	-3.9463	7.94e-05	0.0038938	serine palmitoyltransferase long chain base subunit 2
ENSG00000173517	PEAK1	684.358	-1.13002	0.285021	-3.96469	7.35e-05	0.00370531	pseudopodium enriched atypical kinase 1
ENSG00000179242	CDH4	479.439	-1.13012	0.325228	-3.47486	0.000511119	0.0171458	cadherin 4
ENSG00000064999	ANKS1A	873.222	-1.13159	0.28148	-4.02012	5.82e-05	0.00309738	ankyrin repeat and sterile alpha motif domain containing 1A
ENSG00000169371	SNUPN	373.649	-1.13454	0.315972	-3.59063	0.000329875	0.0122731	snurportin 1
ENSG00000213066	CEP43	443.931	-1.14081	0.315103	-3.62045	0.000294088	0.0112334	centrosomal protein 43
ENSG00000112624	BICRAL	490.957	-1.14152	0.336955	-3.38775	0.000704675	0.0218727	BICRA like chromatin remodeling complex associated protein
ENSG00000122861	PLAU	8019.62	-1.14255	0.227506	-5.02207	5.11e-07	5.34e-05	plasminogen activator	urokinase
ENSG00000144810	COL8A1	1598.57	-1.14631	0.267497	-4.2853	1.82e-05	0.00114619	collagen type VIII alpha 1 chain
ENSG00000137198	GMPR	257.726	-1.14649	0.352871	-3.24903	0.00115799	0.0321453	guanosine monophosphate reductase
ENSG00000120129	DUSP1	1400.73	-1.14789	0.371506	-3.08983	0.00200273	0.0480992	dual specificity phosphatase 1
ENSG00000131778	CHD1L	502.086	-1.15154	0.300559	-3.83133	0.000127452	0.00572298	chromodomain helicase DNA binding protein 1 like
ENSG00000144724	PTPRG	1174.01	-1.15356	0.269298	-4.2836	1.84e-05	0.00114619	protein tyrosine phosphatase receptor type G
ENSG00000185127	C6orf120	469.224	-1.15923	0.354146	-3.27332	0.0010629	0.0300297	chromosome 6 open reading frame 120
ENSG00000110987	BCL7A	508.19	-1.16026	0.317854	-3.65028	0.000261954	0.0102407	BAF chromatin remodeling complex subunit BCL7A
ENSG00000134775	FHOD3	293.17	-1.16109	0.351004	-3.30791	0.000939957	0.0273102	formin homology 2 domain containing 3
ENSG00000013588	GPRC5A	1674.34	-1.16175	0.27095	-4.28769	1.81e-05	0.00114122	G protein-coupled receptor class C group 5 member A
ENSG00000182952	HMGN4	1765.77	-1.19855	0.253738	-4.72357	2.32e-06	0.000199968	high mobility group nucleosomal binding domain 4
ENSG00000137161	CNPY3	1799.65	-1.19869	0.270828	-4.42602	9.6e-06	0.000667428	canopy FGF signaling regulator 3
ENSG00000103942	HOMER2	472.905	-1.19977	0.338463	-3.54475	0.00039299	0.0140379	homer scaffold protein 2
ENSG00000265972	TXNIP	3379.93	-1.20326	0.358983	-3.35185	0.000802728	0.0243608	thioredoxin interacting protein
ENSG00000131374	TBC1D5	566.241	-1.20438	0.28803	-4.18144	2.9e-05	0.00172169	TBC1 domain family member 5
ENSG00000205269	TMEM170B	1022.83	-1.20586	0.259416	-4.64837	3.35e-06	0.000273845	transmembrane protein 170B
ENSG00000182247	UBE2E2	397.146	-1.21586	0.337151	-3.60627	0.000310631	0.0117401	ubiquitin conjugating enzyme E2 E2
ENSG00000154743	TSEN2	240.552	-1.2226	0.365574	-3.34433	0.00082482	0.0247688	tRNA splicing endonuclease subunit 2
ENSG00000023445	BIRC3	1909.42	-1.22617	0.310198	-3.95287	7.72e-05	0.00385399	baculoviral IAP repeat containing 3
ENSG00000185885	IFITM1	433.297	-1.22721	0.358093	-3.42708	0.000610116	0.0195948	interferon induced transmembrane protein 1
ENSG00000170142	UBE2E1	1795.41	-1.23617	0.2467	-5.01082	5.42e-07	5.63e-05	ubiquitin conjugating enzyme E2 E1
ENSG00000112658	SRF	1939.39	-1.25544	0.309807	-4.05233	5.07e-05	0.00280456	serum response factor
ENSG00000188112	C6orf132	658.324	-1.27264	0.290642	-4.37873	1.19e-05	0.000803938	chromosome 6 open reading frame 132
ENSG00000117262	GPR89A	257.604	-1.27401	0.387071	-3.29142	0.000996836	0.028666	G protein-coupled receptor 89A
ENSG00000204070	SYS1	350.644	-1.29055	0.324679	-3.97486	7.04e-05	0.00358095	SYS1 golgi trafficking protein
ENSG00000111799	COL12A1	2399.31	-1.29255	0.276134	-4.68086	2.86e-06	0.000239302	collagen type XII alpha 1 chain
ENSG00000144597	EAF1	480.273	-1.30026	0.312801	-4.15683	3.23e-05	0.00188664	ELL associated factor 1
ENSG00000132170	PPARG	418.239	-1.30858	0.331599	-3.94627	7.94e-05	0.0038938	peroxisome proliferator activated receptor gamma
ENSG00000138002	IFT172	238.054	-1.3127	0.375988	-3.49132	0.000480633	0.016411	intraflagellar transport 172
ENSG00000206562	METTL6	289.922	-1.3127	0.342028	-3.83799	0.000124046	0.00562288	methyltransferase 6	methylcytidine
ENSG00000011201	ANOS1	504.805	-1.32017	0.314581	-4.19662	2.71e-05	0.00162379	anosmin 1
ENSG00000077097	TOP2B	2369.22	-1.32117	0.250085	-5.28287	1.27e-07	1.63e-05	DNA topoisomerase II beta
ENSG00000073417	PDE8A	870.136	-1.32781	0.324456	-4.09242	4.27e-05	0.00239797	phosphodiesterase 8A
ENSG00000154781	CCDC174	197.122	-1.33417	0.391341	-3.40922	0.000651498	0.0205363	coiled-coil domain containing 174
ENSG00000168137	SETD5	1278.39	-1.34415	0.270657	-4.96626	6.83e-07	6.93e-05	SET domain containing 5
ENSG00000171135	JAGN1	328.498	-1.35217	0.342524	-3.94767	7.89e-05	0.0038938	jagunal homolog 1
ENSG00000129810	SGO1	315.596	-1.36666	0.347731	-3.9302	8.49e-05	0.004066	shugoshin 1
ENSG00000131378	RFTN1	578.462	-1.37413	0.297101	-4.62514	3.74e-06	0.000299562	raftlin	lipid raft linker 1
ENSG00000103381	CPPED1	344.683	-1.37863	0.341526	-4.03667	5.42e-05	0.00295282	calcineurin like phosphoesterase domain containing 1
ENSG00000197442	MAP3K5	355.859	-1.38276	0.34158	-4.04814	5.16e-05	0.00283326	mitogen-activated protein kinase kinase kinase 5
ENSG00000151092	NGLY1	393.333	-1.38801	0.333197	-4.16574	3.1e-05	0.00182935	N-glycanase 1
ENSG00000132155	RAF1	1127.61	-1.3902	0.272179	-5.10769	3.26e-07	3.65e-05	Raf-1 proto-oncogene	serine/threonine kinase
ENSG00000249992	TMEM158	484.821	-1.39126	0.322522	-4.31369	1.61e-05	0.00103126	transmembrane protein 158
ENSG00000135373	EHF	1260.09	-1.40151	0.320968	-4.36652	1.26e-05	0.000837188	ETS homologous factor
ENSG00000206560	ANKRD28	1819.79	-1.4041	0.241388	-5.81678	6e-09	1.05e-06	ankyrin repeat domain 28
ENSG00000134072	CAMK1	223.032	-1.40581	0.382078	-3.67939	0.000233793	0.00938054	calcium/calmodulin dependent protein kinase I
ENSG00000157020	SEC13	1146.23	-1.41147	0.28774	-4.90538	9.32e-07	9.28e-05	SEC13 homolog	nuclear pore and COPII coat complex component
ENSG00000196639	HRH1	483.152	-1.41394	0.297434	-4.7538	2e-06	0.000175431	histamine receptor H1
ENSG00000163820	FYCO1	554.004	-1.42033	0.329908	-4.30524	1.67e-05	0.00106194	FYVE and coiled-coil domain autophagy adaptor 1
ENSG00000154813	DPH3	462.833	-1.42648	0.309273	-4.61235	3.98e-06	0.000315077	diphthamide biosynthesis 3
ENSG00000156990	RPUSD3	259.262	-1.42683	0.358968	-3.97481	7.04e-05	0.00358095	RNA pseudouridine synthase D3
ENSG00000170860	LSM3	1071.18	-1.42985	0.278146	-5.14066	2.74e-07	3.16e-05	LSM3 homolog	U6 small nuclear RNA and mRNA degradation associated
ENSG00000140545	MFGE8	1260.6	-1.43379	0.252315	-5.68254	1.33e-08	2.18e-06	milk fat globule EGF and factor V/VIII domain containing
ENSG00000140367	UBE2Q2	622.241	-1.43904	0.286375	-5.02502	5.03e-07	5.3e-05	ubiquitin conjugating enzyme E2 Q2
ENSG00000125037	EMC3	543.479	-1.441	0.301734	-4.77573	1.79e-06	0.0001603	ER membrane protein complex subunit 3
ENSG00000172201	ID4	185.331	-1.44495	0.395536	-3.65314	0.000259053	0.0102372	inhibitor of DNA binding 4
ENSG00000144554	FANCD2	512.374	-1.45417	0.31518	-4.61376	3.95e-06	0.000314683	FA complementation group D2
ENSG00000156983	BRPF1	389.093	-1.45973	0.379965	-3.84174	0.000122164	0.00555518	bromodomain and PHD finger containing 1
ENSG00000174738	NR1D2	1061.42	-1.4783	0.259843	-5.6892	1.28e-08	2.13e-06	nuclear receptor subfamily 1 group D member 2
ENSG00000134668	SPOCD1	175.848	-1.48609	0.442206	-3.36063	0.000777655	0.0238015	SPOC domain containing 1
ENSG00000154814	OXNAD1	246.228	-1.49082	0.372279	-4.00456	6.21e-05	0.00326002	oxidoreductase NAD binding domain containing 1
ENSG00000183691	NOG	610.692	-1.49087	0.325261	-4.5836	4.57e-06	0.000359699	noggin
ENSG00000182240	BACE2	283.915	-1.49196	0.350799	-4.25303	2.11e-05	0.00129099	beta-secretase 2
ENSG00000131368	MRPS25	400.594	-1.49865	0.317845	-4.71504	2.42e-06	0.000206051	mitochondrial ribosomal protein S25
ENSG00000254999	BRK1	1390.64	-1.5001	0.248234	-6.04309	1.51e-09	2.97e-07	BRICK1 subunit of SCAR/WAVE actin nucleating complex
ENSG00000137434	C6orf52	218.724	-1.50253	0.39538	-3.80022	0.000144565	0.00629408	chromosome 6 open reading frame 52
ENSG00000154767	XPC	226.324	-1.51205	0.395054	-3.82745	0.000129478	0.00579577	XPC complex subunit	DNA damage recognition and repair factor
ENSG00000169814	BTD	192.226	-1.5121	0.386448	-3.91281	9.12e-05	0.00433714	biotinidase
ENSG00000206573	THUMPD3-AS1	156.805	-1.51277	0.456913	-3.31086	0.0009301	0.0272449	THUMPD3 antisense RNA 1
ENSG00000137203	TFAP2A	183.611	-1.51664	0.423895	-3.57788	0.000346398	0.0128212	transcription factor AP-2 alpha
ENSG00000104331	BPNT2	1347.68	-1.51958	0.272081	-5.58502	2.34e-08	3.64e-06	3'(2')	5'-bisphosphate nucleotidase 2
ENSG00000054598	FOXC1	405.55	-1.52238	0.403515	-3.7728	0.000161423	0.00690214	forkhead box C1
ENSG00000070950	RAD18	1063.17	-1.52398	0.291078	-5.23565	1.64e-07	2.01e-05	RAD18 E3 ubiquitin protein ligase
ENSG00000197594	ENPP1	1167.2	-1.5244	0.325802	-4.67892	2.88e-06	0.000240164	ectonucleotide pyrophosphatase/phosphodiesterase 1
ENSG00000131381	RBSN	450.783	-1.53556	0.316973	-4.84445	1.27e-06	0.000118729	rabenosyn	RAB effector
ENSG00000154237	LRRK1	150.23	-1.54582	0.44504	-3.47344	0.00051384	0.0171968	leucine rich repeat kinase 1
ENSG00000143126	CELSR2	160.446	-1.55145	0.480948	-3.22581	0.00125617	0.0344041	cadherin EGF LAG seven-pass G-type receptor 2
ENSG00000122641	INHBA	217.089	-1.55347	0.410339	-3.78583	0.000153197	0.0066096	inhibin subunit beta A
ENSG00000134086	VHL	855.175	-1.56536	0.284137	-5.50918	3.61e-08	5.27e-06	von Hippel-Lindau tumor suppressor
ENSG00000023892	DEF6	430.232	-1.58601	0.333186	-4.76013	1.93e-06	0.000171066	DEF6 guanine nucleotide exchange factor
ENSG00000144713	RPL32	6889.72	-1.58623	0.244231	-6.4948	8.31e-11	2.02e-08	ribosomal protein L32
ENSG00000174748	RPL15	14585.5	-1.60596	0.22871	-7.02181	2.19e-12	7.44e-10	ribosomal protein L15
ENSG00000134077	THUMPD3	481.818	-1.60857	0.305827	-5.25975	1.44e-07	1.82e-05	THUMP domain containing 3
ENSG00000167173	C15orf39	426.062	-1.61259	0.307269	-5.24813	1.54e-07	1.91e-05	chromosome 15 open reading frame 39
ENSG00000154654	NCAM2	243.482	-1.61719	0.380774	-4.24713	2.17e-05	0.00131422	neural cell adhesion molecule 2
ENSG00000157657	ZNF618	228.775	-1.62877	0.381648	-4.26772	1.97e-05	0.00121404	zinc finger protein 618
ENSG00000131375	CAPN7	513.191	-1.63338	0.295162	-5.53386	3.13e-08	4.72e-06	calpain 7
ENSG00000241553	ARPC4	1386.14	-1.63486	0.271564	-6.02017	1.74e-09	3.33e-07	actin related protein 2/3 complex subunit 4
ENSG00000114166	KAT2B	396.348	-1.64387	0.324621	-5.06397	4.11e-07	4.42e-05	lysine acetyltransferase 2B
ENSG00000197885	NKIRAS1	266.22	-1.67146	0.372471	-4.4875	7.21e-06	0.000529364	NFKB inhibitor interacting Ras like 1
ENSG00000171148	TADA3	1512.31	-1.67281	0.254846	-6.56401	5.24e-11	1.36e-08	transcriptional adaptor 3
ENSG00000007944	MYLIP	411.683	-1.68456	0.340209	-4.95155	7.36e-07	7.4e-05	myosin regulatory light chain interacting protein
ENSG00000169604	ANTXR1	1863.07	-1.69354	0.241276	-7.01912	2.23e-12	7.44e-10	ANTXR cell adhesion molecule 1
ENSG00000181634	TNFSF15	2600.18	-1.69632	0.385821	-4.39666	1.1e-05	0.000749827	TNF superfamily member 15
ENSG00000075975	MKRN2	613.127	-1.71038	0.314723	-5.43455	5.49e-08	7.57e-06	makorin ring finger protein 2
ENSG00000182022	CHST15	174.122	-1.71356	0.418375	-4.09574	4.21e-05	0.00237316	carbohydrate sulfotransferase 15
ENSG00000174233	ADCY6	192.257	-1.76179	0.462266	-3.81121	0.000138289	0.00609949	adenylate cyclase 6
ENSG00000170876	TMEM43	1473.81	-1.7776	0.25472	-6.97865	2.98e-12	9.7e-10	transmembrane protein 43
ENSG00000163719	MTMR14	486.113	-1.78071	0.326603	-5.4522	4.98e-08	7.06e-06	myotubularin related protein 14
ENSG00000170542	SERPINB9	153.381	-1.78164	0.42111	-4.23082	2.33e-05	0.00140724	serpin family B member 9
ENSG00000134070	IRAK2	143.919	-1.83895	0.534448	-3.44083	0.000579923	0.0189653	interleukin 1 receptor associated kinase 2
ENSG00000159167	STC1	1268.73	-1.84014	0.408611	-4.50341	6.69e-06	0.000504137	stanniocalcin 1
ENSG00000167994	RAB3IL1	70.5021	-1.84332	0.584095	-3.15586	0.00160028	0.0412028	RAB3A interacting protein like 1
ENSG00000163528	CHCHD4	300.501	-1.84483	0.339229	-5.43832	5.38e-08	7.48e-06	coiled-coil-helix-coiled-coil-helix domain containing 4
ENSG00000144559	TAMM41	82.7368	-1.84712	0.576795	-3.20239	0.00136292	0.0366275	TAM41 mitochondrial translocator assembly and maintenance homolog
ENSG00000157014	TATDN2	699.337	-1.88696	0.319706	-5.90218	3.59e-09	6.5e-07	TatD DNase domain containing 2
ENSG00000154822	PLCL2	95.3921	-1.88821	0.569974	-3.3128	0.000923683	0.0271124	phospholipase C like 2
ENSG00000096696	DSP	3612.37	-1.91263	0.243531	-7.85374	4.04e-15	1.99e-12	desmoplakin
ENSG00000225733	FGD5-AS1	1812.5	-1.94097	0.246315	-7.88004	3.27e-15	1.7e-12	FGD5 antisense RNA 1
ENSG00000006453	BAIAP2L1	150.546	-1.97863	0.463294	-4.27079	1.95e-05	0.0012026	BAR/IMD domain containing adaptor protein 2 like 1
ENSG00000163702	IL17RC	203.544	-2.02076	0.390391	-5.17624	2.26e-07	2.64e-05	interleukin 17 receptor C
ENSG00000221869	CEBPD	205.048	-2.0226	0.534868	-3.78148	0.000155896	0.00670586	CCAAT enhancer binding protein delta
ENSG00000134363	FST	2537.16	-2.03757	0.376263	-5.41527	6.12e-08	8.2e-06	follistatin
ENSG00000121966	CXCR4	981.683	-2.07546	0.333885	-6.21609	5.1e-10	1.09e-07	C-X-C motif chemokine receptor 4
ENSG00000163701	IL17RE	100.649	-2.08754	0.520976	-4.00697	6.15e-05	0.00323881	interleukin 17 receptor E
ENSG00000197385	ZNF860	85.1595	-2.11105	0.554531	-3.80691	0.000140711	0.00616376	zinc finger protein 860
ENSG00000163412	EIF4E3	48.5498	-2.1483	0.680192	-3.15837	0.00158657	0.0410216	eukaryotic translation initiation factor 4E family member 3
ENSG00000166741	NNMT	137.43	-2.14938	0.442738	-4.85474	1.21e-06	0.000115113	nicotinamide N-methyltransferase
ENSG00000225362	CT62	46.8421	-2.15708	0.69819	-3.08954	0.00200469	0.0480992	cancer/testis associated 62
ENSG00000163376	KBTBD8	55.2848	-2.18348	0.653868	-3.33934	0.00083979	0.0251436	kelch repeat and BTB domain containing 8
ENSG00000023191	RNH1	218.703	-2.22371	0.565013	-3.93568	8.3e-05	0.00401708	ribonuclease/angiogenin inhibitor 1
ENSG00000180573	H2AC6	211.187	-2.23916	0.556366	-4.02461	5.71e-05	0.00305646	H2A clustered histone 6
ENSG00000276234	TADA2A	119.302	-2.27014	0.569285	-3.9877	6.67e-05	0.00345002	transcriptional adaptor 2A
ENSG00000198910	L1CAM	369.107	-2.27616	0.400744	-5.67984	1.35e-08	2.19e-06	L1 cell adhesion molecule
ENSG00000154760	SLFN13	116.106	-2.32481	0.478839	-4.85511	1.2e-06	0.000115113	schlafen family member 13
ENSG00000074410	CA12	195.272	-2.34099	0.49822	-4.69871	2.62e-06	0.000221907	carbonic anhydrase 12
ENSG00000150551	LYPD1	64.249	-2.37367	0.621461	-3.8195	0.000133722	0.00596708	LY6/PLAUR domain containing 1
ENSG00000009694	TENM1	297.244	-2.45618	0.368942	-6.65735	2.79e-11	7.83e-09	teneurin transmembrane protein 1
ENSG00000109321	AREG	721.335	-2.53255	0.348363	-7.26986	3.6e-13	1.32e-10	amphiregulin
ENSG00000196730	DAPK1	134.696	-2.53989	0.479707	-5.29468	1.19e-07	1.54e-05	death associated protein kinase 1
ENSG00000003137	CYP26B1	210.017	-2.59334	0.387949	-6.68476	2.31e-11	6.76e-09	cytochrome P450 family 26 subfamily B member 1
ENSG00000170786	SDR16C5	187.827	-2.61071	0.472972	-5.51979	3.39e-08	5.01e-06	short chain dehydrogenase/reductase family 16C member 5
ENSG00000183317	EPHA10	34.0584	-2.61263	0.833663	-3.13392	0.00172489	0.0430541	EPH receptor A10
ENSG00000103888	CEMIP	57.2916	-2.64196	0.707139	-3.73613	0.000186876	0.00773646	cell migration inducing hyaluronidase 1
ENSG00000170577	SIX2	40.3234	-2.71564	0.778931	-3.48637	0.000489621	0.01658	SIX homeobox 2
ENSG00000137642	SORL1	85.4592	-2.72053	0.569565	-4.77651	1.78e-06	0.0001603	sortilin related receptor 1
ENSG00000140450	ARRDC4	185.434	-2.77701	0.423918	-6.55082	5.72e-11	1.46e-08	arrestin domain containing 4
ENSG00000185860	CCDC190	247.424	-2.79799	0.380024	-7.36266	1.8e-13	7.17e-11	coiled-coil domain containing 190
ENSG00000168676	KCTD19	32.3302	-2.85151	0.889451	-3.20591	0.00134634	0.0363182	potassium channel tetramerization domain containing 19
ENSG00000196739	COL27A1	66.8419	-2.87376	0.782813	-3.67107	0.000241538	0.00963728	collagen type XXVII alpha 1 chain
ENSG00000165868	HSPA12A	118.002	-2.88474	0.554592	-5.20155	1.98e-07	2.34e-05	heat shock protein family A (Hsp70) member 12A
ENSG00000163131	CTSS	104.779	-2.92112	0.603107	-4.84345	1.28e-06	0.000118729	cathepsin S
ENSG00000019582	CD74	319.556	-2.9284	0.422506	-6.93104	4.18e-12	1.33e-09	CD74 molecule
ENSG00000111859	NEDD9	139.868	-3.00213	0.50321	-5.96595	2.43e-09	4.47e-07	neural precursor cell expressed	developmentally down-regulated 9
ENSG00000126785	RHOJ	123.333	-3.00524	0.509814	-5.89478	3.75e-09	6.72e-07	ras homolog family member J
ENSG00000120149	MSX2	27.1829	-3.02007	0.917076	-3.29315	0.000990711	0.0285532	msh homeobox 2
ENSG00000189337	KAZN	70.1427	-3.05323	0.677725	-4.50511	6.63e-06	0.00050277	kazrin	periplakin interacting protein
ENSG00000109107	ALDOC	84.2807	-3.08431	0.675612	-4.56521	4.99e-06	0.000390575	aldolase	fructose-bisphosphate C
ENSG00000119514	GALNT12	37.6876	-3.08701	0.861758	-3.58223	0.00034068	0.0126422	polypeptide N-acetylgalactosaminyltransferase 12
ENSG00000144749	LRIG1	93.7859	-3.11281	0.536832	-5.79847	6.69e-09	1.15e-06	leucine rich repeats and immunoglobulin like domains 1
ENSG00000272620	AFAP1-AS1	51.312	-3.16115	0.725171	-4.35919	1.31e-05	0.000857778	AFAP1 antisense RNA 1
ENSG00000139946	PELI2	87.7518	-3.19593	0.712707	-4.48421	7.32e-06	0.000532033	pellino E3 ubiquitin protein ligase family member 2
ENSG00000155307	SAMSN1	57.0929	-3.2206	0.718375	-4.48317	7.35e-06	0.000532033	SAM domain	SH3 domain and nuclear localization signals 1
ENSG00000158457	TSPAN33	27.023	-3.22262	1.01216	-3.18391	0.00145299	0.0383997	tetraspanin 33
ENSG00000112299	VNN1	97.0118	-3.24653	0.822135	-3.9489	7.85e-05	0.00389129	vanin 1
ENSG00000227372	TP73-AS1	71.2441	-3.25362	0.613382	-5.30439	1.13e-07	1.49e-05	TP73 antisense RNA 1
ENSG00000163283	ALPP	31.6014	-3.3915	0.929034	-3.65057	0.00026166	0.0102407	alkaline phosphatase	placental
ENSG00000089127	OAS1	28.8107	-3.45782	0.983166	-3.51703	0.000436408	0.0152466	2'-5'-oligoadenylate synthetase 1
ENSG00000187908	DMBT1	21.5858	-3.49021	1.1148	-3.13078	0.00174341	0.0434305	deleted in malignant brain tumors 1
ENSG00000147697	GSDMC	31.7977	-3.51326	0.994687	-3.53202	0.000412391	0.0146215	gasdermin C
ENSG00000089177	KIF16B	53.7292	-3.57579	0.756679	-4.72564	2.29e-06	0.000199139	kinesin family member 16B
ENSG00000188910	GJB3	23.3195	-3.58339	1.05784	-3.38744	0.000705473	0.0218727	gap junction protein beta 3
ENSG00000215845	TSTD1	59.8276	-3.59764	0.688588	-5.22467	1.74e-07	2.1e-05	thiosulfate sulfurtransferase like domain containing 1
ENSG00000180914	OXTR	44.3056	-3.60036	0.763505	-4.71557	2.41e-06	0.000206051	oxytocin receptor
ENSG00000140379	BCL2A1	28.441	-3.72337	1.14127	-3.26249	0.0011044	0.0309577	BCL2 related protein A1
ENSG00000154330	PGM5	182.039	-3.72855	0.445743	-8.36479	6.02e-17	4.31e-14	phosphoglucomutase 5
ENSG00000170500	LONRF2	31.2297	-3.76434	1.18346	-3.1808	0.00146871	0.0387435	LON peptidase N-terminal domain and ring finger 2
ENSG00000173698	ADGRG2	18.3483	-3.85624	1.18064	-3.26624	0.00108987	0.0306706	adhesion G protein-coupled receptor G2
ENSG00000165943	MOAP1	27.7159	-3.85955	1.00618	-3.83586	0.000125128	0.00565404	modulator of apoptosis 1
ENSG00000157045	NTAN1	75.8825	-3.89339	0.87919	-4.42839	9.49e-06	0.000663375	N-terminal asparagine amidase
ENSG00000046653	GPM6B	21.8582	-3.89932	1.13519	-3.43494	0.000592688	0.0192509	glycoprotein M6B
ENSG00000006757	PNPLA4	87.4761	-3.92643	0.639725	-6.13769	8.37e-10	1.74e-07	patatin like phospholipase domain containing 4
ENSG00000166689	PLEKHA7	153.438	-3.9835	0.465747	-8.55294	1.2e-17	9.55e-15	pleckstrin homology domain containing A7
ENSG00000101333	PLCB4	128.131	-3.98725	0.538698	-7.40165	1.35e-13	5.5e-11	phospholipase C beta 4
ENSG00000112584	FAM120B	31.8669	-4.05273	1.2087	-3.35298	0.000799473	0.0243608	family with sequence similarity 120B
ENSG00000143061	IGSF3	79.5869	-4.11969	0.68786	-5.98914	2.11e-09	3.98e-07	immunoglobulin superfamily member 3
ENSG00000115226	FNDC4	61.4735	-4.19985	0.692872	-6.06151	1.35e-09	2.72e-07	fibronectin type III domain containing 4
ENSG00000165323	FAT3	261.55	-4.31562	0.392478	-10.9958	4e-28	1.15e-24	FAT atypical cadherin 3
ENSG00000101210	EEF1A2	28.6612	-4.31583	1.11681	-3.86444	0.000111345	0.00514486	eukaryotic translation elongation factor 1 alpha 2
ENSG00000168077	SCARA3	17.0727	-4.3688	1.29487	-3.37392	0.000741051	0.0228768	scavenger receptor class A member 3
ENSG00000169933	FRMPD4	57.9616	-4.4229	0.773749	-5.71619	1.09e-08	1.84e-06	FERM and PDZ domain containing 4
ENSG00000173432	SAA1	23.2511	-4.50064	1.24967	-3.60146	0.000316435	0.0119279	serum amyloid A1
ENSG00000176658	MYO1D	28.2444	-4.50096	1.02068	-4.40976	1.03e-05	0.000709259	myosin ID
ENSG00000135363	LMO2	47.9876	-4.52561	0.835729	-5.41516	6.12e-08	8.2e-06	LIM domain only 2
ENSG00000115919	KYNU	101.565	-4.54368	0.733159	-6.19741	5.74e-10	1.21e-07	kynureninase
ENSG00000162366	PDZK1IP1	48.8433	-4.55026	0.813252	-5.59514	2.2e-08	3.51e-06	PDZK1 interacting protein 1
ENSG00000163638	ADAMTS9	101.254	-4.55209	0.646096	-7.04553	1.85e-12	6.62e-10	ADAM metallopeptidase with thrombospondin type 1 motif 9
ENSG00000105699	LSR	216.247	-4.75018	0.436825	-10.8743	1.53e-27	3.65e-24	lipolysis stimulated lipoprotein receptor
ENSG00000178826	TMEM139	33.7469	-4.79097	1.0658	-4.49518	6.95e-06	0.000518091	transmembrane protein 139
ENSG00000229676	ZNF492	86.5901	-4.79371	0.736893	-6.5053	7.75e-11	1.91e-08	zinc finger protein 492
ENSG00000153779	TGIF2LX	23.4609	-4.8181	1.225	-3.93315	8.38e-05	0.00404349	TGFB induced factor homeobox 2 like X-linked
ENSG00000137571	SLCO5A1	17.5541	-4.8252	1.40115	-3.44374	0.000573719	0.0188054	solute carrier organic anion transporter family member 5A1
ENSG00000226629	LINC00974	19.0876	-4.94571	1.35522	-3.64939	0.000262868	0.0102407	long intergenic non-protein coding RNA 974
ENSG00000170373	CST1	39.053	-5.01368	1.07962	-4.64393	3.42e-06	0.000278219	cystatin SN
ENSG00000087258	GNAO1	34.2167	-5.05529	1.02111	-4.95078	7.39e-07	7.4e-05	G protein subunit alpha o1
ENSG00000226887	ERVMER34-1	14.2502	-5.13489	1.57762	-3.25484	0.00113458	0.0316181	endogenous retrovirus group MER34 member 1	envelope
ENSG00000268916	CSAG3	16.0408	-5.30287	1.57622	-3.3643	0.00076739	0.0235882	CSAG family member 3
ENSG00000149573	MPZL2	144.561	-5.39878	0.717952	-7.5197	5.49e-14	2.38e-11	myelin protein zero like 2
ENSG00000071242	RPS6KA2	147.458	-6.35623	0.668121	-9.51359	1.84e-21	2.9e-18	ribosomal protein S6 kinase A2
ENSG00000165474	GJB2	32.7582	-6.36537	1.34409	-4.73582	2.18e-06	0.000190554	gap junction protein beta 2
ENSG00000108691	CCL2	36.2699	-6.49399	1.28453	-5.05554	4.29e-07	4.55e-05	C-C motif chemokine ligand 2
ENSG00000269067	ZNF728	8.14307	-6.80623	2.16358	-3.14582	0.00165625	0.042064	zinc finger protein 728
ENSG00000154096	THY1	45.4805	-6.81568	1.24184	-5.48835	4.06e-08	5.87e-06	Thy-1 cell surface antigen
ENSG00000279516	FAM230C	8.80056	-6.91403	2.11288	-3.27232	0.00106668	0.0300769	family with sequence similarity 230 member C
ENSG00000101670	LIPG	9.47155	-7.03395	2.12765	-3.30598	0.000946453	0.0274433	lipase G	endothelial type
ENSG00000100739	BDKRB1	10.3225	-7.12216	2.10195	-3.38836	0.000703129	0.0218727	bradykinin receptor B1
ENSG00000095587	TLL2	10.5641	-7.18191	2.02487	-3.54685	0.000389866	0.0139961	tolloid like 2
ENSG00000155495	MAGEC1	11.4363	-7.28663	1.97971	-3.68066	0.000232628	0.00938054	MAGE family member C1
ENSG00000224960	PPP4R3C	12.554	-7.43898	1.98603	-3.74565	0.000179926	0.00753587	protein phosphatase 4 regulatory subunit 3C
ENSG00000261156	LINC01989	13.4184	-7.52005	1.91064	-3.93588	8.29e-05	0.00401708	long intergenic non-protein coding RNA 1989
ENSG00000078053	AMPH	13.8535	-7.56129	1.90022	-3.97917	6.92e-05	0.00356325	amphiphysin
ENSG00000160191	PDE9A	14.5187	-7.63417	1.88001	-4.06071	4.89e-05	0.00271623	phosphodiesterase 9A
ENSG00000137261	KIAA0319	18.2548	-7.96181	1.80136	-4.41989	9.88e-06	0.000683354	KIAA0319
ENSG00000137573	SULF1	18.481	-7.98422	1.79852	-4.43932	9.02e-06	0.000636761	sulfatase 1
ENSG00000268606	MAGEA2	18.9238	-8.02033	1.79379	-4.47117	7.78e-06	0.000554384	MAGE family member A2
ENSG00000197213	ZSCAN5B	20.44	-8.11606	1.78688	-4.54203	5.57e-06	0.000433729	zinc finger and SCAN domain containing 5B
ENSG00000182983	ZNF662	20.931	-8.17757	1.85294	-4.4133	1.02e-05	0.000701087	zinc finger protein 662
ENSG00000197134	ZNF257	21.7684	-8.21251	1.75374	-4.68286	2.83e-06	0.000238371	zinc finger protein 257
ENSG00000113249	HAVCR1	22.4143	-8.24745	1.77129	-4.65617	3.22e-06	0.00026519	hepatitis A virus cellular receptor 1
ENSG00000259611	LINC01582	26.6048	-8.5015	1.70535	-4.9852	6.19e-07	6.33e-05	long intergenic non-protein coding RNA 1582
ENSG00000175928	LRRN1	35.6856	-8.94443	1.70959	-5.23191	1.68e-07	2.04e-05	leucine rich repeat neuronal 1
ENSG00000075340	ADD2	39.3599	-9.06749	1.62968	-5.56397	2.64e-08	4.04e-06	adducin 2
ENSG00000156959	LHFPL4	42.6955	-9.19582	1.62209	-5.66913	1.44e-08	2.31e-06	LHFPL tetraspan subfamily member 4
ENSG00000197172	MAGEA6	58.2471	-9.62909	1.59144	-6.05055	1.44e-09	2.87e-07	MAGE family member A6
ENSG00000206190	ATP10A	73.431	-9.96588	1.55928	-6.39132	1.64e-10	3.8e-08	ATPase phospholipid transporting 10A (putative)
ENSG00000134247	PTGFRN	93.5072	-10.3231	1.53405	-6.7293	1.7e-11	5.09e-09	prostaglandin F2 receptor inhibitor
ENSG00000140563	MCTP2	452.707	-11.1559	1.48075	-7.53392	4.92e-14	2.2e-11	multiple C2 and transmembrane domain containing 2
ENSG00000140937	CDH11	258.42	-11.7915	1.50249	-7.84795	4.23e-15	2.02e-12	cadherin 11
ENSG00000221867	MAGEA3	584.771	-12.964	1.47411	-8.79444	1.44e-18	1.29e-15	MAGE family member A3
ENSG00000150403	TMCO3	1705.2	0.868486	0.283066	3.06814	0.00215398	0.0511669	transmembrane and coiled-coil domains 3
ENSG00000136156	ITM2B	2496.85	0.78873	0.257503	3.06299	0.00219135	0.051927	integral membrane protein 2B
ENSG00000144711	IQSEC1	247.35	-1.14917	0.375211	-3.06274	0.00219323	0.051927	IQ motif and Sec7 domain ArfGEF 1
ENSG00000179299	NSUN7	43.2092	2.28155	0.745182	3.06173	0.00220061	0.0520157	NOP2/Sun RNA methyltransferase family member 7
ENSG00000143194	MAEL	27.5861	3.3562	1.09845	3.05539	0.0022477	0.0530414	maelstrom spermatogenic transposon silencer
ENSG00000171467	ZNF318	821.778	-0.834039	0.273391	-3.05072	0.00228296	0.0537848	zinc finger protein 318
ENSG00000077232	DNAJC10	3168.62	0.715034	0.234666	3.04702	0.0023112	0.0542856	DnaJ heat shock protein family (Hsp40) member C10
ENSG00000144824	PHLDB2	2164.76	0.810426	0.26598	3.04695	0.0023118	0.0542856	pleckstrin homology like domain family B member 2
ENSG00000170689	HOXB9	231.683	-1.15603	0.379562	-3.0457	0.00232139	0.0544216	homeobox B9
ENSG00000172845	SP3	2631.1	0.719058	0.236145	3.04498	0.00232694	0.0544626	Sp3 transcription factor
ENSG00000164850	GPER1	70.6134	1.80228	0.592163	3.04354	0.00233809	0.0545392	G protein-coupled estrogen receptor 1
ENSG00000132970	WASF3	188.606	-1.29695	0.426217	-3.04293	0.00234288	0.0545392	WASP family member 3
ENSG00000114742	WDR48	850.46	-0.886487	0.291344	-3.04275	0.00234429	0.0545392	WD repeat domain 48
ENSG00000113578	FGF1	458.839	1.14244	0.375483	3.0426	0.00234545	0.0545392	fibroblast growth factor 1
ENSG00000102471	NDFIP2	1474.39	0.783897	0.257742	3.0414	0.00235479	0.0546678	Nedd4 family interacting protein 2
ENSG00000103051	COG4	938.229	0.813003	0.267627	3.03782	0.00238295	0.0552319	component of oligomeric golgi complex 4
ENSG00000112541	PDE10A	140.804	-6.14841	2.02429	-3.03732	0.00238691	0.0552343	phosphodiesterase 10A
ENSG00000019186	CYP24A1	231.076	-1.17651	0.387561	-3.03567	0.00240003	0.0554483	cytochrome P450 family 24 subfamily A member 1
ENSG00000112320	SOBP	17.4285	4.06358	1.33897	3.03485	0.00240657	0.0555099	sine oculis binding protein homolog
ENSG00000187566	NHLRC1	7.93034	-6.77881	2.23483	-3.03326	0.0024193	0.0556359	NHL repeat containing E3 ubiquitin protein ligase 1
ENSG00000092758	COL9A3	9.13213	6.31833	2.08306	3.03319	0.00241979	0.0556359	collagen type IX alpha 3 chain
ENSG00000136379	ABHD17C	712.94	-0.890854	0.293905	-3.0311	0.00243665	0.0559337	abhydrolase domain containing 17C	depalmitoylase
ENSG00000169047	IRS1	1813.96	0.778022	0.256783	3.02988	0.00244649	0.0559934	insulin receptor substrate 1
ENSG00000166710	B2M	2519.7	0.961453	0.317331	3.02981	0.00244707	0.0559934	beta-2-microglobulin
ENSG00000065675	PRKCQ	17.9046	-3.56638	1.17839	-3.0265	0.00247403	0.0564637	protein kinase C theta
ENSG00000064012	CASP8	582.796	1.0697	0.353465	3.02632	0.00247551	0.0564637	caspase 8
ENSG00000127329	PTPRB	39.7325	-2.62672	0.868119	-3.02576	0.00248008	0.0564779	protein tyrosine phosphatase receptor type B
ENSG00000065029	ZNF76	823.453	-0.808022	0.267968	-3.01537	0.00256669	0.0583576	zinc finger protein 76
ENSG00000079999	KEAP1	1507.38	-0.963498	0.319803	-3.01279	0.00258861	0.0586087	kelch like ECH associated protein 1
ENSG00000111713	GYS2	19.4937	3.57701	1.18732	3.01268	0.00258953	0.0586087	glycogen synthase 2
ENSG00000142949	PTPRF	5505.95	-0.68583	0.227652	-3.01262	0.00259001	0.0586087	protein tyrosine phosphatase receptor type F
ENSG00000291076	AADACP1	32.2572	2.7498	0.912972	3.01192	0.00259598	0.0586512	arylacetamide deacetylase pseudogene 1
ENSG00000143384	MCL1	6875.81	-0.683267	0.226954	-3.01061	0.00260728	0.0587755	MCL1 apoptosis regulator	BCL2 family member
ENSG00000178409	BEND3	243.259	-1.11935	0.371838	-3.01032	0.00260969	0.0587755	BEN domain containing 3
ENSG00000090861	AARS1	2712.44	1.01693	0.338199	3.00689	0.0026394	0.0593512	alanyl-tRNA synthetase 1
ENSG00000016864	GLT8D1	816.887	-0.827782	0.275432	-3.0054	0.00265234	0.0594352	glycosyltransferase 8 domain containing 1
ENSG00000141524	TMC6	656.972	0.984157	0.327488	3.00517	0.00265431	0.0594352	transmembrane channel like 6
ENSG00000068001	HYAL2	392.934	-0.980433	0.326307	-3.00463	0.00265904	0.0594352	hyaluronidase 2
ENSG00000148908	RGS10	907.523	0.844542	0.281088	3.00455	0.00265973	0.0594352	regulator of G protein signaling 10
ENSG00000107262	BAG1	1068.6	-0.80752	0.269053	-3.00134	0.00268797	0.059914	BAG cochaperone 1
ENSG00000071575	TRIB2	758.364	1.29441	0.431302	3.00116	0.00268952	0.059914	tribbles pseudokinase 2
ENSG00000188243	COMMD6	819.916	0.80147	0.267106	3.00057	0.00269476	0.0599375	COMM domain containing 6
ENSG00000105290	APLP1	110.127	1.46316	0.488215	2.99695	0.00272693	0.0604284	amyloid beta precursor like protein 1
ENSG00000117899	MESD	1037.22	-0.793694	0.264853	-2.99674	0.00272883	0.0604284	mesoderm development LRP chaperone
ENSG00000188848	BEND4	16.615	4.48356	1.49618	2.99667	0.00272949	0.0604284	BEN domain containing 4
ENSG00000165029	ABCA1	315.212	-1.61112	0.538063	-2.99429	0.00275083	0.0607285	ATP binding cassette subfamily A member 1
ENSG00000163703	CRELD1	172.905	-1.31414	0.438979	-2.99363	0.00275681	0.0607285	cysteine rich with EGF like domains 1
ENSG00000082781	ITGB5	1496.63	-0.84705	0.282966	-2.99347	0.00275824	0.0607285	integrin subunit beta 5
ENSG00000065534	MYLK	868.753	0.91147	0.304506	2.99328	0.00276	0.0607285	myosin light chain kinase
ENSG00000182149	IST1	1741.25	0.754189	0.25201	2.99269	0.00276528	0.0607514	IST1 factor associated with ESCRT-III
ENSG00000134343	ANO3	9.25329	6.33778	2.11958	2.99012	0.0027887	0.0611721	anoctamin 3
ENSG00000177463	NR2C2	136.548	-1.3423	0.44905	-2.98919	0.00279716	0.0612637	nuclear receptor subfamily 2 group C member 2
ENSG00000114026	OGG1	200.49	-1.14432	0.383003	-2.98776	0.00281027	0.0614569	8-oxoguanine DNA glycosylase
ENSG00000105894	PTN	427.321	0.970197	0.32486	2.98651	0.00282181	0.0614908	pleiotrophin
ENSG00000118922	KLF12	924.441	0.94859	0.317648	2.98629	0.00282382	0.0614908	KLF transcription factor 12
ENSG00000090013	BLVRB	368.252	1.11962	0.374935	2.98617	0.002825	0.0614908	biliverdin reductase B
ENSG00000081189	MEF2C	194.905	1.31781	0.441367	2.98573	0.00282899	0.0614908	myocyte enhancer factor 2C
ENSG00000150867	PIP4K2A	1346.84	0.783445	0.262535	2.98416	0.00284359	0.0617146	phosphatidylinositol-5-phosphate 4-kinase type 2 alpha
ENSG00000131871	SELENOS	669.783	-0.932881	0.312803	-2.98233	0.00286065	0.0619908	selenoprotein S
ENSG00000139746	RBM26	2570.45	0.778719	0.26117	2.98166	0.00286695	0.0620334	RNA binding motif protein 26
ENSG00000079150	FKBP7	372.995	1.00007	0.335499	2.98085	0.00287446	0.0621023	FKBP prolyl isomerase 7
ENSG00000065060	BLTP3A	927.264	-0.809649	0.272017	-2.97646	0.00291593	0.0629034	bridge-like lipid transfer protein family member 3A
ENSG00000050165	DKK3	79.3759	1.75423	0.58958	2.97539	0.00292618	0.0630295	dickkopf WNT signaling pathway inhibitor 3
ENSG00000112659	CUL9	670.727	-1.03901	0.349278	-2.97474	0.00293235	0.0630675	cullin 9
ENSG00000137200	CMTR1	1811.07	-0.752621	0.253303	-2.97123	0.00296614	0.0636682	cap methyltransferase 1
NA	NA	8.748	6.25625	2.10583	2.97091	0.00296917	0.0636682	NA
ENSG00000183826	BTBD9	385.42	-0.935371	0.315202	-2.96753	0.00300206	0.0642772	BTB domain containing 9
ENSG00000162981	LRATD1	61.5475	1.87316	0.631467	2.96635	0.00301352	0.0644265	LRAT domain containing 1
ENSG00000213995	NAXD	559.986	0.862696	0.290979	2.9648	0.00302878	0.0645754	NAD(P)HX dehydratase
ENSG00000133030	MPRIP	10314.7	0.717969	0.24217	2.96473	0.00302951	0.0645754	myosin phosphatase Rho interacting protein
ENSG00000162616	DNAJB4	576.306	0.966571	0.326155	2.96353	0.00304133	0.0646666	DnaJ heat shock protein family (Hsp40) member B4
ENSG00000171914	TLN2	618.115	-0.891503	0.30084	-2.96338	0.00304281	0.0646666	talin 2
ENSG00000127616	SMARCA4	4021.84	-0.766673	0.258781	-2.96263	0.00305023	0.0647282	SWI/SNF related	matrix associated	actin dependent regulator of chromatin	subfamily a	member 4
ENSG00000225921	NOL7	2857.82	-0.791181	0.267378	-2.95903	0.00308604	0.0653295	nucleolar protein 7
ENSG00000125657	TNFSF9	42.0517	-2.14854	0.726134	-2.95887	0.00308769	0.0653295	TNF superfamily member 9
ENSG00000155099	PIP4P2	338.824	1.0081	0.340803	2.95801	0.00309634	0.0654159	phosphatidylinositol-4	5-bisphosphate 4-phosphatase 2
ENSG00000127863	TNFRSF19	176.218	1.6723	0.565554	2.95692	0.00310732	0.0655168	TNF receptor superfamily member 19
ENSG00000167508	MVD	572.235	0.897412	0.303526	2.95662	0.00311026	0.0655168	mevalonate diphosphate decarboxylase
ENSG00000111261	MANSC1	23.955	-3.15346	1.06736	-2.95445	0.00313232	0.0658844	MANSC domain containing 1
ENSG00000081923	ATP8B1	780.343	-0.84344	0.285528	-2.95397	0.00313717	0.0658898	ATPase phospholipid transporting 8B1
ENSG00000132256	TRIM5	347.077	1.06237	0.359959	2.95135	0.0031639	0.0663538	tripartite motif containing 5
ENSG00000072195	SPEG	377.78	1.35099	0.45842	2.94706	0.00320808	0.0671822	striated muscle enriched protein kinase
ENSG00000163430	FSTL1	4959.98	0.723348	0.245564	2.94566	0.00322264	0.0673885	follistatin like 1
ENSG00000114573	ATP6V1A	1171.44	0.77862	0.264823	2.94016	0.00328047	0.0684978	ATPase H+ transporting V1 subunit A
ENSG00000164050	PLXNB1	26.1047	-2.97408	1.01206	-2.93863	0.0032967	0.0686827	plexin B1
ENSG00000131373	HACL1	140.045	-1.31009	0.44585	-2.93842	0.00329892	0.0686827	2-hydroxyacyl-CoA lyase 1
ENSG00000073849	ST6GAL1	85.5224	-2.08964	0.711459	-2.93712	0.00331281	0.0688719	ST6 beta-galactoside alpha-2	6-sialyltransferase 1
ENSG00000139793	MBNL2	939.398	1.06943	0.364173	2.9366	0.00331835	0.0688871	muscleblind like splicing regulator 2
ENSG00000144306	SCRN3	507.143	0.875778	0.298364	2.93527	0.0033326	0.0690827	secernin 3
ENSG00000183098	GPC6	648.635	0.866678	0.295415	2.93376	0.00334879	0.0693181	glypican 6
ENSG00000162687	KCNT2	21.7281	3.51916	1.20128	2.92952	0.00339488	0.0701707	potassium sodium-activated channel subfamily T member 2
ENSG00000127585	FBXL16	39.4119	2.34849	0.801819	2.92895	0.00340106	0.0701971	F-box and leucine rich repeat protein 16
ENSG00000151287	TEX30	604.79	0.919785	0.314563	2.92401	0.00345553	0.0711237	testis expressed 30
ENSG00000131196	NFATC1	49.9667	2.04826	0.700504	2.92398	0.00345588	0.0711237	nuclear factor of activated T cells 1
ENSG00000173226	IQCB1	321.567	0.99408	0.340348	2.92078	0.00349158	0.0717553	IQ motif containing B1
ENSG00000205683	DPF3	239.305	1.13936	0.390215	2.91984	0.00350212	0.0718688	double PHD fingers 3
ENSG00000133119	RFC3	1588.93	0.813957	0.279029	2.9171	0.003533	0.0723987	replication factor C subunit 3
ENSG00000243811	APOBEC3D	53.3614	2.05001	0.702923	2.9164	0.00354092	0.0724574	apolipoprotein B mRNA editing enzyme catalytic subunit 3D
ENSG00000167775	CD320	1477.87	-0.795774	0.273186	-2.91294	0.00358042	0.0731612	CD320 molecule
ENSG00000156110	ADK	2847.15	0.720042	0.247235	2.91238	0.00358691	0.0731893	adenosine kinase
ENSG00000137218	FRS3	107.272	-1.52465	0.524063	-2.90928	0.00362257	0.0738117	fibroblast growth factor receptor substrate 3
ENSG00000156253	RWDD2B	425.64	0.903115	0.310802	2.90575	0.0036637	0.0745438	RWD domain containing 2B
ENSG00000163513	TGFBR2	2434.62	-0.854455	0.29425	-2.90384	0.00368621	0.0748954	transforming growth factor beta receptor 2
ENSG00000134548	SPX	8.35037	6.18914	2.13194	2.90305	0.00369543	0.0749764	spexin hormone
ENSG00000146674	IGFBP3	1412.89	-0.729513	0.251621	-2.89925	0.00374057	0.0757849	insulin like growth factor binding protein 3
ENSG00000164684	ZNF704	180.973	-1.27658	0.440528	-2.89783	0.00375749	0.0760201	zinc finger protein 704
ENSG00000064547	LPAR2	40.5865	-2.18573	0.755016	-2.89495	0.00379219	0.0764335	lysophosphatidic acid receptor 2
ENSG00000073969	NSF	34.7762	-3.19714	1.10439	-2.89494	0.00379235	0.0764335	N-ethylmaleimide sensitive factor	vesicle fusing ATPase
ENSG00000186193	SAPCD2	970.554	-0.898669	0.310442	-2.89481	0.00379393	0.0764335	suppressor APC domain containing 2
ENSG00000137166	FOXP4	1189.74	-0.754925	0.260856	-2.89403	0.00380328	0.0765144	forkhead box P4
ENSG00000179046	TRIML2	40.0711	-2.66104	0.919846	-2.89292	0.00381681	0.0765738	tripartite motif family like 2
ENSG00000111052	LIN7A	13.9538	4.65583	1.6094	2.89291	0.00381693	0.0765738	lin-7 homolog A	crumbs cell polarity complex component
ENSG00000153094	BCL2L11	171.168	-1.18701	0.410774	-2.88969	0.00385623	0.0772541	BCL2 like 11
ENSG00000141574	SECTM1	222.082	1.12202	0.388958	2.88469	0.00391803	0.0783825	secreted and transmembrane 1
ENSG00000065150	IPO5	11059.2	0.709288	0.245938	2.88401	0.00392648	0.0784419	importin 5
ENSG00000185477	GPRIN3	14.2569	4.69183	1.62889	2.88039	0.00397189	0.0792386	GPRIN family member 3
ENSG00000078018	MAP2	79.655	1.83879	0.638733	2.87881	0.00399176	0.0795243	microtubule associated protein 2
ENSG00000139684	ESD	1583.18	0.704426	0.244734	2.87834	0.00399779	0.0795338	esterase D
ENSG00000140497	SCAMP2	908.158	-0.757787	0.263473	-2.87614	0.00402565	0.0798526	secretory carrier membrane protein 2
ENSG00000010256	UQCRC1	1671.77	-0.733236	0.254952	-2.87598	0.00402773	0.0798526	ubiquinol-cytochrome c reductase core protein 1
ENSG00000143442	POGZ	1164.89	-0.727584	0.253006	-2.87576	0.00403054	0.0798526	pogo transposable element derived with ZNF domain
ENSG00000149269	PAK1	682.687	0.810721	0.281989	2.87501	0.00404021	0.0799336	p21 (RAC1) activated kinase 1
ENSG00000024048	UBR2	1387.65	-0.857164	0.298201	-2.87445	0.00404731	0.0799636	ubiquitin protein ligase E3 component n-recognin 2
ENSG00000137216	TMEM63B	720.648	-0.832887	0.289823	-2.87378	0.0040559	0.0800231	transmembrane protein 63B
ENSG00000163635	ATXN7	649.779	-0.798605	0.278002	-2.87266	0.00407029	0.0801966	ataxin 7
ENSG00000171453	POLR1C	742.871	-0.999271	0.347923	-2.8721	0.00407751	0.0802284	RNA polymerase I and III subunit C
ENSG00000215252	GOLGA8B	318.038	-1.1322	0.394287	-2.87151	0.0040851	0.0802675	golgin A8 family member B
ENSG00000137807	KIF23	3480.13	-0.81965	0.285604	-2.86988	0.00410627	0.0805264	kinesin family member 23
NA	LINC02627	22.2317	3.3562	1.16956	2.86963	0.00410952	0.0805264	long intergenic non-protein coding RNA 2627
ENSG00000142453	CARM1	1559.13	-0.757756	0.264194	-2.86818	0.00412845	0.0807867	coactivator associated arginine methyltransferase 1
ENSG00000140553	UNC45A	1444.97	-0.780589	0.2722	-2.86771	0.00413461	0.0807951	unc-45 myosin chaperone A
ENSG00000156639	ZFAND3	2738.21	-0.703827	0.245468	-2.86728	0.00414016	0.0807951	zinc finger AN1-type containing 3
ENSG00000112759	SLC29A1	2605.2	-0.687013	0.239837	-2.8645	0.00417673	0.081398	solute carrier family 29 member 1 (Augustine blood group)
ENSG00000164128	NPY1R	26.1346	2.75566	0.962315	2.86357	0.00418893	0.0815248	neuropeptide Y receptor Y1
ENSG00000124571	XPO5	2895.12	-0.863994	0.301932	-2.86155	0.00421571	0.0819347	exportin 5
ENSG00000159352	PSMD4	2170.6	-0.714917	0.250619	-2.85261	0.00433617	0.0841496	proteasome 26S subunit ubiquitin receptor	non-ATPase 4
ENSG00000180900	SCRIB	268.07	-1.40505	0.492693	-2.85179	0.00434743	0.0841496	scribble planar cell polarity protein
ENSG00000134371	CDC73	1630.22	0.716533	0.251269	2.85166	0.00434923	0.0841496	cell division cycle 73
ENSG00000066248	NGEF	310.683	1.23293	0.432426	2.8512	0.00435545	0.0841496	neuronal guanine nucleotide exchange factor
ENSG00000103018	CYB5B	1923.55	0.738384	0.258997	2.85094	0.00435905	0.0841496	cytochrome b5 type B
ENSG00000114767	RRP9	583.724	-1.00249	0.352224	-2.84616	0.00442497	0.0853073	ribosomal RNA processing 9	U3 small nucleolar RNA binding protein
ENSG00000088451	TGDS	369.499	0.9054	0.318325	2.84426	0.00445149	0.0857031	TDP-glucose 4	6-dehydratase
ENSG00000005812	FBXL3	1174.68	0.745991	0.262465	2.84225	0.00447968	0.086113	F-box and leucine rich repeat protein 3
ENSG00000052802	MSMO1	639.673	0.806015	0.28362	2.84188	0.0044848	0.086113	methylsterol monooxygenase 1
ENSG00000106991	ENG	73.1187	1.97374	0.694668	2.84127	0.00449337	0.086162	endoglin
ENSG00000142798	HSPG2	1441.52	0.956159	0.336647	2.84024	0.0045079	0.0863251	heparan sulfate proteoglycan 2
ENSG00000198130	HIBCH	476.517	0.85936	0.302831	2.83776	0.0045432	0.0868147	3-hydroxyisobutyryl-CoA hydrolase
ENSG00000251209	LINC00923	6.59994	-6.49788	2.28993	-2.83759	0.00454559	0.0868147	long intergenic non-protein coding RNA 923
ENSG00000154328	NEIL2	372.956	0.933066	0.328988	2.83617	0.00456583	0.0870446	nei like DNA glycosylase 2
ENSG00000186462	NAP1L2	6.59801	-6.4934	2.28972	-2.83589	0.00456978	0.0870446	nucleosome assembly protein 1 like 2
ENSG00000167281	RBFOX3	20.5824	3.43718	1.21343	2.83262	0.00461679	0.0878232	RNA binding fox-1 homolog 3
ENSG00000146281	PM20D2	1730.33	-0.709874	0.250644	-2.83219	0.00462297	0.0878242	peptidase M20 domain containing 2
ENSG00000196154	S100A4	809.31	1.08965	0.384966	2.83052	0.00464723	0.088168	S100 calcium binding protein A4
ENSG00000151470	C4orf33	186.745	1.21749	0.430469	2.82829	0.00467974	0.0886675	chromosome 4 open reading frame 33
ENSG00000099864	PALM	84.9975	1.62525	0.574871	2.82716	0.00469634	0.0888342	paralemmin
ENSG00000140391	TSPAN3	2213.49	-0.705728	0.249652	-2.82684	0.00470094	0.0888342	tetraspanin 3
ENSG00000167074	TEF	133.216	1.40446	0.497132	2.82512	0.00472633	0.0890835	TEF transcription factor	PAR bZIP family member
ENSG00000145041	DCAF1	1017.98	-0.8141	0.288181	-2.82496	0.00472864	0.0890835	DDB1 and CUL4 associated factor 1
ENSG00000179583	CIITA	40.0087	-2.42859	0.859775	-2.82468	0.0047328	0.0890835	class II major histocompatibility complex transactivator
ENSG00000088280	ASAP3	358.622	1.27029	0.449888	2.82358	0.00474911	0.0891231	ArfGAP with SH3 domain	ankyrin repeat and PH domain 3
ENSG00000070047	PHRF1	41.6419	-3.09429	1.09593	-2.82345	0.00475099	0.0891231	PHD and ring finger domains 1
ENSG00000086696	HSD17B2	14.4399	-4.07825	1.44451	-2.82328	0.00475356	0.0891231	hydroxysteroid 17-beta dehydrogenase 2
ENSG00000196358	NTNG2	31.6237	-2.66468	0.944149	-2.82231	0.00476796	0.0892762	netrin G2
ENSG00000114902	SPCS1	923.591	-0.739121	0.26198	-2.82129	0.00478306	0.089442	signal peptidase complex subunit 1
ENSG00000093183	SEC22C	1006.6	-0.743069	0.263473	-2.82028	0.00479814	0.089607	SEC22 homolog C	vesicle trafficking protein
ENSG00000154229	PRKCA	4225.47	0.687236	0.243901	2.81768	0.00483714	0.0902177	protein kinase C alpha
ENSG00000204019	CT83	6.59416	-6.4845	2.30175	-2.8172	0.00484442	0.0902361	cancer/testis antigen 83
ENSG00000067225	PKM	39342.5	-0.636351	0.225934	-2.81653	0.00485453	0.0902583	pyruvate kinase M1/2
ENSG00000185896	LAMP1	3938.66	0.646985	0.22973	2.81629	0.00485822	0.0902583	lysosomal associated membrane protein 1
ENSG00000188846	RPL14	11242.2	-0.69253	0.245984	-2.81535	0.00487248	0.0903635	ribosomal protein L14
ENSG00000187068	C3orf70	13.9769	-3.70586	1.31643	-2.81508	0.0048765	0.0903635	chromosome 3 open reading frame 70
ENSG00000123453	SARDH	206.666	1.38595	0.492613	2.81347	0.00490101	0.0906349	sarcosine dehydrogenase
ENSG00000248890	HHIP-AS1	59.6904	-1.73926	0.618231	-2.81329	0.0049038	0.0906349	HHIP antisense RNA 1
ENSG00000205835	GMNC	8.01351	6.12932	2.18354	2.80705	0.00499971	0.0922661	geminin coiled-coil domain containing
ENSG00000157557	ETS2	542.004	-0.926401	0.330066	-2.80672	0.00500494	0.0922661	ETS proto-oncogene 2	transcription factor
ENSG00000114698	PLSCR4	218.832	1.17141	0.417524	2.80562	0.00502193	0.0924603	phospholipid scramblase 4
ENSG00000103034	NDRG4	61.7689	1.81978	0.649201	2.80311	0.0050612	0.0930554	NDRG family member 4
ENSG00000116120	FARSB	2246.33	0.849178	0.302983	2.80273	0.00506725	0.0930554	phenylalanyl-tRNA synthetase subunit beta
ENSG00000211445	GPX3	813.467	0.818746	0.292214	2.80188	0.00508065	0.0931821	glutathione peroxidase 3
ENSG00000102401	ARMCX3	776.688	0.854299	0.305042	2.80059	0.00510085	0.093433	armadillo repeat containing X-linked 3
ENSG00000025434	NR1H3	162.355	1.40163	0.500626	2.79976	0.00511401	0.0935545	nuclear receptor subfamily 1 group H member 3
ENSG00000165757	JCAD	11.8465	-4.87943	1.74385	-2.79808	0.0051407	0.0939227	junctional cadherin 5 associated
ENSG00000242732	RTL5	26.2001	-2.57785	0.922769	-2.7936	0.00521253	0.0950798	retrotransposon Gag like 5
ENSG00000105518	TMEM205	533.535	-0.833288	0.298316	-2.7933	0.00521731	0.0950798	transmembrane protein 205
ENSG00000075618	FSCN1	1562.61	0.687757	0.246556	2.78946	0.00527964	0.0960787	fascin actin-bundling protein 1
ENSG00000185219	ZNF445	530.671	-0.818077	0.293313	-2.7891	0.00528553	0.0960787	zinc finger protein 445
ENSG00000173267	SNCG	34.9929	2.42431	0.86939	2.78851	0.00529503	0.0961293	synuclein gamma
ENSG00000167114	SLC27A4	697.413	-0.811205	0.291195	-2.78578	0.00533987	0.0968206	solute carrier family 27 member 4
ENSG00000076201	PTPN23	1112.27	-0.809613	0.290687	-2.78517	0.00534991	0.0968801	protein tyrosine phosphatase non-receptor type 23
ENSG00000173559	NABP1	1380.71	0.694829	0.249854	2.78094	0.00542011	0.0980274	nucleic acid binding protein 1
ENSG00000167005	NUDT21	5308.25	0.651666	0.234463	2.7794	0.00544599	0.0982645	nudix hydrolase 21
ENSG00000124641	MED20	920.532	-0.795892	0.286378	-2.77916	0.0054499	0.0982645	mediator complex subunit 20
ENSG00000069431	ABCC9	96.3683	1.53851	0.553635	2.77893	0.0054538	0.0982645	ATP binding cassette subfamily C member 9
ENSG00000125249	RAP2A	1206.9	0.704175	0.253481	2.77802	0.0054691	0.0984163	RAP2A	member of RAS oncogene family
ENSG00000158458	NRG2	17.5197	3.68922	1.32849	2.77701	0.00548621	0.0986003	neuregulin 2
ENSG00000136869	TLR4	276.118	-1.08701	0.391952	-2.77333	0.00554866	0.0995977	toll like receptor 4
ENSG00000112079	STK38	2902.1	-0.646723	0.233584	-2.7687	0.00562807	0.100897	serine/threonine kinase 38
ENSG00000177675	CD163L1	212.404	1.0734	0.387988	2.76657	0.00566491	0.10143	CD163 molecule like 1
ENSG00000167363	FN3K	75.9589	1.5572	0.563285	2.76449	0.00570112	0.101937	fructosamine 3 kinase
ENSG00000093167	LRRFIP2	946.668	-0.790207	0.285879	-2.76413	0.00570747	0.101937	LRR binding FLII interacting protein 2
ENSG00000164081	TEX264	445.231	-0.881214	0.31927	-2.76009	0.00577861	0.103079	testis expressed 264	ER-phagy receptor
ENSG00000159212	CLIC6	51.7586	-1.83956	0.666879	-2.75847	0.00580728	0.103462	chloride intracellular channel 6
ENSG00000124562	SNRPC	2699.16	-0.668614	0.242538	-2.75674	0.00583799	0.10388	small nuclear ribonucleoprotein polypeptide C
ENSG00000029993	HMGB3	2241.39	-0.780587	0.28324	-2.75592	0.00585276	0.104014	high mobility group box 3
ENSG00000074696	HACD3	2427.07	-0.654851	0.237672	-2.75527	0.0058644	0.104091	3-hydroxyacyl-CoA dehydratase 3
ENSG00000124541	RRP36	1711.76	-0.857546	0.311628	-2.75183	0.0059264	0.104994	ribosomal RNA processing 36
ENSG00000129351	ILF3	10390	-0.733925	0.266724	-2.75163	0.00592992	0.104994	interleukin enhancer binding factor 3
ENSG00000163378	EOGT	353.877	-0.953108	0.346539	-2.75036	0.00595299	0.105272	EGF domain specific O-linked N-acetylglucosamine transferase
ENSG00000112242	E2F3	1347.07	-0.818623	0.297817	-2.74874	0.00598246	0.105663	E2F transcription factor 3
ENSG00000149571	KIRREL3	354.018	-1.07048	0.389522	-2.7482	0.00599238	0.105708	kirre like nephrin family adhesion molecule 3
ENSG00000181035	SLC25A42	116.308	1.59397	0.580294	2.74684	0.00601724	0.106016	solute carrier family 25 member 42
ENSG00000147044	CASK	468.13	-0.887746	0.323254	-2.74628	0.00602748	0.106034	calcium/calmodulin dependent serine protein kinase
ENSG00000165661	QSOX2	1086.93	-0.725617	0.264247	-2.74598	0.00603309	0.106034	quiescin sulfhydryl oxidase 2
ENSG00000112739	PRPF4B	4108.98	-0.653924	0.238257	-2.74461	0.00605821	0.106225	pre-mRNA processing factor 4B
ENSG00000180543	TSPYL5	286.686	1.00149	0.364977	2.74399	0.00606979	0.106225	TSPY like 5
ENSG00000145990	GFOD1	260.845	-1.01377	0.369474	-2.74382	0.00607283	0.106225	glucose-fructose oxidoreductase domain containing 1
ENSG00000266412	NCOA4	3528.26	0.664007	0.242005	2.74378	0.00607362	0.106225	nuclear receptor coactivator 4
ENSG00000120690	ELF1	786.829	0.73984	0.269767	2.74252	0.006097	0.106504	E74 like ETS transcription factor 1
ENSG00000154723	ATP5PF	712.462	-0.757315	0.276552	-2.73842	0.00617359	0.107711	ATP synthase peripheral stalk subunit F6
ENSG00000163539	CLASP2	1169.97	-0.763746	0.278943	-2.738	0.00618141	0.107716	cytoplasmic linker associated protein 2
ENSG00000173227	SYT12	52.2302	-2.14486	0.783983	-2.73585	0.00622191	0.10829	synaptotagmin 12
ENSG00000176124	DLEU1	388.038	0.86614	0.31668	2.73506	0.00623683	0.108361	deleted in lymphocytic leukemia 1
ENSG00000135709	KIAA0513	179.985	1.08771	0.397724	2.73484	0.00624111	0.108361	KIAA0513
ENSG00000173621	LRFN4	423.227	-1.00228	0.366809	-2.73244	0.00628676	0.109014	leucine rich repeat and fibronectin type III domain containing 4
ENSG00000155330	C16orf87	190.965	1.0666	0.390401	2.73206	0.00629397	0.109014	chromosome 16 open reading frame 87
ENSG00000134897	BIVM	372.607	1.06542	0.39048	2.72848	0.0063627	0.109963	basic	immunoglobulin-like variable motif containing
ENSG00000145287	PLAC8	1998.1	0.658561	0.241372	2.72841	0.00636409	0.109963	placenta associated 8
ENSG00000079805	DNM2	3217.85	-0.673275	0.246919	-2.7267	0.00639711	0.1104	dynamin 2
ENSG00000111679	PTPN6	22.3802	-2.83152	1.03936	-2.72429	0.00644393	0.111075	protein tyrosine phosphatase non-receptor type 6
ENSG00000071051	NCK2	187.131	-1.08894	0.399803	-2.72369	0.00645562	0.111079	NCK adaptor protein 2
ENSG00000105559	PLEKHA4	275.141	0.984951	0.361666	2.72337	0.00646198	0.111079	pleckstrin homology domain containing A4
ENSG00000185973	TMLHE	66.0573	-1.77374	0.651372	-2.72309	0.00646745	0.111079	trimethyllysine hydroxylase	epsilon
ENSG00000170848	PSG6	50.2821	1.99576	0.733218	2.72191	0.00649049	0.111341	pregnancy specific beta-1-glycoprotein 6
ENSG00000233997	LINC01425	6.16483	-6.40997	2.35959	-2.71656	0.00659647	0.113024	long intergenic non-protein coding RNA 1425
ENSG00000060971	ACAA1	356.718	-0.925786	0.341097	-2.71414	0.00664482	0.113716	acetyl-CoA acyltransferase 1
ENSG00000154639	CXADR	235.751	-1.311	0.483186	-2.71323	0.00666301	0.113891	CXADR Ig-like cell adhesion molecule
ENSG00000117362	APH1A	1442.28	-0.697408	0.257481	-2.70858	0.0067572	0.115364	aph-1 homolog A	gamma-secretase subunit
ENSG00000104783	KCNN4	697.877	0.949886	0.350818	2.70763	0.0067766	0.115557	potassium calcium-activated channel subfamily N member 4
ENSG00000173253	DMRT2	6.15326	-6.38186	2.35848	-2.70592	0.00681163	0.116016	doublesex and mab-3 related transcription factor 2
ENSG00000173218	VANGL1	920.68	-0.733178	0.271033	-2.70512	0.0068279	0.116155	VANGL planar cell polarity protein 1
ENSG00000107798	LIPA	1334.98	0.738486	0.273119	2.7039	0.00685303	0.116445	lipase A	lysosomal acid type
ENSG00000171105	INSR	249.596	-1.24882	0.462217	-2.7018	0.0068966	0.117046	insulin receptor
ENSG00000158234	FAIM	186.317	1.0868	0.402725	2.69861	0.00696289	0.118031	Fas apoptotic inhibitory molecule
ENSG00000137700	SLC37A4	886.588	-0.732099	0.271509	-2.69641	0.00700908	0.118674	solute carrier family 37 member 4
ENSG00000185352	HS6ST3	106.807	1.46644	0.54401	2.69561	0.00702606	0.118821	heparan sulfate 6-O-sulfotransferase 3
ENSG00000253368	TRNP1	464.388	0.825559	0.306316	2.69512	0.0070363	0.118854	TMF1 regulated nuclear protein 1
ENSG00000172819	RARG	369.051	0.926181	0.343837	2.69366	0.00706725	0.118917	retinoic acid receptor gamma
ENSG00000163812	ZDHHC3	1250.81	-0.682015	0.253222	-2.69335	0.00707379	0.118917	zinc finger DHHC-type palmitoyltransferase 3
ENSG00000113448	PDE4D	661.66	-0.881054	0.327164	-2.69301	0.00708108	0.118917	phosphodiesterase 4D
ENSG00000166557	TMED3	728.084	-0.789543	0.293211	-2.69274	0.00708666	0.118917	transmembrane p24 trafficking protein 3
ENSG00000104643	MTMR9	330.714	0.923851	0.343097	2.69268	0.00708797	0.118917	myotubularin related protein 9
ENSG00000096401	CDC5L	3386.72	-0.692146	0.257055	-2.69259	0.00708985	0.118917	cell division cycle 5 like
ENSG00000164733	CTSB	6246.05	0.618063	0.229701	2.69073	0.00712959	0.119444	cathepsin B
ENSG00000041353	RAB27B	854.065	0.940551	0.349673	2.6898	0.00714942	0.119635	RAB27B	member RAS oncogene family
ENSG00000112419	PHACTR2	786.823	-0.746338	0.277509	-2.68942	0.00715769	0.119635	phosphatase and actin regulator 2
ENSG00000023608	SNAPC1	4965.99	0.674509	0.25096	2.68771	0.00719431	0.120106	small nuclear RNA activating complex polypeptide 1
ENSG00000144895	EIF2A	2772.39	0.671101	0.249751	2.68708	0.00720798	0.120195	eukaryotic translation initiation factor 2A
ENSG00000156711	MAPK13	979.047	0.885783	0.329728	2.6864	0.00722258	0.120298	mitogen-activated protein kinase 13
ENSG00000103351	CLUAP1	247.756	0.967845	0.360479	2.68489	0.00725536	0.120704	clusterin associated protein 1
ENSG00000085982	USP40	1076.67	0.690091	0.257107	2.68406	0.00727338	0.120863	ubiquitin specific peptidase 40
ENSG00000166669	ATF7IP2	5.94052	-6.34736	2.3653	-2.68353	0.00728488	0.120914	activating transcription factor 7 interacting protein 2
ENSG00000173930	SLCO4C1	49.6395	1.84733	0.688587	2.68278	0.00730125	0.121045	solute carrier organic anion transporter family member 4C1
NA	ZBED10P	7.17096	5.96935	2.22573	2.68198	0.00731877	0.121195	zinc finger BED-type containing 10	pseudogene
ENSG00000136231	IGF2BP3	1253.92	0.866283	0.323193	2.68039	0.00735362	0.121632	insulin like growth factor 2 mRNA binding protein 3
ENSG00000109756	RAPGEF2	692.498	-0.738444	0.275743	-2.67802	0.0074059	0.122355	Rap guanine nucleotide exchange factor 2
ENSG00000147255	IGSF1	51.1749	2.15492	0.804926	2.67716	0.00742488	0.122389	immunoglobulin superfamily member 1
ENSG00000069482	GAL	5.93667	-6.3374	2.36721	-2.67716	0.00742501	0.122389	galanin and GMAP prepropeptide
ENSG00000176087	SLC35A4	979.394	-0.720543	0.269224	-2.67637	0.00744247	0.122536	solute carrier family 35 member A4
ENSG00000155304	HSPA13	1499.62	-0.657281	0.24564	-2.67579	0.00745526	0.122605	heat shock protein family A (Hsp70) member 13
ENSG00000054983	GALC	1063.77	-0.725965	0.271498	-2.67393	0.00749689	0.123148	galactosylceramidase
ENSG00000161999	JMJD8	148.949	-1.21172	0.453251	-2.6734	0.00750856	0.123199	jumonji domain containing 8
ENSG00000134243	SORT1	2293.34	-0.657661	0.246147	-2.67182	0.00754402	0.123443	sortilin 1
ENSG00000188404	SELL	7.19798	5.97457	2.23618	2.67178	0.007545	0.123443	selectin L
ENSG00000132950	ZMYM5	270.17	0.948212	0.354924	2.67159	0.00754929	0.123443	zinc finger MYM-type containing 5
ENSG00000145996	CDKAL1	560.969	-0.827993	0.310118	-2.66993	0.00758666	0.123913	CDK5 regulatory subunit associated protein 1 like 1
ENSG00000131379	C3orf20	11.1523	-4.7503	1.77982	-2.66898	0.00760831	0.124125	chromosome 3 open reading frame 20
ENSG00000100092	SH3BP1	98.6359	1.58233	0.593131	2.66776	0.00763598	0.124434	SH3 domain binding protein 1
ENSG00000107438	PDLIM1	1163.77	0.7051	0.26443	2.66649	0.00766476	0.124761	PDZ and LIM domain 1
ENSG00000114270	COL7A1	176.612	1.66936	0.626321	2.66534	0.00769113	0.125049	collagen type VII alpha 1 chain
ENSG00000060762	MPC1	366.652	-0.848708	0.31853	-2.66445	0.00771138	0.125213	mitochondrial pyruvate carrier 1
ENSG00000265241	RBM8A	3145.36	-0.650397	0.244155	-2.66387	0.00772468	0.125213	RNA binding motif protein 8A
ENSG00000147364	FBXO25	157.557	1.16909	0.438889	2.66375	0.00772749	0.125213	F-box protein 25
ENSG00000198648	STK39	941.714	-0.770972	0.289556	-2.6626	0.0077539	0.125499	serine/threonine kinase 39
ENSG00000203875	SNHG5	4564.14	0.64713	0.243163	2.66131	0.00778382	0.125841	small nucleolar RNA host gene 5
ENSG00000134905	CARS2	1032.15	0.763893	0.287143	2.66032	0.00780665	0.126068	cysteinyl-tRNA synthetase 2	mitochondrial
ENSG00000134146	DPH6	116.937	1.2497	0.469948	2.65922	0.00783218	0.126338	diphthamine biosynthesis 6
ENSG00000153363	LINC00467	240.429	0.97542	0.366907	2.6585	0.00784903	0.126467	long intergenic non-protein coding RNA 467
ENSG00000124098	FAM210B	654.238	0.878152	0.330582	2.65638	0.00789843	0.12712	family with sequence similarity 210 member B
ENSG00000214706	IFRD2	1085.29	-0.896421	0.337579	-2.65544	0.00792056	0.127333	interferon related developmental regulator 2
ENSG00000109089	CDR2L	777.801	0.820112	0.309168	2.65265	0.00798636	0.128247	cerebellar degeneration related protein 2 like
ENSG00000145945	FAM50B	23.5998	-2.68518	1.01313	-2.65038	0.00804007	0.128884	family with sequence similarity 50 member B
ENSG00000132640	BTBD3	1052.58	-0.724793	0.273484	-2.65022	0.00804403	0.128884	BTB domain containing 3
ENSG00000003096	KLHL13	15.9523	-3.61195	1.36334	-2.64934	0.00806497	0.128926	kelch like family member 13
ENSG00000178761	FAM219B	497.775	-0.854748	0.322646	-2.64918	0.00806874	0.128926	family with sequence similarity 219 member B
ENSG00000165609	NUDT5	1710.92	0.691039	0.26087	2.64897	0.00807365	0.128926	nudix hydrolase 5
ENSG00000198862	LTN1	1077.41	0.697493	0.263357	2.64847	0.00808571	0.128975	listerin E3 ubiquitin protein ligase 1
ENSG00000167377	ZNF23	586.311	0.769678	0.290735	2.64736	0.00811241	0.129257	zinc finger protein 23
ENSG00000143376	SNX27	635.809	-0.768989	0.290578	-2.64641	0.00813513	0.129475	sorting nexin 27
ENSG00000166582	CENPV	284.893	-1.05984	0.400796	-2.64433	0.0081853	0.129754	centromere protein V
ENSG00000121931	LRIF1	741.797	0.815901	0.308556	2.64425	0.00818717	0.129754	ligand dependent nuclear receptor interacting factor 1
ENSG00000104064	GABPB1	732.9	0.814145	0.307933	2.6439	0.00819563	0.129754	GA binding protein transcription factor subunit beta 1
ENSG00000224184	MIR3681HG	23.6967	3.13412	1.18545	2.64382	0.0081977	0.129754	MIR3681 host gene
ENSG00000182272	B4GALNT4	111.794	1.56223	0.590968	2.64352	0.00820496	0.129754	beta-1	4-N-acetyl-galactosaminyltransferase 4
NA	EMC3-AS1	87.9564	-1.44909	0.548242	-2.64316	0.00821355	0.129754	EMC3 antisense RNA 1
ENSG00000185551	NR2F2	5239.98	-0.762734	0.28858	-2.64306	0.00821609	0.129754	nuclear receptor subfamily 2 group F member 2
ENSG00000133138	TBC1D8B	130.945	1.45221	0.549555	2.64252	0.00822913	0.129817	TBC1 domain family member 8B
ENSG00000156642	NPTN	1826.33	-0.636146	0.240768	-2.64215	0.0082382	0.129817	neuroplastin
ENSG00000250548	LINC01303	53.6994	1.90345	0.720971	2.64012	0.00828762	0.130453	long intergenic non-protein coding RNA 1303
ENSG00000068028	RASSF1	310.798	-0.943543	0.357442	-2.63971	0.00829777	0.130469	Ras association domain family member 1
ENSG00000007264	MATK	6.98903	5.93214	2.24908	2.63759	0.00834982	0.131039	megakaryocyte-associated tyrosine kinase
ENSG00000157500	APPL1	1286.02	-0.67213	0.254844	-2.63742	0.00835386	0.131039	adaptor protein	phosphotyrosine interacting with PH domain and leucine zipper 1
ENSG00000168763	CNNM3	494.956	-0.790944	0.299928	-2.63711	0.00836149	0.131039	cyclin and CBS domain divalent metal cation transport mediator 3
ENSG00000182389	CACNB4	170.443	1.14831	0.435715	2.63545	0.00840255	0.131493	calcium voltage-gated channel auxiliary subunit beta 4
ENSG00000146574	CCZ1B	726.145	-0.746165	0.283153	-2.6352	0.00840882	0.131493	CCZ1 homolog B	vacuolar protein trafficking and biogenesis associated
ENSG00000135736	CCDC102A	172.452	1.08329	0.411328	2.63365	0.00844728	0.131937	coiled-coil domain containing 102A
ENSG00000073008	PVR	1951.59	-0.803304	0.305054	-2.63331	0.00845559	0.131937	PVR cell adhesion molecule
ENSG00000290382	ZNF876P	6.935	5.92138	2.24929	2.63255	0.00847458	0.132057	zinc finger protein 876	pseudogene
ENSG00000134824	FADS2	2627.15	0.631313	0.239845	2.63217	0.00848421	0.132057	fatty acid desaturase 2
ENSG00000267313	KC6	8.77556	-5.43787	2.06614	-2.6319	0.00849098	0.132057	keratoconus gene 6
ENSG00000138430	OLA1	4429.07	0.63088	0.23981	2.63075	0.00851966	0.13236	Obg like ATPase 1
ENSG00000122852	SFTPA1	7.27478	-6.65621	2.5317	-2.62915	0.00855989	0.132841	surfactant protein A1
ENSG00000075391	RASAL2	1077.84	0.691595	0.263145	2.62818	0.00858419	0.133074	RAS protein activator like 2
ENSG00000112541	LINC00473	10.2937	-4.61127	1.75698	-2.62455	0.00867647	0.134359	long intergenic non-protein coding RNA 473
ENSG00000160691	SHC1	2142.33	0.644208	0.24568	2.62215	0.00873782	0.135086	SHC adaptor protein 1
ENSG00000232434	AJM1	38.2721	2.05972	0.785663	2.62164	0.00875084	0.135086	apical junction component 1 homolog
ENSG00000003249	DBNDD1	310.118	0.876486	0.334332	2.6216	0.00875176	0.135086	dysbindin domain containing 1
ENSG00000136002	ARHGEF4	140.927	-1.45032	0.55335	-2.62098	0.00876774	0.135187	Rho guanine nucleotide exchange factor 4
ENSG00000172667	ZMAT3	812.72	0.701455	0.267683	2.62047	0.00878085	0.135244	zinc finger matrin-type 3
ENSG00000185787	MORF4L1	5060.36	-0.613003	0.234048	-2.61913	0.00881538	0.13563	mortality factor 4 like 1
ENSG00000123496	IL13RA2	7.4542	6.0247	2.30137	2.61788	0.00884789	0.135984	interleukin 13 receptor subunit alpha 2
ENSG00000184937	WT1	11.2025	-4.7718	1.82376	-2.61646	0.00888458	0.136321	WT1 transcription factor
ENSG00000172456	FGGY	48.1106	2.30775	0.882065	2.6163	0.00888885	0.136321	FGGY carbohydrate kinase domain containing
ENSG00000081913	PHLPP1	294.367	-0.921255	0.352312	-2.61488	0.00892582	0.136572	PH domain and leucine rich repeat protein phosphatase 1
ENSG00000130177	CDC16	1586.42	0.647107	0.247499	2.61458	0.00893372	0.136572	cell division cycle 16
ENSG00000116128	BCL9	193.383	-1.10179	0.421404	-2.61458	0.00893383	0.136572	BCL9 transcription coactivator
ENSG00000047849	MAP4	6300.13	-0.613783	0.234794	-2.61413	0.00894546	0.136604	microtubule associated protein 4
ENSG00000197372	ZNF675	276.955	1.07732	0.412526	2.61153	0.00901374	0.1375	zinc finger protein 675
ENSG00000101298	SNPH	187.142	1.07578	0.412152	2.61015	0.00905029	0.137911	syntaphilin
ENSG00000010438	PRSS3	365.373	0.911316	0.349215	2.60961	0.0090645	0.137981	serine protease 3
ENSG00000185989	RASA3	1522.29	0.655633	0.251561	2.60626	0.00915382	0.139193	RAS p21 protein activator 3
ENSG00000091129	NRCAM	100.432	1.34852	0.517575	2.60545	0.00917526	0.139371	neuronal cell adhesion molecule
ENSG00000079482	OPHN1	410.976	-0.805464	0.309354	-2.6037	0.00922246	0.139846	oligophrenin 1
ENSG00000184515	BEX5	12.6609	-3.91734	1.50461	-2.60356	0.00922612	0.139846	brain expressed X-linked 5
ENSG00000125378	BMP4	449.109	-0.782151	0.300481	-2.60299	0.00924138	0.139872	bone morphogenetic protein 4
ENSG00000121858	TNFSF10	75.0275	-1.9206	0.737907	-2.60277	0.00924733	0.139872	TNF superfamily member 10
ENSG00000169439	SDC2	491.478	0.823581	0.316763	2.59999	0.00932276	0.140864	syndecan 2
ENSG00000170962	PDGFD	162.302	1.21694	0.468425	2.59794	0.0093784	0.141555	platelet derived growth factor D
ENSG00000178075	GRAMD1C	240.747	0.998216	0.384819	2.59399	0.00948696	0.143043	GRAM domain containing 1C
ENSG00000126709	IFI6	274.338	0.942315	0.363345	2.59345	0.00950192	0.143118	interferon alpha inducible protein 6
ENSG00000197712	FAM114A1	1144.64	0.747076	0.288104	2.59307	0.00951222	0.143123	family with sequence similarity 114 member A1
ENSG00000143401	ANP32E	4657.82	-0.651036	0.251138	-2.59235	0.00953232	0.143275	acidic nuclear phosphoprotein 32 family member E
ENSG00000144802	NFKBIZ	458.518	-0.989763	0.38202	-2.59087	0.00957347	0.143743	NFKB inhibitor zeta
ENSG00000140511	HAPLN3	75.6943	-1.50295	0.580932	-2.58715	0.00967748	0.144952	hyaluronan and proteoglycan link protein 3
ENSG00000139970	RTN1	48.2493	1.80437	0.697449	2.5871	0.00967868	0.144952	reticulon 1
ENSG00000173198	CYSLTR1	11.5612	4.39	1.69701	2.5869	0.00968436	0.144952	cysteinyl leukotriene receptor 1
ENSG00000219435	CATSPERZ	77.2294	1.64836	0.637441	2.58591	0.00971232	0.144987	catsper channel auxiliary subunit zeta
ENSG00000141384	TAF4B	379.74	-0.847652	0.327803	-2.58586	0.00971373	0.144987	TATA-box binding protein associated factor 4b
ENSG00000154719	MRPL39	343.269	-0.855037	0.330674	-2.58574	0.00971707	0.144987	mitochondrial ribosomal protein L39
ENSG00000170323	FABP4	6.80709	5.89395	2.27978	2.58531	0.00972902	0.145014	fatty acid binding protein 4
ENSG00000258839	MC1R	77.9374	1.54294	0.597119	2.58397	0.00976696	0.145428	melanocortin 1 receptor
ENSG00000231290	APCDD1L-DT	83.2607	4.64102	1.7968	2.58293	0.00979639	0.145715	APCDD1L divergent transcript
ENSG00000105855	ITGB8	40.5733	-2.0402	0.789999	-2.58253	0.00980788	0.145734	integrin subunit beta 8
ENSG00000163751	CPA3	20.4626	-2.91725	1.13008	-2.58146	0.00983834	0.146036	carboxypeptidase A3
ENSG00000166446	CDYL2	343.731	0.845855	0.327832	2.58015	0.00987583	0.14644	chromodomain Y like 2
ENSG00000154864	PIEZO2	28.9811	3.06435	1.18839	2.57857	0.00992107	0.146959	piezo type mechanosensitive ion channel component 2
ENSG00000125731	SH2D3A	103.054	-1.42233	0.552585	-2.57396	0.0100541	0.148391	SH2 domain containing 3A
ENSG00000114739	ACVR2B	187.805	-1.08024	0.419682	-2.57395	0.0100546	0.148391	activin A receptor type 2B
ENSG00000108582	CPD	2392.56	-0.728172	0.28294	-2.57359	0.0100649	0.148391	carboxypeptidase D
ENSG00000113851	CRBN	500.01	-0.762756	0.296381	-2.57357	0.0100656	0.148391	cereblon
ENSG00000115966	ATF2	1163.89	0.65388	0.254089	2.57343	0.0100696	0.148391	activating transcription factor 2
ENSG00000100784	RPS6KA5	246.668	-0.999573	0.388821	-2.57078	0.0101469	0.149378	ribosomal protein S6 kinase A5
ENSG00000167680	SEMA6B	341.437	0.944334	0.367418	2.57019	0.0101644	0.149481	semaphorin 6B
ENSG00000171462	DLK2	167.846	-1.07299	0.41758	-2.56953	0.0101836	0.14961	delta like non-canonical Notch ligand 2
ENSG00000137462	TLR2	5.72779	-6.31042	2.45735	-2.56798	0.0102292	0.150127	toll like receptor 2
ENSG00000240747	KRBOX1	119.144	-1.19156	0.464452	-2.56552	0.010302	0.15104	KRAB box domain containing 1
ENSG00000102931	ARL2BP	988.011	0.702958	0.274077	2.56482	0.0103231	0.151194	ADP ribosylation factor like GTPase 2 binding protein
ENSG00000111452	ADGRD1	212.392	0.983648	0.383814	2.56283	0.0103824	0.151908	adhesion G protein-coupled receptor D1
ENSG00000178695	KCTD12	1271.27	0.70428	0.27488	2.56213	0.0104032	0.152056	potassium channel tetramerization domain containing 12
ENSG00000166592	RRAD	13.0957	4.00034	1.56203	2.56099	0.0104374	0.152289	RRAD	Ras related glycolysis inhibitor and calcium channel regulator
ENSG00000034713	GABARAPL2	504.559	0.830407	0.324265	2.56089	0.0104404	0.152289	GABA type A receptor associated protein like 2
ENSG00000180353	HCLS1	43.1705	-1.86117	0.727281	-2.55908	0.0104949	0.152928	hematopoietic cell-specific Lyn substrate 1
NA	CNN3-DT	39.2532	2.07886	0.8132	2.55639	0.0105765	0.15396	CNN3 divergent transcript
ENSG00000011332	DPF1	233.926	0.946894	0.370457	2.55601	0.0105879	0.15397	double PHD fingers 1
ENSG00000134755	DSC2	285.876	0.966298	0.378185	2.55509	0.0106159	0.154042	desmocollin 2
ENSG00000185825	BCAP31	2591.8	-0.631038	0.247008	-2.55473	0.0106271	0.154042	B cell receptor associated protein 31
ENSG00000140945	CDH13	14.67	3.41593	1.33717	2.5546	0.0106309	0.154042	cadherin 13
ENSG00000153786	ZDHHC7	2190.66	0.616771	0.241472	2.55421	0.0106428	0.154042	zinc finger DHHC-type palmitoyltransferase 7
ENSG00000140941	MAP1LC3B	1576.03	0.663546	0.259797	2.55409	0.0106466	0.154042	microtubule associated protein 1 light chain 3 beta
ENSG00000095637	SORBS1	21.2826	-3.14556	1.232	-2.55321	0.0106735	0.154202	sorbin and SH3 domain containing 1
ENSG00000150667	FSIP1	15.6723	3.22886	1.26472	2.55303	0.0106792	0.154202	fibrous sheath interacting protein 1
ENSG00000144908	ALDH1L1	42.0091	2.2335	0.875062	2.55239	0.0106988	0.15433	aldehyde dehydrogenase 1 family member L1
ENSG00000153832	FBXO36	72.0962	1.49461	0.586331	2.54909	0.0108005	0.15564	F-box protein 36
ENSG00000163320	CGGBP1	1761.14	-0.6209	0.243618	-2.54866	0.0108138	0.155675	CGG triplet repeat binding protein 1
ENSG00000144649	GASK1A	14.1482	-3.42835	1.34534	-2.54831	0.0108247	0.155676	golgi associated kinase 1A
ENSG00000038382	TRIO	3330.35	-0.615902	0.241805	-2.5471	0.0108622	0.156058	trio Rho guanine nucleotide exchange factor
ENSG00000129474	AJUBA	2164.57	0.679742	0.266978	2.54606	0.0108946	0.156367	ajuba LIM protein
ENSG00000237819	CDK6-AS1	8.32888	-5.34834	2.10137	-2.54517	0.0109224	0.15661	CDK6 antisense RNA 1
ENSG00000197622	CDC42SE1	828.27	-0.714765	0.280964	-2.54397	0.01096	0.156991	CDC42 small effector 1
ENSG00000254470	AP5B1	238.772	-0.933145	0.367266	-2.54079	0.0110603	0.158269	adaptor related protein complex 5 subunit beta 1
ENSG00000259129	LINC00648	74.6799	1.54515	0.608546	2.53909	0.0111142	0.158881	long intergenic non-protein coding RNA 648
ENSG00000141349	G6PC3	574.814	-0.724548	0.285441	-2.53834	0.0111378	0.1589	glucose-6-phosphatase catalytic subunit 3
ENSG00000078401	EDN1	2005.49	-1.00185	0.394729	-2.53808	0.0111463	0.1589	endothelin 1
ENSG00000005379	TSPOAP1	61.1719	-1.7584	0.69283	-2.538	0.0111487	0.1589	TSPO associated protein 1
ENSG00000144935	TRPC1	233.408	0.985356	0.388742	2.53473	0.0112534	0.160232	transient receptor potential cation channel subfamily C member 1
ENSG00000128272	ATF4	3856.7	0.636419	0.251345	2.53206	0.0113395	0.161298	activating transcription factor 4
ENSG00000150961	SEC24D	1042.65	0.653143	0.258037	2.5312	0.0113673	0.161533	SEC24 homolog D	COPII coat complex component
ENSG00000268043	NBPF12	185.794	-1.05596	0.417271	-2.53062	0.0113861	0.16164	NBPF member 12
ENSG00000155324	GRAMD2B	642.45	-0.708731	0.28017	-2.52965	0.0114176	0.161767	GRAM domain containing 2B
ENSG00000039523	RIPOR1	1854.59	0.621022	0.245497	2.52965	0.0114177	0.161767	RHO family interacting cell polarization regulator 1
ENSG00000125656	CLPP	1107.12	-0.81281	0.321446	-2.5286	0.0114517	0.162011	caseinolytic mitochondrial matrix peptidase proteolytic subunit
ENSG00000174444	RPL4	23035.4	-0.589394	0.233107	-2.52843	0.0114575	0.162011	ribosomal protein L4
ENSG00000157064	NMNAT2	1090.59	0.722682	0.285929	2.52749	0.0114882	0.162226	nicotinamide nucleotide adenylyltransferase 2
ENSG00000103642	LACTB	772.559	-0.72106	0.285314	-2.52725	0.0114961	0.162226	lactamase beta
ENSG00000139842	CUL4A	2893.83	0.628673	0.24879	2.52692	0.0115067	0.162226	cullin 4A
ENSG00000154040	CABYR	37.1101	2.04816	0.810829	2.52601	0.0115367	0.162489	calcium binding tyrosine phosphorylation regulated
ENSG00000144827	ABHD10	1240.57	0.648545	0.257294	2.52064	0.0117142	0.164827	abhydrolase domain containing 10	depalmitoylase
ENSG00000156463	SH3RF2	818.674	-0.755312	0.299789	-2.51948	0.0117529	0.165209	SH3 domain containing ring finger 2
ENSG00000035141	FAM136A	1923.83	-0.703436	0.279332	-2.51828	0.011793	0.165611	family with sequence similarity 136 member A
ENSG00000103494	RPGRIP1L	194.882	1.01334	0.402525	2.51745	0.0118207	0.165837	RPGRIP1 like
ENSG00000103490	PYCARD	24.8175	2.41466	0.96049	2.51399	0.0119373	0.167086	PYD and CARD domain containing
ENSG00000145934	TENM2	9.40418	-4.50628	1.79316	-2.51304	0.0119695	0.167086	teneurin transmembrane protein 2
ENSG00000062282	DGAT2	73.5676	1.88867	0.751563	2.51298	0.0119715	0.167086	diacylglycerol O-acyltransferase 2
ENSG00000044090	CUL7	789.716	-0.864193	0.343932	-2.51269	0.0119816	0.167086	cullin 7
NA	IKBKB-DT	6.34868	5.79387	2.30601	2.51251	0.0119877	0.167086	IKBKB divergent transcript
ENSG00000101608	MYL12A	2950.86	0.604421	0.240579	2.51236	0.0119925	0.167086	myosin light chain 12A
ENSG00000126970	ZC4H2	145.748	1.09979	0.437781	2.51219	0.0119985	0.167086	zinc finger C4H2-type containing
ENSG00000158089	GALNT14	5.27725	-6.16809	2.45598	-2.51145	0.0120235	0.167086	polypeptide N-acetylgalactosaminyltransferase 14
ENSG00000165282	PIGO	502.09	-0.789847	0.314499	-2.51145	0.0120238	0.167086	phosphatidylinositol glycan anchor biosynthesis class O
ENSG00000106537	TSPAN13	150.73	1.06451	0.423875	2.51137	0.0120264	0.167086	tetraspanin 13
ENSG00000166813	KIF7	149.34	1.08412	0.43182	2.51057	0.0120535	0.167301	kinesin family member 7
ENSG00000169116	PARM1	143.299	1.08745	0.433232	2.51007	0.0120706	0.167375	prostate androgen-regulated mucin-like protein 1
ENSG00000106003	LFNG	153.437	1.28282	0.511648	2.50724	0.0121679	0.168562	LFNG O-fucosylpeptide 3-beta-N-acetylglucosaminyltransferase
ENSG00000117151	CTBS	696.461	0.769074	0.307105	2.50427	0.0122705	0.169615	chitobiase
ENSG00000117472	TSPAN1	72.8268	-1.47251	0.588086	-2.5039	0.0122833	0.169615	tetraspanin 1
ENSG00000169032	MAP2K1	1666.97	-0.609156	0.243301	-2.50372	0.0122897	0.169615	mitogen-activated protein kinase kinase 1
ENSG00000115425	PECR	118.623	1.30799	0.522429	2.50367	0.0122913	0.169615	peroxisomal trans-2-enoyl-CoA reductase
ENSG00000148572	NRBF2	656.341	0.788225	0.315005	2.50226	0.0123402	0.170074	nuclear receptor binding factor 2
ENSG00000124225	PMEPA1	191.819	-1.06009	0.42369	-2.50203	0.0123483	0.170074	prostate transmembrane protein	androgen induced 1
ENSG00000118515	SGK1	325.684	-0.862209	0.344695	-2.50137	0.0123713	0.170228	serum/glucocorticoid regulated kinase 1
ENSG00000095319	NUP188	3125.89	-0.770634	0.308355	-2.49918	0.0124482	0.170981	nucleoporin 188
ENSG00000272325	NUDT3	230.259	-0.992013	0.396944	-2.49913	0.01245	0.170981	nudix hydrolase 3
ENSG00000121064	SCPEP1	607.172	0.739265	0.296028	2.49728	0.0125151	0.171711	serine carboxypeptidase 1
ENSG00000079691	CARMIL1	430.243	-0.808895	0.324095	-2.49586	0.0125653	0.172015	capping protein regulator and myosin 1 linker 1
NA	NA	21.9041	2.588	1.03695	2.49579	0.0125676	0.172015	NA
ENSG00000163930	BAP1	1510.75	-0.613613	0.245907	-2.49531	0.0125848	0.172015	BRCA1 associated protein 1
ENSG00000167861	HID1	288.662	1.01203	0.405575	2.49529	0.0125853	0.172015	HID1 domain containing
ENSG00000047617	ANO2	5.70851	-6.26358	2.51202	-2.49344	0.0126511	0.172584	anoctamin 2
ENSG00000071991	CDH19	5.70851	-6.26358	2.51202	-2.49344	0.0126511	0.172584	cadherin 19
ENSG00000176749	CDK5R1	119.442	-1.28999	0.517428	-2.49308	0.0126639	0.172595	cyclin dependent kinase 5 regulatory subunit 1
ENSG00000185753	CXorf38	397.931	0.777273	0.311963	2.49156	0.0127184	0.173174	chromosome X open reading frame 38
ENSG00000101849	TBL1X	776.996	-0.689412	0.276748	-2.49112	0.0127341	0.173222	transducin beta like 1 X-linked
NA	LINC00470	7.89569	-5.28229	2.12118	-2.49026	0.012765	0.173478	long intergenic non-protein coding RNA 470
ENSG00000023171	GRAMD1B	9.65549	-4.54574	1.82704	-2.48803	0.0128453	0.174362	GRAM domain containing 1B
ENSG00000138604	GLCE	987.967	-0.667183	0.268184	-2.48778	0.0128544	0.174362	glucuronic acid epimerase
ENSG00000241058	NSUN6	323.551	0.824477	0.331505	2.48708	0.0128798	0.174488	NOP2/Sun RNA methyltransferase 6
ENSG00000140521	POLG	973.447	-0.6855	0.275652	-2.48683	0.0128885	0.174488	DNA polymerase gamma	catalytic subunit
ENSG00000067715	SYT1	108.605	1.25582	0.505075	2.4864	0.0129043	0.174488	synaptotagmin 1
ENSG00000198218	QRICH1	1664	-0.608915	0.24492	-2.48618	0.0129124	0.174488	glutamine rich 1
ENSG00000232774	LINC03033	50.5586	1.71164	0.688684	2.48538	0.0129412	0.174679	long intergenic non-protein coding RNA 3033
ENSG00000097046	CDC7	992.306	0.724769	0.291644	2.48512	0.012951	0.174679	cell division cycle 7
ENSG00000074181	NOTCH3	42.1195	2.13259	0.859316	2.48173	0.0130745	0.176097	notch receptor 3
ENSG00000122786	CALD1	1293.55	-0.701504	0.282686	-2.48156	0.0130807	0.176097	caldesmon 1
ENSG00000184005	ST6GALNAC3	9.40033	-4.49986	1.8139	-2.48076	0.0131103	0.17633	ST6 N-acetylgalactosaminide alpha-2	6-sialyltransferase 3
ENSG00000088682	COQ9	501.216	0.72919	0.29438	2.47704	0.0132478	0.178013	coenzyme Q9
ENSG00000131746	TNS4	22.2782	-2.49734	1.00849	-2.47632	0.0132743	0.178202	tensin 4
ENSG00000126062	TMEM115	491.153	-0.749646	0.30309	-2.47335	0.0133853	0.179524	transmembrane protein 115
ENSG00000177352	CCDC71	151.993	-1.0713	0.433245	-2.47275	0.0134079	0.179658	coiled-coil domain containing 71
ENSG00000185236	RAB11B	1457.54	-0.683485	0.276519	-2.47174	0.0134456	0.179995	RAB11B	member RAS oncogene family
ENSG00000251350	LINC02475	56.6064	1.65846	0.671079	2.47133	0.0134611	0.180018	long intergenic non-protein coding RNA 2475
ENSG00000124795	DEK	13464.5	-0.557045	0.225444	-2.47088	0.0134782	0.180018	DEK proto-oncogene
ENSG00000145555	MYO10	2735.23	-0.597152	0.241729	-2.47034	0.0134986	0.180018	myosin X
ENSG00000147316	MCPH1	438.194	0.901756	0.365064	2.47013	0.0135064	0.180018	microcephalin 1
ENSG00000166128	RAB8B	2042.79	-0.628903	0.254614	-2.47003	0.0135101	0.180018	RAB8B	member RAS oncogene family
ENSG00000150275	PCDH15	15.005	3.60792	1.46168	2.46833	0.0135745	0.180707	protocadherin related 15
ENSG00000151849	CENPJ	699.529	0.688712	0.279116	2.46747	0.0136071	0.180848	centromere protein J
ENSG00000178031	ADAMTSL1	379.669	0.78876	0.319674	2.46739	0.0136103	0.180848	ADAMTS like 1
ENSG00000140474	ULK3	288.542	-0.839461	0.340282	-2.46695	0.0136268	0.1809	unc-51 like kinase 3
ENSG00000112651	MRPL2	1565.06	-0.651913	0.264311	-2.46646	0.0136457	0.180922	mitochondrial ribosomal protein L2
ENSG00000141994	DUS3L	325.286	-1.04584	0.424061	-2.46624	0.0136538	0.180922	dihydrouridine synthase 3 like
ENSG00000125848	FLRT3	5.28689	-6.19441	2.51226	-2.46567	0.0136757	0.181044	fibronectin leucine rich transmembrane protein 3
ENSG00000164638	SLC29A4	31.1015	2.28141	0.925859	2.4641	0.0137358	0.181673	solute carrier family 29 member 4
ENSG00000107874	CUEDC2	1439.34	0.636592	0.258493	2.46271	0.0137893	0.182212	CUE domain containing 2
ENSG00000205336	ADGRG1	503.021	1.08917	0.442445	2.46171	0.0138278	0.182552	adhesion G protein-coupled receptor G1
ENSG00000169247	SH3TC2	621.478	1.12069	0.455438	2.4607	0.0138667	0.182897	SH3 domain and tetratricopeptide repeats 2
ENSG00000115380	EFEMP1	553.5	-0.92638	0.376588	-2.45993	0.0138964	0.18312	EGF containing fibulin extracellular matrix protein 1
ENSG00000115415	STAT1	2320.7	0.59429	0.241657	2.45923	0.0139237	0.183312	signal transducer and activator of transcription 1
ENSG00000269713	NBPF9	844.747	-0.71063	0.289253	-2.45678	0.014019	0.184397	NBPF member 9
ENSG00000006282	SPATA20	589.995	0.891673	0.363093	2.45577	0.0140583	0.184744	spermatogenesis associated 20
ENSG00000134716	CYP2J2	130.619	1.13145	0.460933	2.45469	0.0141004	0.185128	cytochrome P450 family 2 subfamily J member 2
ENSG00000163898	LIPH	258.228	1.3454	0.548211	2.45416	0.0141214	0.185233	lipase H
ENSG00000100219	XBP1	831.324	0.696422	0.283954	2.45259	0.0141833	0.185876	X-box binding protein 1
ENSG00000146676	PURB	2066.1	-0.590481	0.240868	-2.45147	0.0142275	0.186262	purine rich element binding protein B
ENSG00000105364	MRPL4	1851.5	-0.72558	0.296012	-2.45118	0.0142388	0.186262	mitochondrial ribosomal protein L4
ENSG00000154134	ROBO3	227.781	0.98679	0.402661	2.45067	0.014259	0.186356	roundabout guidance receptor 3
ENSG00000112312	GMNN	1772.81	-0.674365	0.27535	-2.44912	0.0143207	0.186992	geminin DNA replication inhibitor
ENSG00000172053	QARS1	2369.5	-0.58554	0.239174	-2.44818	0.014358	0.187308	glutaminyl-tRNA synthetase 1
ENSG00000115539	PDCL3	780.159	-0.710277	0.290168	-2.44781	0.0143727	0.187329	phosducin like 3
ENSG00000138172	CALHM2	812.189	0.817226	0.33423	2.4451	0.0144811	0.188571	calcium homeostasis modulator family member 2
ENSG00000151093	OXSM	156.794	-1.09484	0.447976	-2.44397	0.0145267	0.188993	3-oxoacyl-ACP synthase	mitochondrial
ENSG00000101695	RNF125	163.16	-1.01598	0.415903	-2.44282	0.014573	0.189422	ring finger protein 125
ENSG00000180776	ZDHHC20	2523.93	0.599944	0.24577	2.44108	0.0146435	0.189964	zinc finger DHHC-type palmitoyltransferase 20
ENSG00000103855	CD276	615.047	-0.719609	0.294841	-2.44066	0.0146603	0.189964	CD276 molecule
ENSG00000137273	FOXF2	100.121	-1.19696	0.490445	-2.44056	0.0146644	0.189964	forkhead box F2
ENSG00000065054	NHERF2	1676.44	0.641604	0.2629	2.44048	0.0146677	0.189964	NHERF family PDZ scaffold protein 2
ENSG00000186205	MTARC1	163.43	1.05567	0.432795	2.4392	0.0147198	0.190467	mitochondrial amidoxime reducing component 1
ENSG00000147145	LPAR4	52.9202	1.60878	0.659685	2.43871	0.0147399	0.190554	lysophosphatidic acid receptor 4
ENSG00000154133	ROBO4	496.687	0.941546	0.386203	2.43795	0.0147707	0.190781	roundabout guidance receptor 4
ENSG00000164091	WDR82	2465.13	-0.708053	0.290471	-2.4376	0.0147851	0.190794	WD repeat domain 82
ENSG00000198624	CCDC69	849.924	0.731577	0.300392	2.43541	0.014875	0.191651	coiled-coil domain containing 69
ENSG00000214357	NEURL1B	371.899	0.880793	0.361693	2.4352	0.0148837	0.191651	neuralized E3 ubiquitin protein ligase 1B
ENSG00000145476	CYP4V2	173.966	-0.973956	0.399981	-2.435	0.0148916	0.191651	cytochrome P450 family 4 subfamily V member 2
ENSG00000112308	C6orf62	4490	-0.559447	0.229805	-2.43444	0.0149147	0.191776	chromosome 6 open reading frame 62
ENSG00000106078	COBL	221.725	-0.897563	0.368788	-2.43382	0.0149406	0.191936	cordon-bleu WH2 repeat protein
ENSG00000154319	FAM167A	418.777	0.748056	0.307506	2.43266	0.0149885	0.192379	family with sequence similarity 167 member A
ENSG00000103005	USB1	941.298	0.639352	0.263169	2.42944	0.0151222	0.193921	U6 snRNA biogenesis phosphodiesterase 1
ENSG00000152495	CAMK4	154.243	1.11108	0.458605	2.42273	0.0154043	0.197363	calcium/calmodulin dependent protein kinase IV
ENSG00000100304	TTLL12	971.69	-0.732315	0.302338	-2.42217	0.0154281	0.197491	tubulin tyrosine ligase like 12
ENSG00000251381	LINC00958	5.99831	5.71153	2.35881	2.42137	0.0154623	0.197751	long intergenic non-protein coding RNA 958
ENSG00000088448	ANKRD10	564.755	0.758438	0.313342	2.42048	0.0155002	0.19806	ankyrin repeat domain 10
ENSG00000175455	CCDC14	2504.3	0.657502	0.271813	2.41894	0.0155656	0.198718	coiled-coil domain containing 14
ENSG00000169118	CSNK1G1	467.41	-0.726267	0.300435	-2.41738	0.0156325	0.199395	casein kinase 1 gamma 1
ENSG00000099800	TIMM13	884.615	-0.728612	0.301504	-2.41659	0.0156664	0.19965	translocase of inner mitochondrial membrane 13
ENSG00000134339	SAA2	8.75055	-4.40852	1.82639	-2.41379	0.0157875	0.201014	serum amyloid A2
ENSG00000095787	WAC	2921.11	0.579377	0.240083	2.41324	0.0158115	0.201141	WW domain containing adaptor with coiled-coil
ENSG00000122218	COPA	3850.43	0.554436	0.229913	2.4115	0.0158868	0.201727	COPI coat complex subunit alpha
ENSG00000178053	MLF1	654.317	0.70137	0.290868	2.4113	0.0158958	0.201727	myeloid leukemia factor 1
ENSG00000271601	LIX1L	1437.51	-0.691858	0.286936	-2.41119	0.0159005	0.201727	limb and CNS expressed 1 like
ENSG00000122711	SPINK4	10.2909	-4.01536	1.66551	-2.41088	0.0159139	0.201727	serine peptidase inhibitor Kazal type 4
ENSG00000171631	P2RY6	6.09921	5.73648	2.37989	2.41039	0.0159353	0.201819	pyrimidinergic receptor P2Y6
ENSG00000198382	UVRAG	394.267	0.762354	0.3165	2.4087	0.0160095	0.20258	UV radiation resistance associated
ENSG00000095203	EPB41L4B	992.315	-0.649351	0.269729	-2.40742	0.0160658	0.202939	erythrocyte membrane protein band 4.1 like 4B
ENSG00000204128	C2orf72	45.0167	1.87434	0.77857	2.40741	0.0160663	0.202939	chromosome 2 open reading frame 72
ENSG00000160799	CCDC12	646.278	-0.702163	0.291887	-2.4056	0.016146	0.203767	coiled-coil domain containing 12
ENSG00000102908	NFAT5	2104.18	0.626823	0.260629	2.40504	0.0161706	0.203792	nuclear factor of activated T cells 5
ENSG00000013016	EHD3	19.448	2.67079	1.11056	2.40491	0.0161765	0.203792	EH domain containing 3
ENSG00000115902	SLC1A4	195.877	-1.00068	0.416309	-2.4037	0.0162299	0.204286	solute carrier family 1 member 4
ENSG00000130164	LDLR	3400.82	-0.567573	0.23623	-2.40263	0.0162779	0.204456	low density lipoprotein receptor
ENSG00000178802	MPI	573.369	-0.687016	0.285946	-2.40261	0.0162787	0.204456	mannose phosphate isomerase
ENSG00000170266	GLB1	685.505	-0.719476	0.299552	-2.40184	0.016313	0.204456	galactosidase beta 1
ENSG00000153179	RASSF3	915.151	-0.729221	0.303622	-2.40174	0.0163172	0.204456	Ras association domain family member 3
ENSG00000133104	SPART	1536.75	0.594225	0.247435	2.40153	0.0163265	0.204456	spartin
ENSG00000224287	MSL3P1	444.234	0.726884	0.302682	2.40148	0.0163291	0.204456	MSL complex subunit 3 pseudogene 1
ENSG00000023902	PLEKHO1	253.524	-0.85211	0.355248	-2.39864	0.0164563	0.205868	pleckstrin homology domain containing O1
ENSG00000118939	UCHL3	1044.88	0.725762	0.303053	2.39484	0.0166278	0.207833	ubiquitin C-terminal hydrolase L3
NA	SLCO1B7	81.9787	1.30669	0.545778	2.39417	0.0166578	0.208027	solute carrier organic anion transporter family member 1B7 (putative)
ENSG00000187678	SPRY4	2075.45	0.632424	0.264285	2.39296	0.016713	0.208342	sprouty RTK signaling antagonist 4
ENSG00000141448	GATA6	289.366	-0.814396	0.340362	-2.39274	0.0167232	0.208342	GATA binding protein 6
ENSG00000163191	S100A11	3515.45	-0.614765	0.256969	-2.39237	0.0167401	0.208342	S100 calcium binding protein A11
ENSG00000163918	RFC4	1641.44	0.622983	0.260411	2.39231	0.0167427	0.208342	replication factor C subunit 4
ENSG00000167522	ANKRD11	2975.96	0.56004	0.234128	2.39202	0.0167558	0.208342	ankyrin repeat domain containing 11
NA	RNR1	9243.47	0.629023	0.263085	2.39095	0.0168049	0.208706	s-rRNA
ENSG00000167034	NKX3-1	180.283	-1.01101	0.422886	-2.39075	0.0168142	0.208706	NK3 homeobox 1
ENSG00000169429	CXCL8	3118.86	-0.57085	0.238875	-2.38974	0.0168602	0.209096	C-X-C motif chemokine ligand 8
ENSG00000114383	TUSC2	466.472	-0.737625	0.308971	-2.38736	0.0169699	0.21023	tumor suppressor 2	mitochondrial calcium regulator
ENSG00000280165	PCDH20	82.8412	1.49559	0.626558	2.38699	0.0169867	0.21023	protocadherin 20
ENSG00000176659	LINC02910	13.1275	3.59162	1.50478	2.3868	0.0169957	0.21023	long intergenic non-protein coding RNA 2910
ENSG00000125651	GTF2F1	2703.95	-0.634724	0.265985	-2.38632	0.017018	0.210325	general transcription factor IIF subunit 1
ENSG00000103479	RBL2	767.4	0.888886	0.3729	2.38371	0.0171391	0.211639	RB transcriptional corepressor like 2
ENSG00000124596	OARD1	986.464	-0.626838	0.263073	-2.38276	0.0171835	0.211853	O-acyl-ADP-ribose deacylase 1
ENSG00000197557	IFT70A	93.1955	1.23344	0.517678	2.38263	0.0171895	0.211853	intraflagellar transport 70A
ENSG00000197713	RPE	1019.7	0.629471	0.264219	2.38239	0.0172008	0.211853	ribulose-5-phosphate-3-epimerase
ENSG00000181444	ZNF467	39.3672	2.36282	0.9924	2.38091	0.0172699	0.21237	zinc finger protein 467
ENSG00000169018	FEM1B	1171.39	-0.602032	0.252864	-2.38086	0.0172725	0.21237	fem-1 homolog B
ENSG00000119041	GTF3C3	668.087	0.659108	0.277388	2.37613	0.0174955	0.214928	general transcription factor IIIC subunit 3
ENSG00000135414	GDF11	314.049	-0.8098	0.340854	-2.3758	0.017511	0.214934	growth differentiation factor 11
ENSG00000198901	PRC1	3677.84	-0.678904	0.28593	-2.37437	0.0175788	0.215581	protein regulator of cytokinesis 1
ENSG00000139737	SLAIN1	513.762	0.764724	0.322264	2.37297	0.0176456	0.216038	SLAIN motif family member 1
ENSG00000135926	TMBIM1	2154.52	0.625421	0.263562	2.37296	0.0176462	0.216038	transmembrane BAX inhibitor motif containing 1
ENSG00000163938	GNL3	3908.37	-0.63379	0.267184	-2.37211	0.0176867	0.216349	G protein nucleolar 3
ENSG00000150625	GPM6A	15.3881	3.2323	1.36297	2.37151	0.0177155	0.216371	glycoprotein M6A
ENSG00000225950	NTF4	5.74209	5.6491	2.38214	2.37144	0.0177187	0.216371	neurotrophin 4
ENSG00000068079	IFI35	230.671	0.88124	0.371813	2.37011	0.0177826	0.216912	interferon induced protein 35
ENSG00000010626	LRRC23	44.694	1.96038	0.827204	2.36989	0.0177933	0.216912	leucine rich repeat containing 23
ENSG00000225206	MIR137HG	178.474	-1.11769	0.471828	-2.36886	0.017843	0.217332	MIR137 host gene
ENSG00000167889	MGAT5B	135.476	1.12167	0.473744	2.36768	0.0179001	0.217627	alpha-1	6-mannosylglycoprotein 6-beta-N-acetylglucosaminyltransferase B
ENSG00000183048	SLC25A10	443.078	-0.742687	0.313695	-2.36755	0.0179065	0.217627	solute carrier family 25 member 10
ENSG00000102805	CLN5	320.867	0.800091	0.33796	2.36742	0.0179128	0.217627	CLN5 intracellular trafficking protein
ENSG00000172775	PSME3IP1	1354.3	0.592776	0.25054	2.366	0.0179817	0.218203	proteasome activator subunit 3 interacting protein 1
ENSG00000291137	GBAP1	102.543	1.2819	0.541862	2.36574	0.0179943	0.218203	glucosylceramidase beta pseudogene 1
ENSG00000165171	METTL27	73.3427	1.39479	0.589641	2.3655	0.0180059	0.218203	methyltransferase like 27
ENSG00000083937	CHMP2B	1165.77	-0.615559	0.260268	-2.3651	0.0180254	0.218255	charged multivesicular body protein 2B
ENSG00000248698	LINC01085	15.5164	3.24669	1.37298	2.3647	0.0180447	0.218299	long intergenic non-protein coding RNA 1085
ENSG00000143420	ENSA	1911.49	-0.56696	0.239791	-2.3644	0.0180595	0.218299	endosulfine alpha
ENSG00000138641	HERC3	465.561	0.770093	0.325819	2.36356	0.0181003	0.218487	HECT and RLD domain containing E3 ubiquitin protein ligase 3
ENSG00000117305	HMGCL	259.813	0.92015	0.389332	2.36341	0.0181077	0.218487	3-hydroxy-3-methylglutaryl-CoA lyase
ENSG00000169302	STK32A	30.8731	2.14148	0.906202	2.36314	0.0181208	0.218487	serine/threonine kinase 32A
ENSG00000261801	LOXL1-AS1	290.127	-0.824507	0.34905	-2.36214	0.0181696	0.218582	LOXL1 antisense RNA 1
ENSG00000121310	ECHDC2	286.142	-0.889223	0.376447	-2.36214	0.0181696	0.218582	enoyl-CoA hydratase domain containing 2
ENSG00000087095	NLK	396.799	-0.768966	0.325551	-2.36204	0.0181745	0.218582	nemo like kinase
ENSG00000168389	MFSD2A	96.7326	-1.21508	0.514699	-2.36075	0.0182378	0.219159	MFSD2 lysolipid transporter A	lysophospholipid
ENSG00000145911	N4BP3	8.54168	-4.33981	1.83902	-2.35985	0.0182822	0.219509	NEDD4 binding protein 3
ENSG00000118971	CCND2	65.5619	-1.61694	0.68571	-2.35806	0.0183707	0.220193	cyclin D2
ENSG00000152359	POC5	448.243	0.73347	0.31105	2.35804	0.0183717	0.220193	POC5 centriolar protein
ENSG00000116809	ZBTB17	344.273	0.771452	0.327196	2.35776	0.0183854	0.220193	zinc finger and BTB domain containing 17
ENSG00000170312	CDK1	4109.99	0.55273	0.234492	2.35714	0.0184163	0.220193	cyclin dependent kinase 1
ENSG00000229558	SACS-AS1	6.14555	-6.37245	2.70355	-2.35707	0.01842	0.220193	SACS antisense RNA 1
ENSG00000107821	KAZALD1	510.092	0.701278	0.297551	2.35684	0.0184314	0.220193	Kazal type serine peptidase inhibitor domain 1
ENSG00000101441	CST4	23.2474	-3.03581	1.28872	-2.35568	0.0184888	0.220667	cystatin S
ENSG00000255874	PRECSIT	6.26764	5.77593	2.45231	2.35531	0.0185075	0.220667	p53 regulated carcinoma associated Stat3 activating long intergenic non-protein coding transcript
ENSG00000172888	ZNF621	1021.26	-0.668516	0.283869	-2.35502	0.0185217	0.220667	zinc finger protein 621
ENSG00000185567	AHNAK2	2085.82	0.903492	0.38375	2.35438	0.0185539	0.220667	AHNAK nucleoprotein 2
ENSG00000152377	SPOCK1	36.0275	-2.02483	0.860096	-2.35419	0.018563	0.220667	SPARC (osteonectin)	cwcv and kazal like domains proteoglycan 1
ENSG00000134882	UBAC2	901.536	0.646164	0.274475	2.35418	0.0185635	0.220667	UBA domain containing 2
ENSG00000110852	CLEC2B	268.379	1.08981	0.463675	2.35038	0.0187542	0.222749	C-type lectin domain family 2 member B
ENSG00000122026	RPL21	6919.12	0.53218	0.226507	2.34951	0.0187981	0.223085	ribosomal protein L21
ENSG00000152642	GPD1L	395.646	-0.778948	0.331748	-2.34801	0.0188741	0.223801	glycerol-3-phosphate dehydrogenase 1 like
ENSG00000198056	PRIM1	506.626	0.727434	0.309912	2.34722	0.0189139	0.224088	DNA primase subunit 1
ENSG00000136155	SCEL	17.1046	3.1723	1.35176	2.3468	0.0189355	0.224159	sciellin
ENSG00000124613	ZNF391	132.612	-1.07241	0.457248	-2.34536	0.019009	0.224843	zinc finger protein 391
ENSG00000133816	MICAL2	2897.62	-0.606921	0.258997	-2.34335	0.0191114	0.225868	microtubule associated monooxygenase	calponin and LIM domain containing 2
ENSG00000000971	CFH	307.222	0.908435	0.387761	2.34277	0.0191413	0.2259	complement factor H
ENSG00000136754	ABI1	1218.01	0.617536	0.26363	2.34243	0.0191585	0.2259	abl interactor 1
ENSG00000135119	RNFT2	118.677	1.15451	0.492895	2.3423	0.0191654	0.2259	ring finger protein	transmembrane 2
ENSG00000122507	BBS9	212.808	0.901301	0.384891	2.3417	0.019196	0.2259	Bardet-Biedl syndrome 9
ENSG00000111962	UST	111.828	1.13589	0.48517	2.34123	0.0192205	0.2259	uronyl 2-sulfotransferase
ENSG00000152270	PDE3B	229.179	-0.896468	0.382907	-2.34122	0.0192211	0.2259	phosphodiesterase 3B
ENSG00000196611	MMP1	16532.5	-2.07052	0.884403	-2.34115	0.0192245	0.2259	matrix metallopeptidase 1
ENSG00000114126	TFDP2	1412.37	0.673955	0.288114	2.3392	0.0193252	0.226797	transcription factor Dp-2
ENSG00000135074	ADAM19	372.338	-0.759877	0.324904	-2.33878	0.0193471	0.226797	ADAM metallopeptidase domain 19
ENSG00000100439	ABHD4	580.298	0.725515	0.31025	2.33848	0.0193622	0.226797	abhydrolase domain containing 4	N-acyl phospholipase B
ENSG00000130340	SNX9	838.879	-0.701516	0.299993	-2.33845	0.0193642	0.226797	sorting nexin 9
ENSG00000158856	DMTN	21.8605	-2.35816	1.00861	-2.33804	0.0193851	0.226857	dematin actin binding protein
ENSG00000198517	MAFK	413.431	-0.764882	0.327227	-2.33746	0.019415	0.226948	MAF bZIP transcription factor K
ENSG00000266338	NBPF15	1045.96	-0.608938	0.260582	-2.33684	0.0194477	0.226948	NBPF member 15
ENSG00000129636	ITFG1	633.039	0.77202	0.330437	2.33636	0.0194726	0.226948	integrin alpha FG-GAP repeat containing 1
ENSG00000163608	NEPRO	1146.31	0.605239	0.259056	2.33633	0.0194742	0.226948	nucleolus and neural progenitor protein
ENSG00000183060	LYSMD4	79.1343	-1.31166	0.561516	-2.33592	0.0194952	0.226948	LysM domain containing 4
ENSG00000227477	STK4-DT	5.58042	5.60753	2.40065	2.33583	0.0195	0.226948	STK4 divergent transcript
ENSG00000168685	IL7R	433.963	0.801269	0.343044	2.33576	0.0195038	0.226948	interleukin 7 receptor
ENSG00000237943	PRKCQ-AS1	42.4534	-1.70565	0.730559	-2.33472	0.0195579	0.227392	PRKCQ antisense RNA 1
ENSG00000102007	PLP2	2613.6	-0.551513	0.236272	-2.33423	0.0195838	0.22742	proteolipid protein 2
ENSG00000197472	ZNF695	62.9824	1.52046	0.651435	2.33401	0.0195951	0.22742	zinc finger protein 695
ENSG00000158887	MPZ	12.1917	3.47887	1.49076	2.33362	0.0196155	0.22742	myelin protein zero
ENSG00000198814	GK	77.5416	1.30428	0.558947	2.33346	0.0196238	0.22742	glycerol kinase
ENSG00000138175	ARL3	1983.67	0.570429	0.244538	2.33268	0.0196648	0.227711	ADP ribosylation factor like GTPase 3
ENSG00000107263	RAPGEF1	1033.54	-0.60719	0.26039	-2.33185	0.0197088	0.228036	Rap guanine nucleotide exchange factor 1
ENSG00000104689	TNFRSF10A	350.464	-0.764986	0.328197	-2.33087	0.01976	0.228275	TNF receptor superfamily member 10a
ENSG00000112578	BYSL	1654.81	-0.946788	0.406199	-2.33085	0.0197613	0.228275	bystin like
ENSG00000154518	ATP5MC3	3377.73	0.560648	0.240825	2.32803	0.0199105	0.229813	ATP synthase membrane subunit c locus 3
ENSG00000180228	PRKRA	581.355	0.664662	0.285644	2.32689	0.019971	0.230154	protein activator of interferon induced protein kinase EIF2AK2
ENSG00000166913	YWHAB	8487.02	-0.534816	0.229843	-2.32687	0.0199721	0.230154	tyrosine 3-monooxygenase/tryptophan 5-monooxygenase activation protein beta
ENSG00000169515	CCDC8	139.94	1.014	0.435901	2.32621	0.0200076	0.230376	coiled-coil domain containing 8
ENSG00000235194	PPP1R3E	69.699	-1.39583	0.600399	-2.32484	0.0200804	0.23103	protein phosphatase 1 regulatory subunit 3E
ENSG00000221821	C6orf226	88.4947	-1.27536	0.548712	-2.32427	0.0201108	0.231193	chromosome 6 open reading frame 226
ENSG00000107140	TESK1	165.027	-0.973975	0.419411	-2.32225	0.0202197	0.232178	testis associated actin remodelling kinase 1
ENSG00000064726	BTBD1	2505.57	-0.549959	0.236844	-2.32203	0.0202312	0.232178	BTB domain containing 1
ENSG00000257093	DENND11	16.2339	3.17809	1.3689	2.32164	0.0202522	0.232178	DENN domain containing 11
ENSG00000122970	IFT81	679.004	0.705355	0.303839	2.32147	0.0202613	0.232178	intraflagellar transport 81
ENSG00000145860	RNF145	1891.12	-0.560212	0.2414	-2.32068	0.0203044	0.232333	ring finger protein 145
ENSG00000140332	TLE3	642.149	-0.757208	0.326296	-2.32062	0.0203076	0.232333	TLE family member 3	transcriptional corepressor
ENSG00000229373	LINC00452	139.79	1.08865	0.469293	2.31976	0.020354	0.232333	long intergenic non-protein coding RNA 452
ENSG00000144560	VGLL4	243	-0.8833	0.3808	-2.31959	0.0203631	0.232333	vestigial like family member 4
ENSG00000166349	RAG1	10.2877	4.23477	1.82571	2.31952	0.020367	0.232333	recombination activating 1
ENSG00000113140	SPARC	12.3997	3.50381	1.51064	2.31942	0.0203721	0.232333	secreted protein acidic and cysteine rich
ENSG00000109654	TRIM2	215.038	1.05593	0.455532	2.31801	0.0204488	0.233022	tripartite motif containing 2
ENSG00000114251	WNT5A	117.479	-1.42686	0.616065	-2.31609	0.0205535	0.233924	Wnt family member 5A
ENSG00000109819	PPARGC1A	284.872	1.0423	0.450052	2.31596	0.0205606	0.233924	PPARG coactivator 1 alpha
ENSG00000136738	STAM	1247.88	0.621162	0.268255	2.31556	0.020582	0.233982	signal transducing adaptor molecule
ENSG00000153551	CMTM7	560.848	-0.661737	0.285961	-2.31408	0.0206632	0.234709	CKLF like MARVEL transmembrane domain containing 7
ENSG00000134242	PTPN22	257.173	1.05928	0.457868	2.31351	0.0206945	0.234709	protein tyrosine phosphatase non-receptor type 22
ENSG00000112130	RNF8	1196.39	-0.602004	0.260214	-2.3135	0.0206952	0.234709	ring finger protein 8
ENSG00000188290	HES4	108.334	-1.10653	0.478681	-2.31162	0.0207984	0.235659	hes family bHLH transcription factor 4
ENSG00000167107	ACSF2	435.206	0.767181	0.331934	2.31124	0.0208195	0.235659	acyl-CoA synthetase family member 2
ENSG00000121741	ZMYM2	968.796	0.669481	0.289683	2.31108	0.0208283	0.235659	zinc finger MYM-type containing 2
ENSG00000167653	PSCA	19.3998	2.71318	1.17417	2.31072	0.0208486	0.235703	prostate stem cell antigen
ENSG00000185043	CIB1	1078.04	-0.591033	0.255992	-2.3088	0.0209548	0.236583	calcium and integrin binding 1
ENSG00000134874	DZIP1	41.4909	-1.73312	0.750687	-2.30871	0.0209595	0.236583	DAZ interacting zinc finger protein 1
NA	MTRNR2L2	90.6431	1.2668	0.549128	2.30694	0.0210583	0.237355	MT-RNR2 like 2 (pseudogene)
ENSG00000167393	PPP2R3B	5.62094	5.61758	2.43536	2.30667	0.0210732	0.237355	protein phosphatase 2 regulatory subunit B''beta
ENSG00000203930	LINC00632	21.7761	2.41594	1.04751	2.30637	0.0210899	0.237355	long intergenic non-protein coding RNA 632
ENSG00000135686	KLHL36	710.423	0.680585	0.295141	2.30596	0.0211127	0.237355	kelch like family member 36
ENSG00000100554	ATP6V1D	2111.72	0.561714	0.243616	2.30574	0.0211253	0.237355	ATPase H+ transporting V1 subunit D
ENSG00000146842	TMEM209	623.795	0.732166	0.317562	2.30559	0.0211338	0.237355	transmembrane protein 209
ENSG00000152601	MBNL1	7734.43	0.536535	0.232729	2.30541	0.0211439	0.237355	muscleblind like splicing regulator 1
ENSG00000131016	AKAP12	1287.95	-0.878957	0.381327	-2.305	0.0211668	0.237426	A-kinase anchoring protein 12
ENSG00000051128	HOMER3	1213.84	0.592402	0.257173	2.30352	0.0212497	0.23817	homer scaffold protein 3
ENSG00000106524	ANKMY2	566.934	0.670919	0.29148	2.30177	0.0213481	0.239086	ankyrin repeat and MYND domain containing 2
ENSG00000075914	EXOSC7	508.945	-0.711919	0.309706	-2.2987	0.0215222	0.24077	exosome component 7
ENSG00000187097	ENTPD5	352.837	-0.781901	0.340176	-2.29852	0.0215322	0.24077	ectonucleoside triphosphate diphosphohydrolase 5 (inactive)
ENSG00000196943	NOP9	308.022	-0.762771	0.331923	-2.29804	0.0215596	0.240889	NOP9 nucleolar protein
ENSG00000283759	MIR614	91.7893	-1.17667	0.512311	-2.29679	0.0216306	0.241494	microRNA 614
ENSG00000132692	BCAN	22.3574	2.37899	1.03653	2.29515	0.0217244	0.242297	brevican
ENSG00000140577	CRTC3	293.689	-0.809527	0.352818	-2.29446	0.0217642	0.242297	CREB regulated transcription coactivator 3
ENSG00000145901	TNIP1	3706.66	-0.615683	0.268364	-2.29421	0.0217787	0.242297	TNFAIP3 interacting protein 1
ENSG00000144868	TMEM108	20.4587	-2.8956	1.26219	-2.29411	0.0217839	0.242297	transmembrane protein 108
ENSG00000100906	NFKBIA	1061.44	-0.607633	0.264873	-2.29406	0.0217871	0.242297	NFKB inhibitor alpha
ENSG00000132963	POMP	3175.12	0.541492	0.23619	2.29261	0.0218706	0.242948	proteasome maturation protein
ENSG00000109062	NHERF1	959.608	0.609436	0.26585	2.29241	0.0218823	0.242948	NHERF family PDZ scaffold protein 1
ENSG00000116771	AGMAT	39.1265	-1.74648	0.762026	-2.29189	0.0219123	0.242948	agmatinase
ENSG00000120685	PROSER1	845.82	0.646575	0.282118	2.29186	0.0219135	0.242948	proline and serine rich 1
ENSG00000154274	C4orf19	214.481	1.12074	0.489458	2.28976	0.0220353	0.24396	chromosome 4 open reading frame 19
ENSG00000148690	FRA10AC1	730.385	0.641349	0.280102	2.2897	0.0220388	0.24396	FRA10A associated CGG repeat 1
ENSG00000023516	AKAP11	1445.31	0.601159	0.262617	2.28911	0.022073	0.244149	A-kinase anchoring protein 11
ENSG00000133134	BEX2	6.80021	-5.0445	2.2043	-2.28849	0.0221092	0.244361	brain expressed X-linked 2
ENSG00000114446	IFT57	588.19	0.651006	0.284657	2.28698	0.0221969	0.245141	intraflagellar transport 57
ENSG00000132153	DHX30	1579.77	-0.700193	0.306246	-2.28637	0.0222325	0.245345	DExH-box helicase 30
ENSG00000168765	GSTM4	339.453	0.791782	0.346393	2.28579	0.0222666	0.245532	glutathione S-transferase mu 4
ENSG00000161847	RAVER1	2082.99	-0.660081	0.288844	-2.28525	0.0222983	0.245692	ribonucleoprotein	PTB binding 1
ENSG00000126001	CEP250	1807.22	-0.576526	0.25232	-2.2849	0.0223185	0.245727	centrosomal protein 250
ENSG00000112695	COX7A2	1644.72	-0.557916	0.244607	-2.28086	0.0225566	0.248158	cytochrome c oxidase subunit 7A2
ENSG00000235652	EPM2A-DT	5.35121	5.54733	2.43298	2.28006	0.0226044	0.248493	EPM2A divergent transcript
ENSG00000159792	PSKH1	291.995	0.771986	0.338626	2.27976	0.0226221	0.248496	protein serine kinase H1
ENSG00000179820	MYADM	2764.62	-0.575693	0.252589	-2.27917	0.0226569	0.248626	myeloid associated differentiation marker
ENSG00000129055	ANAPC13	1042	0.636515	0.279299	2.27897	0.0226686	0.248626	anaphase promoting complex subunit 13
ENSG00000121207	LRAT	56.9001	1.48633	0.652466	2.27802	0.0227254	0.249058	lecithin retinol acyltransferase
ENSG00000160796	NBEAL2	317.291	-0.926917	0.407056	-2.27712	0.0227789	0.249155	neurobeachin like 2
ENSG00000008324	SS18L2	364.434	-0.729084	0.320183	-2.27708	0.0227812	0.249155	SS18 like 2
ENSG00000167528	ZNF641	79.0797	-1.23144	0.54082	-2.277	0.0227864	0.249155	zinc finger protein 641
ENSG00000187800	PEAR1	470.419	0.781558	0.343359	2.27621	0.0228331	0.249186	platelet endothelial aggregation receptor 1
ENSG00000132749	TESMIN	69.5294	-1.35106	0.593561	-2.27619	0.0228348	0.249186	testis expressed metallothionein like protein
ENSG00000135549	PKIB	93.8223	1.1681	0.51321	2.27608	0.0228415	0.249186	cAMP-dependent protein kinase inhibitor beta
ENSG00000186187	ZNRF1	610.24	0.72804	0.320024	2.27496	0.0229084	0.249726	zinc and ring finger 1
ENSG00000091317	CMTM6	1922.88	-0.553223	0.243233	-2.27445	0.0229387	0.249866	CKLF like MARVEL transmembrane domain containing 6
ENSG00000166747	AP1G1	1970.02	0.593044	0.260841	2.27358	0.0229913	0.250248	adaptor related protein complex 1 subunit gamma 1
ENSG00000159176	CSRP1	4094.26	0.643123	0.28294	2.273	0.0230262	0.250438	cysteine and glycine rich protein 1
ENSG00000178531	CTXN1	366.231	-0.798782	0.351683	-2.27131	0.0231281	0.251333	cortexin 1
ENSG00000288825	H2AC18	5.70658	-6.26517	2.75914	-2.2707	0.0231653	0.251333	H2A clustered histone 18
ENSG00000164744	SUN3	62.0525	1.52492	0.671678	2.27032	0.0231881	0.251333	Sad1 and UNC84 domain containing 3
ENSG00000047579	DTNBP1	591.175	-0.664207	0.292561	-2.27032	0.0231883	0.251333	dystrobrevin binding protein 1
ENSG00000141068	KSR1	87.033	-1.37756	0.606881	-2.26991	0.0232131	0.251333	kinase suppressor of ras 1
ENSG00000124766	SOX4	319.56	-3.08879	1.36077	-2.26989	0.0232142	0.251333	SRY-box transcription factor 4
ENSG00000135503	ACVR1B	164.769	-0.973027	0.42872	-2.26961	0.0232313	0.251333	activin A receptor type 1B
ENSG00000242372	EIF6	5722.67	-0.608521	0.268184	-2.26904	0.0232656	0.2514	eukaryotic translation initiation factor 6
ENSG00000102781	KATNAL1	685.538	0.62858	0.277038	2.26893	0.0232725	0.2514	katanin catalytic subunit A1 like 1
ENSG00000172594	SMPDL3A	131.565	-1.16093	0.511877	-2.26797	0.0233308	0.251839	sphingomyelin phosphodiesterase acid like 3A
ENSG00000185344	ATP6V0A2	873.776	-0.636583	0.28074	-2.26751	0.0233589	0.251952	ATPase H+ transporting V0 subunit a2
ENSG00000136943	CTSV	120.955	1.05491	0.465652	2.26546	0.0234848	0.253012	cathepsin V
ENSG00000008838	MED24	1014.34	-0.584834	0.258202	-2.26502	0.0235115	0.253012	mediator complex subunit 24
ENSG00000114316	USP4	983.563	-0.67407	0.297642	-2.2647	0.0235309	0.253012	ubiquitin specific peptidase 4
ENSG00000136997	MYC	3700.96	-0.626599	0.276696	-2.26457	0.0235389	0.253012	MYC proto-oncogene	bHLH transcription factor
ENSG00000156261	CCT8	7091.06	0.561978	0.248173	2.26447	0.0235455	0.253012	chaperonin containing TCP1 subunit 8
ENSG00000164053	ATRIP	249.905	-0.85526	0.377922	-2.26306	0.023632	0.253751	ATR interacting protein
ENSG00000085998	POMGNT1	1079.62	-0.579192	0.256058	-2.26196	0.0236999	0.25429	protein O-linked mannose N-acetylglucosaminyltransferase 1 (beta 1	2-)
ENSG00000149582	TMEM25	185.405	-0.924413	0.408746	-2.26158	0.0237232	0.254349	transmembrane protein 25
ENSG00000138193	PLCE1	415.442	0.748041	0.330817	2.26119	0.0237473	0.254417	phospholipase C epsilon 1
ENSG00000172939	OXSR1	3319.18	-0.532034	0.235362	-2.26049	0.0237906	0.254691	oxidative stress responsive kinase 1
ENSG00000130707	ASS1	113.909	1.35494	0.599723	2.25928	0.0238663	0.255159	argininosuccinate synthase 1
ENSG00000163714	U2SURP	3582.82	0.546565	0.241927	2.25922	0.02387	0.255159	U2 snRNP associated SURP domain containing
ENSG00000112812	PRSS16	21.1884	-2.52758	1.119	-2.25878	0.0238971	0.255258	serine protease 16
ENSG00000198453	ZNF568	123.529	1.05844	0.468742	2.25804	0.0239435	0.255311	zinc finger protein 568
ENSG00000164124	TMEM144	60.0772	1.39714	0.618757	2.25797	0.0239475	0.255311	transmembrane protein 144
ENSG00000187994	RINL	15.5578	2.88269	1.27676	2.25781	0.0239576	0.255311	Ras and Rab interactor like
ENSG00000167202	TBC1D2B	554.214	-0.653382	0.28942	-2.25756	0.0239733	0.255311	TBC1 domain family member 2B
ENSG00000163634	THOC7	1139.37	-0.599549	0.26564	-2.257	0.0240083	0.255494	THO complex subunit 7
ENSG00000115758	ODC1	6872.38	-0.814658	0.36103	-2.25648	0.0240403	0.255645	ornithine decarboxylase 1
ENSG00000180376	CCDC66	331.797	-0.744743	0.330107	-2.25607	0.0240663	0.255731	coiled-coil domain containing 66
ENSG00000240891	PLCXD2	79.6033	1.26324	0.560354	2.25437	0.024173	0.256674	phosphatidylinositol specific phospholipase C X domain containing 2
ENSG00000109854	HTATIP2	627.562	0.634527	0.281564	2.25358	0.0242226	0.257011	HIV-1 Tat interactive protein 2
ENSG00000134709	HOOK1	25.8578	2.28651	1.01524	2.25218	0.0243107	0.257754	hook microtubule tethering protein 1
ENSG00000133112	TPT1	17480.4	0.501545	0.22279	2.2512	0.0243731	0.258225	tumor protein	translationally-controlled 1
ENSG00000164743	C8orf48	52.9499	1.50449	0.668454	2.25069	0.0244049	0.258371	chromosome 8 open reading frame 48
ENSG00000103196	CRISPLD2	40.2008	1.79792	0.798955	2.25034	0.0244277	0.258421	cysteine rich secretory protein LCCL domain containing 2
ENSG00000172269	DPAGT1	653.751	-0.63259	0.281249	-2.24922	0.0244984	0.258609	dolichyl-phosphate N-acetylglucosaminephosphotransferase 1
ENSG00000115295	CLIP4	1548.95	0.645179	0.286854	2.24915	0.0245028	0.258609	CAP-Gly domain containing linker protein family member 4
ENSG00000109511	ANXA10	8.09885	-4.30728	1.91516	-2.24904	0.0245102	0.258609	annexin A10
ENSG00000040531	CTNS	207.746	-0.891839	0.396563	-2.24892	0.0245176	0.258609	cystinosin	lysosomal cystine transporter
ENSG00000167232	ZNF91	472.278	0.679687	0.302481	2.24704	0.0246377	0.259684	zinc finger protein 91
ENSG00000127870	RNF6	1263.54	0.657664	0.292986	2.2447	0.0247877	0.260907	ring finger protein 6
ENSG00000160862	AZGP1	7.87261	-4.25319	1.89481	-2.24466	0.0247902	0.260907	alpha-2-glycoprotein 1	zinc-binding
ENSG00000167920	KRT10-AS1	378.199	0.710078	0.316508	2.24348	0.0248662	0.261515	KRT10 antisense RNA 1
ENSG00000153292	ADGRF1	15.1966	-3.11371	1.38818	-2.24302	0.0248955	0.261518	adhesion G protein-coupled receptor F1
ENSG00000126752	SSX1	9.39944	-3.85744	1.71986	-2.24289	0.0249041	0.261518	SSX family member 1
ENSG00000131669	NINJ1	188.745	0.900349	0.401472	2.24262	0.0249213	0.261518	ninjurin 1
ENSG00000213468	FIRRE	11.7503	-3.12676	1.39597	-2.23985	0.0251004	0.263205	firre intergenic repeating RNA element
ENSG00000125384	PTGER2	21.7484	2.40902	1.07577	2.23934	0.0251337	0.263362	prostaglandin E receptor 2
ENSG00000157216	SSBP3	521.164	0.723306	0.323095	2.23868	0.0251768	0.26359	single stranded DNA binding protein 3
ENSG00000163527	STT3B	4167.63	-0.516708	0.230842	-2.23836	0.0251976	0.26359	STT3 oligosaccharyltransferase complex catalytic subunit B
ENSG00000179361	ARID3B	169.025	-0.919101	0.410658	-2.23812	0.0252132	0.26359	AT-rich interaction domain 3B
ENSG00000125901	MRPS26	809.105	-0.675413	0.30181	-2.23788	0.0252291	0.26359	mitochondrial ribosomal protein S26
ENSG00000136378	ADAMTS7	5.16928	5.49725	2.45712	2.23727	0.0252686	0.263788	ADAM metallopeptidase with thrombospondin type 1 motif 7
ENSG00000103035	PSMD7	2352.18	0.609104	0.272329	2.23665	0.0253093	0.263788	proteasome 26S subunit	non-ATPase 7
ENSG00000137275	RIPK1	927.844	-0.734901	0.328575	-2.23663	0.0253106	0.263788	receptor interacting serine/threonine kinase 1
ENSG00000188100	FAM25A	5.18953	5.50267	2.46044	2.23646	0.0253217	0.263788	family with sequence similarity 25 member A
ENSG00000072571	HMMR	440.098	0.688171	0.307923	2.23488	0.025425	0.264627	hyaluronan mediated motility receptor
ENSG00000128408	RIBC2	23.5382	2.33283	1.04393	2.23467	0.0254392	0.264627	RIB43A domain with coiled-coils 2
ENSG00000170248	PDCD6IP	4283.63	-0.513678	0.230101	-2.2324	0.0255886	0.265988	programmed cell death 6 interacting protein
ENSG00000187720	THSD4	1186.1	-0.575757	0.257975	-2.23183	0.0256262	0.266004	thrombospondin type 1 domain containing 4
ENSG00000144893	MED12L	65.6733	1.42832	0.639981	2.23181	0.0256273	0.266004	mediator complex subunit 12L
ENSG00000074603	DPP8	1036.67	-0.614865	0.275625	-2.2308	0.0256944	0.266507	dipeptidyl peptidase 8
ENSG00000176101	SSNA1	980.045	-0.657694	0.294884	-2.23035	0.0257242	0.266568	SS nuclear autoantigen 1
ENSG00000131018	SYNE1	645.33	0.71191	0.31922	2.23015	0.0257375	0.266568	spectrin repeat containing nuclear envelope protein 1
ENSG00000169826	CSGALNACT2	2075.34	0.536996	0.240846	2.22963	0.0257722	0.266729	chondroitin sulfate N-acetylgalactosaminyltransferase 2
ENSG00000174871	CNIH2	35.2722	1.82996	0.820849	2.22935	0.0257903	0.266729	cornichon family AMPA receptor auxiliary protein 2
ENSG00000135931	ARMC9	406.13	0.743274	0.333492	2.22876	0.0258298	0.266946	armadillo repeat containing 9
ENSG00000141556	TBCD	1042.51	-0.604334	0.27129	-2.22763	0.025905	0.267451	tubulin folding cofactor D
ENSG00000076248	UNG	2158.24	-0.598152	0.268535	-2.22747	0.0259161	0.267451	uracil DNA glycosylase
ENSG00000140400	MAN2C1	341.575	-0.860551	0.3864	-2.2271	0.0259406	0.267511	mannosidase alpha class 2C member 1
ENSG00000130303	BST2	2561.19	0.570043	0.256	2.22673	0.0259653	0.267573	bone marrow stromal cell antigen 2
ENSG00000100196	KDELR3	373.532	0.829996	0.372844	2.22612	0.0260058	0.267798	KDEL endoplasmic reticulum protein retention receptor 3
ENSG00000197646	PDCD1LG2	64.0442	-1.32969	0.597536	-2.22529	0.0260615	0.26802	programmed cell death 1 ligand 2
ENSG00000162407	PLPP3	593.324	0.81214	0.364967	2.22525	0.0260647	0.26802	phospholipid phosphatase 3
ENSG00000136854	STXBP1	857.273	0.588833	0.265164	2.22064	0.0263754	0.27102	syntaxin binding protein 1
ENSG00000132196	HSD17B7	195.159	0.86852	0.391201	2.22014	0.0264096	0.271176	hydroxysteroid 17-beta dehydrogenase 7
ENSG00000148399	DPH7	522.481	-0.692508	0.312247	-2.21782	0.0265672	0.272599	diphthamide biosynthesis 7
ENSG00000135638	EMX1	13.0346	-2.85616	1.2887	-2.21631	0.0266703	0.273461	empty spiracles homeobox 1
ENSG00000197548	ATG7	222.989	-0.84892	0.383197	-2.21536	0.0267353	0.273795	autophagy related 7
ENSG00000124713	GNMT	114.185	-1.05736	0.477335	-2.21513	0.0267509	0.273795	glycine N-methyltransferase
ENSG00000074370	ATP2A3	5.13551	5.48817	2.47773	2.215	0.0267602	0.273795	ATPase sarcoplasmic/endoplasmic reticulum Ca2+ transporting 3
ENSG00000099282	TSPAN15	243.22	0.890196	0.40207	2.21403	0.0268265	0.274278	tetraspanin 15
ENSG00000198824	CHAMP1	1148.84	0.712114	0.321686	2.21369	0.0268501	0.274323	chromosome alignment maintaining phosphoprotein 1
ENSG00000082701	GSK3B	1786.56	0.568098	0.256842	2.21186	0.0269763	0.275339	glycogen synthase kinase 3 beta
ENSG00000232803	SLCO4A1-AS1	71.4122	1.62066	0.732771	2.21169	0.026988	0.275339	SLCO4A1 antisense RNA 1
ENSG00000157399	ARSL	26.2276	2.07084	0.936449	2.21137	0.02701	0.275367	arylsulfatase L
ENSG00000198646	NCOA6	1346.88	-0.564011	0.25547	-2.20774	0.0272625	0.277704	nuclear receptor coactivator 6
ENSG00000115306	SPTBN1	9542	-0.56197	0.254571	-2.20752	0.027278	0.277704	spectrin beta	non-erythrocytic 1
ENSG00000125107	CNOT1	3422.85	0.52984	0.240422	2.20379	0.0275392	0.280165	CCR4-NOT transcription complex subunit 1
ENSG00000102786	INTS6	756.777	0.728167	0.330545	2.20292	0.0276	0.280429	integrator complex subunit 6
ENSG00000145882	PCYOX1L	165.46	1.1221	0.509384	2.20286	0.0276044	0.280429	prenylcysteine oxidase 1 like
ENSG00000163159	VPS72	805.248	-0.636807	0.289163	-2.20224	0.0276485	0.280678	vacuolar protein sorting 72 homolog
ENSG00000163507	CIP2A	2653.2	0.575342	0.261344	2.20147	0.0277025	0.281028	cellular inhibitor of PP2A
ENSG00000171223	JUNB	1020.49	0.633711	0.288161	2.19916	0.0278667	0.282493	JunB proto-oncogene	AP-1 transcription factor subunit
ENSG00000143341	HMCN1	57.3621	1.38489	0.630076	2.19798	0.0279507	0.283038	hemicentin 1
ENSG00000067066	SP100	1343.9	0.571845	0.260184	2.19785	0.02796	0.283038	SP100 nuclear antigen
ENSG00000189067	LITAF	1024.81	-0.583604	0.265705	-2.19643	0.0280608	0.283858	lipopolysaccharide induced TNF factor
ENSG00000165084	C8orf34	13.9287	2.92904	1.33391	2.19583	0.0281038	0.283916	chromosome 8 open reading frame 34
ENSG00000083896	YTHDC1	141.009	1.16909	0.53242	2.1958	0.0281062	0.283916	YTH N6-methyladenosine RNA binding protein C1
ENSG00000196967	ZNF585A	176.289	0.895499	0.40799	2.19491	0.0281703	0.284363	zinc finger protein 585A
ENSG00000124496	TRERF1	1077.42	-0.677357	0.308711	-2.19414	0.028225	0.284701	transcriptional regulating factor 1
ENSG00000172164	SNTB1	245.967	-0.816336	0.372175	-2.19342	0.0282771	0.284701	syntrophin beta 1
ENSG00000136295	TTYH3	1313.22	0.654757	0.298577	2.19292	0.0283131	0.284701	tweety family member 3
NA	PRKXP1	88.2485	-1.31294	0.59877	-2.19273	0.0283268	0.284701	PRKX pseudogene 1
ENSG00000178662	CSRNP3	41.527	1.64453	0.750033	2.19261	0.0283355	0.284701	cysteine and serine rich nuclear protein 3
ENSG00000138078	PREPL	1012.28	0.599065	0.273234	2.19249	0.0283439	0.284701	prolyl endopeptidase like
ENSG00000139915	MDGA2	46.6581	1.59943	0.729576	2.19228	0.0283593	0.284701	MAM domain containing glycosylphosphatidylinositol anchor 2
ENSG00000172828	CES3	13.9934	-3.42183	1.56095	-2.19214	0.0283694	0.284701	carboxylesterase 3
ENSG00000186281	GPAT2	391.399	0.811152	0.370058	2.19196	0.0283827	0.284701	glycerol-3-phosphate acyltransferase 2	mitochondrial
ENSG00000104853	CLPTM1	2006.6	-0.613212	0.279794	-2.19166	0.0284042	0.284718	CLPTM1 regulator of GABA type A receptor forward trafficking
ENSG00000178235	SLITRK1	428.122	0.750416	0.342593	2.1904	0.0284952	0.28543	SLIT and NTRK like family member 1
ENSG00000066923	STAG3	5.29719	5.5332	2.52658	2.18999	0.0285247	0.285526	stromal antigen 3
ENSG00000152784	PRDM8	998.311	0.695071	0.317545	2.18889	0.0286047	0.286127	PR/SET domain 8
ENSG00000088247	KHSRP	8410.46	-0.592121	0.270585	-2.1883	0.0286479	0.286359	KH-type splicing regulatory protein
ENSG00000071994	PDCD2	1166.44	-0.557747	0.254977	-2.18744	0.0287104	0.286784	programmed cell death 2
ENSG00000115275	MOGS	1215.3	-0.565935	0.258825	-2.18655	0.0287753	0.286877	mannosyl-oligosaccharide glucosidase
ENSG00000069345	DNAJA2	1781.99	0.571938	0.261598	2.18632	0.0287919	0.286877	DnaJ heat shock protein family (Hsp40) member A2
ENSG00000198626	RYR2	26.9195	-1.93797	0.886419	-2.18629	0.0287947	0.286877	ryanodine receptor 2
ENSG00000121753	ADGRB2	21.5345	2.57769	1.17909	2.18617	0.0288033	0.286877	adhesion G protein-coupled receptor B2
ENSG00000108551	RASD1	308.231	1.05711	0.483652	2.18568	0.0288392	0.286877	ras related dexamethasone induced 1
ENSG00000163626	COX18	414.05	-0.730673	0.334302	-2.18567	0.0288399	0.286877	cytochrome c oxidase assembly factor COX18
ENSG00000146350	TBC1D32	72.6975	1.34942	0.617522	2.18521	0.0288731	0.287008	TBC1 domain family member 32
ENSG00000100583	SAMD15	11.3133	-3.06991	1.40507	-2.18487	0.0288982	0.287058	sterile alpha motif domain containing 15
ENSG00000182197	EXT1	5057.29	-0.620628	0.284143	-2.18421	0.0289467	0.287132	exostosin glycosyltransferase 1
ENSG00000178038	ALS2CL	174.635	-0.951166	0.435515	-2.184	0.028962	0.287132	ALS2 C-terminal like
ENSG00000205002	AARD	69.133	1.35488	0.620381	2.18395	0.0289658	0.287132	alanine and arginine rich domain containing protein
ENSG00000178718	RPP25	639.313	-0.833064	0.381842	-2.1817	0.0291316	0.288576	ribonuclease P and MRP subunit p25
ENSG00000197961	ZNF121	419.242	-0.67457	0.30935	-2.18061	0.0292125	0.28886	zinc finger protein 121
ENSG00000102109	PCSK1N	81.7244	1.18377	0.542887	2.18051	0.0292199	0.28886	proprotein convertase subtilisin/kexin type 1 inhibitor
ENSG00000116396	KCNC4	20.504	-2.25857	1.03581	-2.1805	0.0292207	0.28886	potassium voltage-gated channel subfamily C member 4
ENSG00000204291	COL15A1	11.7324	3.4285	1.57303	2.17954	0.0292912	0.289324	collagen type XV alpha 1 chain
ENSG00000051341	POLQ	466.151	0.654294	0.300229	2.17932	0.0293081	0.289324	DNA polymerase theta
ENSG00000175445	LPL	12.6552	-3.24879	1.49095	-2.17901	0.029331	0.289351	lipoprotein lipase
ENSG00000148834	GSTO1	5161.17	0.531201	0.243851	2.17839	0.0293773	0.289608	glutathione S-transferase omega 1
ENSG00000107819	SFXN3	3659.76	0.596686	0.274008	2.17763	0.0294339	0.289966	sideroflexin 3
ENSG00000065882	TBC1D1	1092.97	0.616725	0.28327	2.17716	0.0294687	0.29011	TBC1 domain family member 1
ENSG00000123384	LRP1	1195.4	0.930668	0.427544	2.17678	0.0294972	0.290191	LDL receptor related protein 1
ENSG00000184117	NIPSNAP1	734.112	0.622122	0.285916	2.17589	0.0295632	0.29064	nipsnap homolog 1
ENSG00000127948	POR	312.368	-0.771495	0.354649	-2.17538	0.0296017	0.29082	cytochrome p450 oxidoreductase
ENSG00000145284	SCD5	670.413	0.639711	0.294186	2.17451	0.0296666	0.291061	stearoyl-CoA desaturase 5
ENSG00000146242	TPBG	789.959	-0.650512	0.299166	-2.17442	0.0296739	0.291061	trophoblast glycoprotein
ENSG00000125246	CLYBL	34.6365	1.85876	0.854903	2.17424	0.0296873	0.291061	citramalyl-CoA lyase
ENSG00000146386	ABRACL	686.726	0.628179	0.288985	2.17374	0.0297246	0.291228	ABRA C-terminal like
ENSG00000043039	BARX2	36.0014	1.80919	0.832402	2.17346	0.0297456	0.291234	BARX homeobox 2
ENSG00000126216	TUBGCP3	834.567	0.787831	0.362577	2.17287	0.0297903	0.291473	tubulin gamma complex associated protein 3
ENSG00000136381	IREB2	1231.31	-0.554016	0.255217	-2.17076	0.029949	0.292825	iron responsive element binding protein 2
ENSG00000198573	SPANXC	17.1548	2.51509	1.15896	2.17013	0.0299972	0.293097	SPANX family member C
ENSG00000163684	RPP14	481.012	-0.692314	0.319092	-2.16964	0.0300345	0.293168	ribonuclease P/MRP subunit p14
ENSG00000151715	TMEM45B	10.0213	-3.55638	1.63927	-2.16949	0.0300454	0.293168	transmembrane protein 45B
ENSG00000244509	APOBEC3C	200.548	0.856142	0.394742	2.16887	0.0300928	0.293278	apolipoprotein B mRNA editing enzyme catalytic subunit 3C
ENSG00000133216	EPHB2	1064.02	-0.592884	0.273369	-2.1688	0.0300976	0.293278	EPH receptor B2
ENSG00000145912	NHP2	2008.23	-0.603041	0.278193	-2.16771	0.0301809	0.293889	NHP2 ribonucleoprotein
ENSG00000243477	NAA80	95.2472	-1.13092	0.521869	-2.16706	0.0302303	0.29417	N-alpha-acetyltransferase 80	NatH catalytic subunit
ENSG00000072858	SIDT1	36.064	1.73495	0.80107	2.16579	0.030327	0.294911	SID1 transmembrane family member 1
ENSG00000157349	DDX19B	409.289	0.738123	0.34092	2.16509	0.0303807	0.295051	DEAD-box helicase 19B
ENSG00000165629	ATP5F1C	3194.08	0.505266	0.233411	2.1647	0.0304104	0.295051	ATP synthase F1 subunit gamma
ENSG00000124145	SDC4	5024.23	-0.513167	0.237105	-2.1643	0.0304411	0.295051	syndecan 4
ENSG00000137818	RPLP1	18208.5	-0.49797	0.23009	-2.16424	0.0304461	0.295051	ribosomal protein lateral stalk subunit P1
ENSG00000186642	PDE2A	230.98	3.45353	1.59585	2.16407	0.0304591	0.295051	phosphodiesterase 2A
ENSG00000277631	PGM5P3-AS1	39.7905	-1.94231	0.897561	-2.16399	0.030465	0.295051	PGM5P3 antisense RNA 1
ENSG00000267041	ZNF850	417.44	-0.712526	0.329364	-2.16334	0.030515	0.295336	zinc finger protein 850
ENSG00000137221	TJAP1	955.16	-0.588098	0.271918	-2.16278	0.0305584	0.295556	tight junction associated protein 1
ENSG00000067560	RHOA	10303.2	-0.525682	0.24315	-2.16196	0.0306211	0.295655	ras homolog family member A
ENSG00000166224	SGPL1	549.186	-0.648966	0.300175	-2.16196	0.0306215	0.295655	sphingosine-1-phosphate lyase 1
ENSG00000213417	KRTAP2-4	11.1351	-4.11606	1.90424	-2.16152	0.0306548	0.295655	keratin associated protein 2-4
ENSG00000215712	TMEM242	216.621	-0.818622	0.378737	-2.16145	0.0306605	0.295655	transmembrane protein 242
ENSG00000233276	GPX1	4433.82	-0.575913	0.266466	-2.1613	0.0306718	0.295655	glutathione peroxidase 1
ENSG00000123685	BATF3	127.411	-1.1123	0.514728	-2.16096	0.0306988	0.295716	basic leucine zipper ATF-like transcription factor 3
ENSG00000167767	KRT80	1311.56	0.557085	0.257935	2.15979	0.0307892	0.296387	keratin 80
NA	HSD3BP4	7.43172	-4.16421	1.92959	-2.15808	0.0309219	0.296942	hydroxy-delta-5-steroid dehydrogenase	3 beta	pseudogene 4
ENSG00000291110	TRIM16L	284.161	0.811875	0.376205	2.15806	0.0309229	0.296942	tripartite motif containing 16 like
ENSG00000143845	ETNK2	284.543	0.742126	0.343906	2.15793	0.0309333	0.296942	ethanolamine kinase 2
ENSG00000124608	AARS2	311.248	-0.723348	0.33525	-2.15764	0.030956	0.296942	alanyl-tRNA synthetase 2	mitochondrial
ENSG00000167333	TRIM68	226.237	0.798455	0.37008	2.15752	0.0309654	0.296942	tripartite motif containing 68
ENSG00000133195	SLC39A11	151.904	0.92387	0.428234	2.1574	0.0309748	0.296942	solute carrier family 39 member 11
ENSG00000186472	PCLO	150.937	-0.912535	0.423056	-2.15701	0.0310052	0.296942	piccolo presynaptic cytomatrix protein
ENSG00000107104	KANK1	222.2	-0.80488	0.373191	-2.15675	0.0310251	0.296942	KN motif and ankyrin repeat domains 1
ENSG00000110931	CAMKK2	917.824	-0.575157	0.266691	-2.15664	0.0310334	0.296942	calcium/calmodulin dependent protein kinase kinase 2
ENSG00000114416	FXR1	6624.76	0.499121	0.231465	2.15635	0.0310561	0.296961	FMR1 autosomal homolog 1
ENSG00000146250	PRSS35	12.1158	3.10089	1.43852	2.1556	0.0311146	0.297153	serine protease 35
ENSG00000150510	FAM124A	16.8583	-2.46557	1.14388	-2.15544	0.0311274	0.297153	family with sequence similarity 124 member A
ENSG00000180357	ZNF609	721.936	-0.597704	0.277318	-2.1553	0.0311384	0.297153	zinc finger protein 609
ENSG00000114107	CEP70	463.199	0.682399	0.316785	2.15414	0.0312295	0.297824	centrosomal protein 70
ENSG00000155380	SLC16A1	10.1872	3.40277	1.58045	2.15304	0.0313153	0.298443	solute carrier family 16 member 1
ENSG00000120694	HSPH1	4588	0.558218	0.25934	2.15246	0.0313611	0.298569	heat shock protein family H (Hsp110) member 1
ENSG00000144659	SLC25A38	518.449	-0.777999	0.361466	-2.15235	0.0313702	0.298569	solute carrier family 25 member 38
ENSG00000139687	RB1	1955.88	0.518261	0.24088	2.15153	0.0314342	0.29898	RB transcriptional corepressor 1
ENSG00000122034	GTF3A	1390.38	0.538141	0.250169	2.15111	0.0314672	0.299095	general transcription factor IIIA
ENSG00000163319	MRPS18C	387.12	0.68931	0.320521	2.15059	0.0315086	0.29929	mitochondrial ribosomal protein S18C
ENSG00000106804	C5	86.365	1.14217	0.531788	2.14779	0.0317303	0.30106	complement C5
ENSG00000102710	SUPT20H	860.772	0.569192	0.265023	2.14771	0.031737	0.30106	SPT20 homolog	SAGA complex component
ENSG00000160408	ST6GALNAC6	618.461	-0.616694	0.28731	-2.14644	0.0318379	0.301783	ST6 N-acetylgalactosaminide alpha-2	6-sialyltransferase 6
ENSG00000166816	LDHD	59.3579	1.39998	0.652302	2.14622	0.0318553	0.301783	lactate dehydrogenase D
ENSG00000120662	MTRF1	229.13	0.860239	0.400908	2.14573	0.0318948	0.301941	mitochondrial translation release factor 1
ENSG00000092108	SCFD1	1475.36	0.556103	0.259247	2.14507	0.0319474	0.301941	sec1 family domain containing 1
ENSG00000163993	S100P	11.3424	3.35319	1.56333	2.14491	0.0319602	0.301941	S100 calcium binding protein P
ENSG00000171604	CXXC5	230.185	1.03452	0.482337	2.1448	0.0319689	0.301941	CXXC finger protein 5
ENSG00000115524	SF3B1	6890.85	0.499403	0.232855	2.14469	0.0319774	0.301941	splicing factor 3b subunit 1
ENSG00000132821	VSTM2L	161.602	-1.12685	0.525623	-2.14384	0.0320454	0.302383	V-set and transmembrane domain containing 2 like
ENSG00000165724	ZMYND19	604.017	-0.695443	0.324468	-2.14333	0.0320865	0.302572	zinc finger MYND-type containing 19
ENSG00000154263	ABCA10	11.8393	3.06464	1.43049	2.14238	0.0321631	0.303027	ATP binding cassette subfamily A member 10
ENSG00000109686	SH3D19	674.273	-0.595755	0.278104	-2.1422	0.0321771	0.303027	SH3 domain containing 19
ENSG00000182621	PLCB1	164.871	1.21218	0.566158	2.14106	0.0322691	0.303694	phospholipase C beta 1
ENSG00000112078	KCTD20	4055.36	-0.490381	0.229148	-2.14001	0.0323536	0.304289	potassium channel tetramerization domain containing 20
ENSG00000100345	MYH9	26564.4	-0.48962	0.228822	-2.13974	0.0323754	0.304295	myosin heavy chain 9
ENSG00000242498	ARPIN	525.795	-0.653105	0.305354	-2.13884	0.0324485	0.304782	actin related protein 2/3 complex inhibitor
ENSG00000105401	CDC37	7511.92	-0.524298	0.245231	-2.13798	0.0325186	0.30524	cell division cycle 37	HSP90 cochaperone
ENSG00000100292	HMOX1	81.3634	1.15862	0.542104	2.13727	0.0325757	0.305576	heme oxygenase 1
ENSG00000159579	RSPRY1	622.41	0.704841	0.329893	2.13658	0.0326326	0.305909	ring finger and SPRY domain containing 1
ENSG00000090097	PCBP4	467.035	-0.668207	0.313028	-2.13465	0.0327894	0.307099	poly(rC) binding protein 4
ENSG00000163521	GLB1L	79.7856	1.24742	0.584408	2.13449	0.0328024	0.307099	galactosidase beta 1 like
ENSG00000184277	TM2D3	208.972	-0.799181	0.374493	-2.13403	0.03284	0.307191	TM2 domain containing 3
ENSG00000064225	ST3GAL6	363.574	-0.743887	0.348621	-2.1338	0.032859	0.307191	ST3 beta-galactoside alpha-2	3-sialyltransferase 6
ENSG00000090487	SPG21	1613	-0.533554	0.250136	-2.13306	0.03292	0.307191	SPG21 abhydrolase domain containing	maspardin
ENSG00000184432	COPB2	3289.11	0.505273	0.236919	2.13269	0.0329505	0.307191	COPI coat complex subunit beta 2
ENSG00000215417	MIR17HG	142.466	1.02856	0.482296	2.13263	0.0329555	0.307191	miR-17-92a-1 cluster host gene
ENSG00000140575	IQGAP1	9380.32	-0.491393	0.230424	-2.13256	0.0329611	0.307191	IQ motif containing GTPase activating protein 1
ENSG00000140526	ABHD2	1441.1	-0.534936	0.250844	-2.13254	0.0329623	0.307191	abhydrolase domain containing 2	acylglycerol lipase
ENSG00000198888	ND1	68577.6	0.508998	0.238746	2.13196	0.0330099	0.307434	NADH dehydrogenase subunit 1
ENSG00000106443	PHF14	983.529	-0.58187	0.273092	-2.13068	0.0331158	0.30822	PHD finger protein 14
ENSG00000142197	DOP1B	305.592	-0.736105	0.345552	-2.13023	0.0331527	0.308363	DOP1 leucine zipper like protein B
ENSG00000164187	LMBRD2	507.985	0.639591	0.300356	2.12944	0.0332175	0.308766	LMBR1 domain containing 2
ENSG00000143248	RGS5	193.672	0.905499	0.425858	2.12629	0.0334788	0.310673	regulator of G protein signaling 5
ENSG00000117707	PROX1	78.7404	1.52037	0.715055	2.12623	0.0334838	0.310673	prospero homeobox 1
ENSG00000070759	TESK2	96.4834	-1.10302	0.518812	-2.12604	0.0334996	0.310673	testis associated actin remodelling kinase 2
NA	NA	17.7083	-2.43013	1.14309	-2.12593	0.0335095	0.310673	NA
ENSG00000156587	UBE2L6	745.931	0.598378	0.281592	2.12498	0.0335879	0.311199	ubiquitin conjugating enzyme E2 L6
ENSG00000198420	TCAF1	593.662	0.639981	0.301241	2.12448	0.0336296	0.311384	TRPM8 channel associated factor 1
ENSG00000153064	BANK1	72.2262	-1.21629	0.572752	-2.12358	0.0337049	0.311879	B cell scaffold protein with ankyrin repeats 1
ENSG00000130590	SAMD10	217.275	-0.81778	0.385415	-2.12182	0.0338529	0.313047	sterile alpha motif domain containing 10
ENSG00000253309	SERPINE3	10.2595	3.66366	1.72748	2.12081	0.0339379	0.31363	serpin family E member 3
ENSG00000197355	UAP1L1	330.348	0.776516	0.366195	2.1205	0.033964	0.313669	UDP-N-acetylglucosamine pyrophosphorylase 1 like 1
ENSG00000118762	PKD2	652.602	0.610851	0.288174	2.11973	0.0340291	0.314067	polycystin 2	transient receptor potential cation channel
ENSG00000187713	TMEM203	574.672	-0.606564	0.286225	-2.11918	0.0340749	0.314288	transmembrane protein 203
ENSG00000147813	NAPRT	27.0976	-1.90246	0.897961	-2.11864	0.0341207	0.31435	nicotinate phosphoribosyltransferase
ENSG00000106701	FSD1L	235.085	-0.800443	0.37782	-2.11858	0.0341256	0.31435	fibronectin type III and SPRY domain containing 1 like
ENSG00000090470	PDCD7	638.218	-0.629652	0.297261	-2.11818	0.0341602	0.314467	programmed cell death 7
ENSG00000069998	HDHD5	408.135	-0.700501	0.33079	-2.11766	0.0342036	0.314664	haloacid dehalogenase like hydrolase domain containing 5
ENSG00000204394	VARS1	19.4787	-2.55767	1.20824	-2.11685	0.0342723	0.315085	valyl-tRNA synthetase 1
ENSG00000196743	GM2A	1165.08	0.545507	0.257727	2.11661	0.0342933	0.315085	ganglioside GM2 activator
ENSG00000179399	GPC5	11.0345	3.13307	1.48071	2.11592	0.0343514	0.315416	glypican 5
ENSG00000105483	CARD8	459.483	0.795808	0.37615	2.11566	0.0343734	0.315416	caspase recruitment domain family member 8
ENSG00000110871	COQ5	301.354	0.728494	0.344452	2.11494	0.0344351	0.31578	coenzyme Q5	methyltransferase
ENSG00000141013	GAS8	311.249	0.728052	0.344307	2.11454	0.0344691	0.315889	growth arrest specific 8
ENSG00000183496	MEX3B	36.4561	-1.62694	0.769606	-2.11399	0.0345157	0.316114	mex-3 RNA binding family member B
ENSG00000121897	LIAS	152.594	0.944413	0.446859	2.11345	0.0345625	0.316341	lipoic acid synthetase
ENSG00000165698	SPACA9	38.4873	1.71338	0.810865	2.11303	0.034598	0.316464	sperm acrosome associated 9
ENSG00000085552	IGSF9	6.14368	-4.9293	2.3337	-2.11223	0.0346669	0.316891	immunoglobulin superfamily member 9
ENSG00000112186	CAP2	919.632	-0.580212	0.274749	-2.11179	0.0347044	0.317032	cyclase associated actin cytoskeleton regulatory protein 2
ENSG00000085662	AKR1B1	1272.74	0.560316	0.265461	2.11073	0.0347957	0.317663	aldo-keto reductase family 1 member B
ENSG00000243244	STON1	55.6302	1.46155	0.692613	2.1102	0.034841	0.317725	stonin 1
ENSG00000108094	CUL2	1487.89	0.568806	0.269561	2.11012	0.0348482	0.317725	cullin 2
ENSG00000175229	GAL3ST3	43.6266	1.67451	0.793722	2.10969	0.0348846	0.317725	galactose-3-O-sulfotransferase 3
ENSG00000144848	ATG3	1457.09	0.527634	0.250109	2.10962	0.0348912	0.317725	autophagy related 3
ENSG00000163466	ARPC2	6891.23	0.491367	0.232968	2.10917	0.0349303	0.317879	actin related protein 2/3 complex subunit 2
ENSG00000140525	FANCI	1590.45	-0.519278	0.24627	-2.10857	0.0349816	0.318144	FA complementation group I
ENSG00000146109	ABT1	860.883	-0.684197	0.324628	-2.10764	0.0350625	0.318677	activator of basal transcription 1
ENSG00000165983	PTER	836.296	0.565629	0.268449	2.10703	0.0351151	0.318953	phosphotriesterase related
ENSG00000115677	HDLBP	9968.61	0.530632	0.251962	2.106	0.0352042	0.31956	high density lipoprotein binding protein
ENSG00000138829	FBN2	22.7292	2.08642	0.991953	2.10335	0.0354355	0.321322	fibrillin 2
ENSG00000143355	LHX9	41.31	-1.51443	0.720039	-2.10326	0.0354432	0.321322	LIM homeobox 9
ENSG00000196411	EPHB4	545.359	-0.611428	0.29085	-2.10221	0.035535	0.321951	EPH receptor B4
ENSG00000101842	VSIG1	15.3672	-2.44889	1.16506	-2.10194	0.0355586	0.321961	V-set and immunoglobulin domain containing 1
ENSG00000067064	IDI1	745.073	0.644219	0.306586	2.10127	0.0356173	0.32212	isopentenyl-diphosphate delta isomerase 1
ENSG00000160588	MPZL3	10.0329	-3.5748	1.70146	-2.10102	0.0356393	0.32212	myelin protein zero like 3
ENSG00000183250	LINC01547	31.2699	1.89937	0.9042	2.10061	0.0356749	0.32212	long intergenic non-protein coding RNA 1547
ENSG00000169855	ROBO1	551.09	-0.612418	0.291549	-2.10057	0.0356791	0.32212	roundabout guidance receptor 1
ENSG00000116711	PLA2G4A	121.785	0.964519	0.459237	2.10027	0.0357054	0.32212	phospholipase A2 group IVA
ENSG00000130165	ELOF1	968.577	-0.602341	0.286801	-2.1002	0.0357111	0.32212	elongation factor 1
ENSG00000161714	PLCD3	1350.82	0.577175	0.274868	2.09982	0.0357445	0.322218	phospholipase C delta 3
ENSG00000279170	TSTD3	33.6477	-1.69395	0.80704	-2.09897	0.0358198	0.322693	thiosulfate sulfurtransferase like domain containing 3
ENSG00000264364	DYNLL2	1240.83	-0.609248	0.290596	-2.09654	0.0360339	0.32418	dynein light chain LC8-type 2
ENSG00000166411	IDH3A	960.141	-0.563606	0.268848	-2.09638	0.0360489	0.32418	isocitrate dehydrogenase (NAD(+)) 3 catalytic subunit alpha
ENSG00000213190	MLLT11	127.627	0.958098	0.457035	2.09633	0.0360526	0.32418	MLLT11 transcription factor 7 cofactor
ENSG00000132604	TERF2	608.316	0.686071	0.327333	2.09594	0.0360875	0.324289	telomeric repeat binding factor 2
ENSG00000123095	BHLHE41	146.691	1.12505	0.536907	2.09542	0.0361334	0.324499	basic helix-loop-helix family member e41
ENSG00000166145	SPINT1	23.2871	-2.22489	1.06213	-2.09475	0.0361932	0.324831	serine peptidase inhibitor	Kunitz type 1
ENSG00000163743	RCHY1	620.453	0.594018	0.283741	2.09352	0.0363025	0.325609	ring finger and CHY zinc finger domain containing 1
ENSG00000242125	SNHG3	1107.6	-0.539511	0.257799	-2.09276	0.0363704	0.326013	small nucleolar RNA host gene 3
ENSG00000182774	RPS17	151.831	-1.00235	0.479186	-2.09178	0.0364585	0.326413	ribosomal protein S17
ENSG00000197122	SRC	404.38	0.693666	0.331619	2.09175	0.0364606	0.326413	SRC proto-oncogene	non-receptor tyrosine kinase
ENSG00000151748	SAV1	1071.65	-0.546882	0.26163	-2.09029	0.0365916	0.327382	salvador family WW domain containing protein 1
ENSG00000118960	HS1BP3	370.55	0.673865	0.322555	2.08914	0.0366948	0.3281	HCLS1 binding protein 3
ENSG00000110042	DTX4	7.21705	-4.1312	1.97869	-2.08784	0.0368119	0.328941	deltex E3 ubiquitin ligase 4
ENSG00000162545	CAMK2N1	494.084	-0.616319	0.2955	-2.08568	0.0370074	0.330269	calcium/calmodulin dependent protein kinase II inhibitor 1
ENSG00000184203	PPP1R2	1422.14	0.531507	0.254857	2.08551	0.0370229	0.330269	protein phosphatase 1 regulatory inhibitor subunit 2
ENSG00000182196	ARL6IP4	2953.41	-0.505232	0.242267	-2.08544	0.0370296	0.330269	ADP ribosylation factor like GTPase 6 interacting protein 4
ENSG00000121057	AKAP1	1177.11	-0.544948	0.261517	-2.0838	0.0371787	0.331392	A-kinase anchoring protein 1
ENSG00000172731	LRRC20	2700.23	0.651387	0.312728	2.08292	0.0372588	0.331747	leucine rich repeat containing 20
ENSG00000127324	TSPAN8	22.5296	-2.295	1.10186	-2.08285	0.0372648	0.331747	tetraspanin 8
ENSG00000151693	ASAP2	1811.57	-0.594017	0.285366	-2.0816	0.0373794	0.332561	ArfGAP with SH3 domain	ankyrin repeat and PH domain 2
ENSG00000109265	CRACD	176.517	0.838492	0.403351	2.07881	0.0376344	0.334622	capping protein inhibiting regulator of actin dynamics
ENSG00000109805	NCAPG	3318.49	0.519102	0.249868	2.07751	0.0377548	0.335428	non-SMC condensin I complex subunit G
ENSG00000144061	NPHP1	64.9213	1.26745	0.610137	2.07732	0.037772	0.335428	nephrocystin 1
ENSG00000124067	SLC12A4	596.41	0.597202	0.287641	2.07621	0.0378746	0.336131	solute carrier family 12 member 4
ENSG00000137801	THBS1	4592.66	-0.663672	0.320039	-2.07372	0.0381054	0.33797	thrombospondin 1
ENSG00000156140	ADAMTS3	66.1218	1.26051	0.608165	2.07265	0.0382052	0.338482	ADAM metallopeptidase with thrombospondin type 1 motif 3
ENSG00000109099	PMP22	806.523	-0.657812	0.317386	-2.07259	0.0382104	0.338482	peripheral myelin protein 22
ENSG00000148672	GLUD1	4881.85	0.470926	0.227268	2.07212	0.0382542	0.338661	glutamate dehydrogenase 1
ENSG00000158092	NCK1	625.514	0.587915	0.283761	2.07186	0.0382781	0.338663	NCK adaptor protein 1
ENSG00000154640	BTG3	410.669	-0.686463	0.331407	-2.07136	0.0383251	0.338665	BTG anti-proliferation factor 3
ENSG00000261455	LINC01003	49.2445	-1.54206	0.744469	-2.07135	0.0383257	0.338665	long intergenic non-protein coding RNA 1003
ENSG00000146232	NFKBIE	331.829	-0.753374	0.363901	-2.07027	0.038427	0.339295	NFKB inhibitor epsilon
ENSG00000279561	LOC105376060	6.7308	4.4762	2.16233	2.07009	0.0384443	0.339295	translation initiation factor IF-2-like
ENSG00000187764	SEMA4D	247.166	0.996941	0.481723	2.06953	0.038496	0.339542	semaphorin 4D
ENSG00000124789	NUP153	4414.95	-0.58773	0.284246	-2.06768	0.0386702	0.340869	nucleoporin 153
ENSG00000123892	RAB38	505.99	0.618517	0.299183	2.06735	0.038701	0.34093	RAB38	member RAS oncogene family
ENSG00000105619	TFPT	50.7017	-9.4364	4.56531	-2.06698	0.0387362	0.341031	TCF3 fusion partner
ENSG00000169684	CHRNA5	131.507	-0.923448	0.446857	-2.06654	0.0387774	0.341184	cholinergic receptor nicotinic alpha 5 subunit
ENSG00000225756	DBH-AS1	38.1563	1.7276	0.836243	2.0659	0.0388377	0.341505	DBH antisense RNA 1
ENSG00000166352	IFTAP	179.179	0.82031	0.397121	2.06564	0.038862	0.341509	intraflagellar transport associated protein
NA	FOXCUT	6.9889	-4.06437	1.96834	-2.06487	0.0389356	0.341822	FOXC1 upstream transcript
ENSG00000103249	CLCN7	574.981	-0.591981	0.286706	-2.06476	0.0389453	0.341822	chloride voltage-gated channel 7
ENSG00000112701	SENP6	1174.86	-0.545461	0.264439	-2.06271	0.0391398	0.343026	SUMO specific peptidase 6
ENSG00000250571	GLI4	256.246	0.769411	0.373024	2.06263	0.0391477	0.343026	GLI family zinc finger 4
ENSG00000078081	LAMP3	11.5174	-2.8839	1.39837	-2.06232	0.039177	0.343026	lysosomal associated membrane protein 3
ENSG00000107614	TRDMT1	413.27	0.634453	0.307642	2.06231	0.0391784	0.343026	tRNA aspartic acid methyltransferase 1
ENSG00000181804	SLC9A9	26.2854	2.07453	1.00632	2.0615	0.0392555	0.343319	solute carrier family 9 member A9
ENSG00000197903	H2BC12	2054.64	-2.04727	0.993119	-2.06145	0.0392598	0.343319	H2B clustered histone 12
ENSG00000145029	NICN1	122.547	-1.05692	0.513062	-2.06003	0.0393959	0.34427	nicolin 1	tubulin polyglutamylase complex subunit
ENSG00000290898	AGAP12P	7.20163	-4.09464	1.98787	-2.05981	0.0394165	0.34427	ArfGAP with GTPase domain	ankyrin repeat and PH domain 12	pseudogene
ENSG00000165626	BEND7	708.201	0.614611	0.298431	2.05948	0.0394487	0.344282	BEN domain containing 7
ENSG00000164023	SGMS2	1215.39	-0.566778	0.275236	-2.05924	0.0394713	0.344282	sphingomyelin synthase 2
ENSG00000099139	PCSK5	142.105	0.935526	0.45435	2.05904	0.03949	0.344282	proprotein convertase subtilisin/kexin type 5
ENSG00000068305	MEF2A	1029.6	-0.542111	0.263377	-2.05831	0.0395606	0.344687	myocyte enhancer factor 2A
ENSG00000159399	HK2	3192.4	-0.504912	0.245406	-2.05746	0.039642	0.345186	hexokinase 2
ENSG00000174365	SNHG11	70.2663	-1.16975	0.568771	-2.05663	0.0397222	0.345675	small nucleolar RNA host gene 11
ENSG00000028528	SNX1	1477.75	-0.52066	0.253209	-2.05624	0.0397594	0.345788	sorting nexin 1
ENSG00000170734	POLH	1096.67	-0.551134	0.268066	-2.05597	0.0397858	0.345808	DNA polymerase eta
ENSG00000174485	DENND4A	513.991	-0.635409	0.309105	-2.05564	0.039817	0.34587	DENN domain containing 4A
ENSG00000171988	JMJD1C	1931.02	0.567972	0.276437	2.05461	0.0399163	0.346522	jumonji domain containing 1C
ENSG00000128965	CHAC1	39.6657	1.54127	0.750436	2.05384	0.0399915	0.346645	ChaC glutathione specific gamma-glutamylcyclotransferase 1
ENSG00000131873	CHSY1	1202.93	-0.519858	0.253124	-2.05377	0.0399981	0.346645	chondroitin sulfate synthase 1
ENSG00000102738	MRPS31	539.761	0.612788	0.29838	2.05372	0.040003	0.346645	mitochondrial ribosomal protein S31
ENSG00000176142	TMEM39A	703.679	0.588535	0.286657	2.0531	0.0400629	0.346796	transmembrane protein 39A
ENSG00000170525	PFKFB3	1557.03	0.537777	0.261943	2.05303	0.0400695	0.346796	6-phosphofructo-2-kinase/fructose-2	6-biphosphatase 3
ENSG00000117625	RCOR3	931.925	0.5531	0.269438	2.05279	0.0400931	0.346796	REST corepressor 3
NA	PRKG1-AS1	32.9217	1.68886	0.822821	2.05253	0.0401181	0.346803	PRKG1 antisense RNA 1
ENSG00000138185	ENTPD1	416.594	-0.665388	0.324422	-2.051	0.0402673	0.347706	ectonucleoside triphosphate diphosphohydrolase 1
ENSG00000188191	PRKAR1B	380.976	-0.657496	0.32058	-2.05096	0.0402712	0.347706	protein kinase cAMP-dependent type I regulatory subunit beta
ENSG00000171643	S100Z	9.79437	3.58523	1.74872	2.0502	0.040345	0.348134	S100 calcium binding protein Z
ENSG00000132329	RAMP1	238.937	0.845521	0.41247	2.04989	0.0403748	0.348181	receptor activity modifying protein 1
ENSG00000136630	HLX	48.9607	-1.3821	0.674491	-2.0491	0.040452	0.348407	H2.0 like homeobox
ENSG00000177706	FAM20C	622.503	0.840662	0.410266	2.04907	0.0404557	0.348407	FAM20C golgi associated secretory pathway kinase
ENSG00000230844	ZNF674-AS1	69.7214	-1.21626	0.593624	-2.04888	0.0404739	0.348407	ZNF674 antisense RNA 1 (head to head)
ENSG00000197971	MBP	1095.81	-0.693288	0.338475	-2.04827	0.0405335	0.34871	myelin basic protein
ENSG00000250510	GPR162	48.4459	1.45439	0.710183	2.0479	0.0405695	0.34881	G protein-coupled receptor 162
ENSG00000169375	SIN3A	1391.27	-0.611707	0.298745	-2.04759	0.0406	0.348863	SIN3 transcription regulator family member A
ENSG00000135916	ITM2C	1111.6	0.534312	0.261039	2.04687	0.0406712	0.349265	integral membrane protein 2C
ENSG00000160404	TOR2A	103.408	-0.991366	0.484566	-2.04588	0.0407678	0.349839	torsin family 2 member A
ENSG00000155666	KDM8	55.4191	-1.53096	0.748383	-2.04569	0.0407869	0.349839	lysine demethylase 8
ENSG00000185436	IFNLR1	31.4134	-1.82917	0.894289	-2.04539	0.0408159	0.349879	interferon lambda receptor 1
ENSG00000166848	TERF2IP	1046.37	0.620212	0.30329	2.04495	0.0408598	0.350045	TERF2 interacting protein
ENSG00000148450	MSRB2	228.265	0.764913	0.374118	2.04458	0.0408965	0.35015	methionine sulfoxide reductase B2
ENSG00000259956	RBM15B	930.781	-0.633035	0.309655	-2.04432	0.0409215	0.350155	RNA binding motif protein 15B
ENSG00000144320	LNPK	1534.03	0.520677	0.254769	2.04372	0.0409813	0.350379	lunapark	ER junction formation factor
ENSG00000133114	GPALPP1	675.5	0.569137	0.278508	2.04353	0.0410004	0.350379	GPALPP motifs containing 1
ENSG00000198755	RPL10A	14392.6	-0.459844	0.225149	-2.0424	0.0411119	0.350379	ribosomal protein L10a
ENSG00000198830	HMGN2	12488.9	-0.512164	0.25078	-2.04228	0.0411237	0.350379	high mobility group nucleosomal binding domain 2
ENSG00000197632	SERPINB2	9.77971	-3.12887	1.53214	-2.04216	0.0411359	0.350379	serpin family B member 2
ENSG00000076662	ICAM3	185.534	-0.806552	0.394978	-2.04202	0.0411496	0.350379	intercellular adhesion molecule 3
ENSG00000106028	SSBP1	1260.02	-0.659847	0.323227	-2.04144	0.0412075	0.350379	single stranded DNA binding protein 1
ENSG00000163874	ZC3H12A	184.338	-1.21303	0.594228	-2.04136	0.0412154	0.350379	zinc finger CCCH-type containing 12A
ENSG00000153012	LGI2	14.0886	-2.98343	1.46155	-2.04127	0.0412235	0.350379	leucine rich repeat LGI family member 2
ENSG00000159708	LRRC36	15.5751	-2.4931	1.22137	-2.04124	0.0412268	0.350379	leucine rich repeat containing 36
ENSG00000104522	GFUS	140.129	3.90202	1.91195	2.04086	0.0412649	0.350379	GDP-L-fucose synthase
ENSG00000115204	MPV17	485.839	0.68621	0.336249	2.04078	0.0412729	0.350379	mitochondrial inner membrane protein MPV17
ENSG00000164054	SHISA5	1876.34	-0.516838	0.253304	-2.04039	0.0413119	0.350379	shisa family member 5
ENSG00000120458	MSANTD2	400.795	-0.656936	0.321995	-2.04021	0.0413297	0.350379	Myb/SANT DNA binding domain containing 2
ENSG00000164068	RNF123	581.362	-0.585484	0.286985	-2.04012	0.0413384	0.350379	ring finger protein 123
ENSG00000151657	KIN	341.723	0.784014	0.384299	2.04011	0.041339	0.350379	Kin17 DNA and RNA binding protein
ENSG00000248905	FMN1	227.221	0.753925	0.369691	2.03934	0.0414164	0.350543	formin 1
ENSG00000169499	PLEKHA2	638.659	0.62447	0.306229	2.03923	0.0414274	0.350543	pleckstrin homology domain containing A2
ENSG00000112062	MAPK14	3513.08	-0.506355	0.248313	-2.03918	0.0414319	0.350543	mitogen-activated protein kinase 14
ENSG00000136108	CKAP2	3714.44	0.486167	0.238642	2.03722	0.0416279	0.351994	cytoskeleton associated protein 2
ENSG00000004139	SARM1	16.7542	2.36755	1.16233	2.0369	0.0416603	0.35206	sterile alpha and TIR motif containing 1
ENSG00000137872	SEMA6D	52.3652	1.36795	0.672129	2.03526	0.0418252	0.353228	semaphorin 6D
ENSG00000139973	SYT16	31.2196	1.91407	0.940559	2.03503	0.0418478	0.353228	synaptotagmin 16
ENSG00000107611	CUBN	51.2974	1.39082	0.68377	2.03405	0.0419465	0.353853	cubilin
ENSG00000148481	MINDY3	622.131	0.577597	0.284004	2.03376	0.0419756	0.353889	MINDY lysine 48 deubiquitinase 3
ENSG00000137338	PGBD1	558.594	-0.631647	0.31064	-2.03337	0.0420147	0.354011	piggyBac transposable element derived 1
ENSG00000183323	CCDC125	39.5127	1.52433	0.749833	2.03289	0.0420635	0.354214	coiled-coil domain containing 125
ENSG00000173988	LRRC63	11.5628	3.02233	1.48804	2.03108	0.0422466	0.355547	leucine rich repeat containing 63
ENSG00000121743	GJA3	142.436	-0.896262	0.441371	-2.03063	0.0422924	0.355723	gap junction protein alpha 3
ENSG00000172348	RCAN2	68.2652	1.18893	0.585722	2.02986	0.0423712	0.355923	regulator of calcineurin 2
ENSG00000186166	CENATAC	426.586	0.650028	0.320242	2.0298	0.0423769	0.355923	centrosomal AT-AC splicing factor
ENSG00000163807	KIAA1143	1036.53	-0.551602	0.271791	-2.02951	0.0424067	0.355923	KIAA1143
ENSG00000136492	BRIP1	1107.9	-0.569579	0.280663	-2.0294	0.0424173	0.355923	BRCA1 interacting helicase 1
ENSG00000114395	CYB561D2	119.069	-0.929659	0.458146	-2.02918	0.0424404	0.355923	cytochrome b561 family member D2
ENSG00000060656	PTPRU	100.74	1.28904	0.635335	2.02891	0.0424673	0.35594	protein tyrosine phosphatase receptor type U
ENSG00000198203	SULT1C2	117.669	1.1838	0.58379	2.02778	0.0425829	0.356503	sulfotransferase family 1C member 2
ENSG00000137185	ZSCAN9	322.267	-0.669586	0.330209	-2.02777	0.0425842	0.356503	zinc finger and SCAN domain containing 9
ENSG00000267100	ILF3-DT	343.138	-0.656094	0.323781	-2.02635	0.0427288	0.357186	ILF3 divergent transcript
ENSG00000170275	CRTAP	3273.48	-0.481541	0.237668	-2.02611	0.0427539	0.357186	cartilage associated protein
ENSG00000135318	NT5E	18887.4	0.473904	0.233907	2.02604	0.0427612	0.357186	5'-nucleotidase ecto
ENSG00000103742	IGDCC4	444.091	-0.776779	0.383407	-2.02599	0.0427655	0.357186	immunoglobulin superfamily DCC subclass member 4
ENSG00000188060	RAB42	34.9376	1.64004	0.809697	2.0255	0.0428165	0.357403	RAB42	member RAS oncogene family
ENSG00000188486	H2AX	2168.92	-0.61846	0.305516	-2.02431	0.0429379	0.358208	H2A.X variant histone
ENSG00000163636	PSMD6	1648.83	-0.528166	0.260968	-2.02388	0.042983	0.358375	proteasome 26S subunit	non-ATPase 6
ENSG00000090565	RAB11FIP3	75.1849	-1.35049	0.667876	-2.02207	0.0431696	0.359721	RAB11 family interacting protein 3
ENSG00000118523	CCN2	7093.82	-0.634273	0.313782	-2.02138	0.0432401	0.359875	cellular communication network factor 2
ENSG00000171813	PWWP2B	122.408	0.948782	0.469419	2.02119	0.0432605	0.359875	PWWP domain containing 2B
ENSG00000142632	ARHGEF19	70.9993	1.19686	0.592166	2.02116	0.0432634	0.359875	Rho guanine nucleotide exchange factor 19
ENSG00000100106	TRIOBP	1053	0.607512	0.300691	2.02039	0.0433433	0.360085	TRIO and F-actin binding protein
ENSG00000157077	ZFYVE9	469.794	-0.613342	0.303603	-2.02021	0.0433618	0.360085	zinc finger FYVE-type containing 9
ENSG00000157870	PRXL2B	15.0239	3.23148	1.59959	2.02019	0.0433641	0.360085	peroxiredoxin like 2B
ENSG00000148484	RSU1	1376.1	0.533644	0.264295	2.01912	0.0434748	0.360795	Ras suppressor protein 1
ENSG00000131171	SH3BGRL	1149.84	0.59063	0.292733	2.01764	0.0436287	0.361863	SH3 domain binding glutamate rich protein like
ENSG00000186350	RXRA	662.856	0.690088	0.342129	2.01704	0.0436913	0.361938	retinoid X receptor alpha
ENSG00000112339	HBS1L	1251.5	0.556634	0.275974	2.01698	0.0436974	0.361938	HBS1 like translational GTPase
ENSG00000166016	ABTB2	175.427	-0.843179	0.418072	-2.01683	0.0437135	0.361938	ankyrin repeat and BTB domain containing 2
ENSG00000143631	FLG	52.0914	-1.32755	0.658554	-2.01586	0.043815	0.362555	filaggrin
ENSG00000132912	DCTN4	1880.2	0.489525	0.242885	2.01546	0.0438567	0.362555	dynactin subunit 4
ENSG00000165821	SALL2	116.151	0.983927	0.488207	2.01539	0.043864	0.362555	spalt like transcription factor 2
ENSG00000122378	PRXL2A	696.837	0.564008	0.279897	2.01506	0.0438985	0.362631	peroxiredoxin like 2A
ENSG00000119922	IFIT2	467.275	0.806348	0.400279	2.01447	0.0439607	0.362936	interferon induced protein with tetratricopeptide repeats 2
ENSG00000196497	IPO4	1273.71	-0.652951	0.324347	-2.01313	0.0441011	0.363885	importin 4
ENSG00000148411	NACC2	571.601	-0.583225	0.289749	-2.01286	0.044129	0.363906	NACC family member 2
ENSG00000156675	RAB11FIP1	1127.97	-0.558545	0.277621	-2.0119	0.0442302	0.36453	RAB11 family interacting protein 1
ENSG00000186577	SMIM29	585.114	-0.61222	0.304525	-2.01041	0.044388	0.365474	small integral membrane protein 29
ENSG00000133142	TCEAL4	819.292	0.619504	0.308159	2.01034	0.0443957	0.365474	transcription elongation factor A like 4
ENSG00000164077	MON1A	193.487	-0.864439	0.430343	-2.00872	0.0445665	0.366461	MON1 homolog A	secretory trafficking associated
ENSG00000105726	ATP13A1	792.771	-0.577477	0.287485	-2.00872	0.0445668	0.366461	ATPase 13A1
ENSG00000185345	PRKN	6.76652	-4.00917	1.99631	-2.00829	0.0446123	0.366625	parkin RBR E3 ubiquitin protein ligase
ENSG00000008394	MGST1	1593.84	0.53688	0.267398	2.00779	0.0446653	0.366849	microsomal glutathione S-transferase 1
ENSG00000112576	CCND3	1586.89	-0.566111	0.282002	-2.00747	0.0446995	0.36692	cyclin D3
ENSG00000089154	GCN1	3998.11	-0.46772	0.233069	-2.00679	0.0447724	0.367308	GCN1 activator of EIF2AK4
ENSG00000167972	ABCA3	495.076	-0.605383	0.301798	-2.00592	0.0448649	0.367856	ATP binding cassette subfamily A member 3
ENSG00000069329	VPS35	3265.14	0.475307	0.237004	2.00548	0.0449114	0.367963	VPS35 retromer complex component
NA	MRPS30-DT	32.3535	1.79454	0.894894	2.00532	0.0449293	0.367963	MRPS30 divergent transcript
ENSG00000103121	CMC2	510.892	0.644445	0.321449	2.00481	0.0449831	0.368049	C-X9-C motif containing 2
ENSG00000018510	AGPS	1992.64	0.484616	0.241736	2.00474	0.0449912	0.368049	alkylglycerone phosphate synthase
ENSG00000178700	DHFR2	109.98	0.973678	0.485912	2.00382	0.0450897	0.368207	dihydrofolate reductase 2
ENSG00000249307	LINC01088	9.58819	-3.11042	1.55231	-2.00374	0.0450982	0.368207	long intergenic non-protein coding RNA 1088
ENSG00000126822	PLEKHG3	340.454	-0.69023	0.344472	-2.00374	0.0450984	0.368207	pleckstrin homology and RhoGEF domain containing G3
ENSG00000099968	BCL2L13	413.721	0.637282	0.318098	2.00341	0.0451332	0.368207	BCL2 like 13
ENSG00000071894	CPSF1	1604.91	-0.496501	0.247835	-2.00336	0.0451391	0.368207	cleavage and polyadenylation specific factor 1
ENSG00000105173	CCNE1	146.973	0.887399	0.443025	2.00305	0.0451723	0.368268	cyclin E1
ENSG00000112167	SAYSD1	310.389	-0.703277	0.351259	-2.00216	0.0452675	0.368835	SAYSVFN motif domain containing 1
ENSG00000163510	CWC22	1005.92	0.534964	0.267313	2.00127	0.0453635	0.36938	CWC22 spliceosome associated protein homolog
ENSG00000147246	HTR2C	50.3405	1.67808	0.838596	2.00106	0.045386	0.36938	5-hydroxytryptamine receptor 2C
ENSG00000119866	BCL11A	193.985	-0.872005	0.435968	-2.00016	0.0454832	0.369872	BCL11 transcription factor A
ENSG00000164080	RAD54L2	343.43	-0.735608	0.3678	-2.00002	0.0454981	0.369872	RAD54 like 2
ENSG00000185585	OLFML2A	279.593	0.996951	0.498551	1.9997	0.0455328	0.369944	olfactomedin like 2A
ENSG00000153487	ING1	316.029	0.668059	0.334209	1.99893	0.0456162	0.370412	inhibitor of growth family member 1
ENSG00000272695	GAS6-DT	202.859	0.789774	0.395237	1.99823	0.0456919	0.370653	GAS6 divergent transcript
ENSG00000134899	ERCC5	23.9904	1.90897	0.955401	1.99808	0.0457079	0.370653	ERCC excision repair 5	endonuclease
ENSG00000150636	CCDC102B	19.735	2.43792	1.22022	1.99794	0.0457236	0.370653	coiled-coil domain containing 102B
ENSG00000290659	USP32P2	294.277	0.846327	0.423694	1.9975	0.045771	0.370828	ubiquitin specific peptidase 32 pseudogene 2
ENSG00000128050	PAICS	9225.04	0.476588	0.238704	1.99656	0.0458728	0.371443	phosphoribosylaminoimidazole carboxylase and phosphoribosylaminoimidazolesuccinocarboxamide synthase
ENSG00000167992	VWCE	15.5431	2.39621	1.20091	1.99534	0.046006	0.372311	von Willebrand factor C and EGF domains
ENSG00000134590	RTL8C	825.514	-0.531228	0.266305	-1.99481	0.0460634	0.372395	retrotransposon Gag like 8C
NA	EMSLR	83.0944	-1.13179	0.567378	-1.99477	0.0460684	0.372395	E2F1 mRNA stabilizing lncRNA
ENSG00000140350	ANP32A	4248.09	-0.481144	0.241316	-1.99383	0.0461702	0.372722	acidic nuclear phosphoprotein 32 family member A
ENSG00000264522	OTUD7B	618.34	-0.596559	0.299211	-1.99377	0.0461768	0.372722	OTU deubiquitinase 7B
ENSG00000265808	SEC22B	1691.28	0.52555	0.263651	1.99336	0.0462224	0.372722	SEC22 homolog B	vesicle trafficking protein
ENSG00000197724	PHF2	621.3	-0.578199	0.290069	-1.99331	0.046227	0.372722	PHD finger protein 2
ENSG00000153714	LURAP1L	62.6994	-1.27402	0.639181	-1.99321	0.046239	0.372722	leucine rich adaptor protein 1 like
ENSG00000197608	ZNF841	390.876	0.708197	0.355533	1.99193	0.0463789	0.37364	zinc finger protein 841
ENSG00000120341	SEC16B	21.8548	1.9882	0.998396	1.9914	0.0464375	0.37389	SEC16 homolog B	endoplasmic reticulum export factor
ENSG00000162511	LAPTM5	204.714	2.64883	1.33041	1.99099	0.0464817	0.37389	lysosomal protein transmembrane 5
ENSG00000160803	UBQLN4	1059.99	-0.524081	0.263234	-1.99093	0.0464883	0.37389	ubiquilin 4
ENSG00000137414	FAM8A1	516.099	-0.713059	0.358251	-1.99039	0.0465482	0.374162	family with sequence similarity 8 member A1
ENSG00000233927	RPS28	3912.83	-0.48834	0.245433	-1.98971	0.0466229	0.374552	ribosomal protein S28
ENSG00000025423	HSD17B6	16.2173	-2.26745	1.14061	-1.98792	0.0468205	0.375716	hydroxysteroid 17-beta dehydrogenase 6
ENSG00000168491	CCDC110	17.0112	2.61817	1.31719	1.98769	0.046846	0.375716	coiled-coil domain containing 110
ENSG00000112294	ALDH5A1	186.918	-0.816745	0.410902	-1.98769	0.0468465	0.375716	aldehyde dehydrogenase 5 family member A1
ENSG00000129657	SEC14L1	2341.84	0.47444	0.238844	1.9864	0.0469888	0.376608	SEC14 like lipid binding 1
ENSG00000159363	ATP13A2	736.281	-0.589079	0.296585	-1.98621	0.0470102	0.376608	ATPase cation transporting 13A2
ENSG00000182973	CNOT10	523.224	-0.5998	0.302059	-1.9857	0.0470663	0.376846	CCR4-NOT transcription complex subunit 10
ENSG00000182768	NGRN	2176.2	-0.527912	0.265905	-1.98534	0.047107	0.376904	neugrin	neurite outgrowth associated
ENSG00000133794	BMAL1	274.331	0.73048	0.36797	1.98516	0.0471266	0.376904	basic helix-loop-helix ARNT like 1
ENSG00000173546	CSPG4	1156.54	0.533156	0.268631	1.98471	0.0471762	0.376904	chondroitin sulfate proteoglycan 4
ENSG00000136305	CIDEB	9.34363	-3.08444	1.55411	-1.98469	0.0471788	0.376904	cell death inducing DFFA like effector b
ENSG00000124782	RREB1	506.256	-0.634582	0.319958	-1.98333	0.0473306	0.377754	ras responsive element binding protein 1
ENSG00000154920	EME1	422.694	0.61608	0.310675	1.98304	0.0473633	0.377754	essential meiotic structure-specific endonuclease 1
ENSG00000006534	ALDH3B1	363.825	0.799498	0.403174	1.98301	0.0473661	0.377754	aldehyde dehydrogenase 3 family member B1
ENSG00000123143	PKN1	8294.16	0.461576	0.232799	1.98272	0.0473982	0.377754	protein kinase N1
ENSG00000182568	SATB1	228.708	-0.944109	0.476208	-1.98256	0.047417	0.377754	SATB homeobox 1
ENSG00000239264	TXNDC5	142.985	-0.854644	0.431163	-1.98218	0.047459	0.377878	thioredoxin domain containing 5
ENSG00000019549	SNAI2	330.79	0.801274	0.40455	1.98066	0.0476298	0.37888	snail family transcriptional repressor 2
ENSG00000183723	CMTM4	450.562	-0.624416	0.315268	-1.98059	0.0476377	0.37888	CKLF like MARVEL transmembrane domain containing 4
ENSG00000112655	PTK7	2711.99	-0.46371	0.234243	-1.97961	0.0477468	0.379537	protein tyrosine kinase 7 (inactive)
ENSG00000166341	DCHS1	20.3155	-2.13749	1.08004	-1.97909	0.0478055	0.37968	dachsous cadherin-related 1
ENSG00000139278	GLIPR1	845.951	-0.56258	0.284277	-1.97898	0.0478178	0.37968	GLI pathogenesis related 1
ENSG00000140534	TICRR	384.453	-0.622808	0.314781	-1.97854	0.0478675	0.379864	TOPBP1 interacting checkpoint and replication regulator
ENSG00000158560	DYNC1I1	23.6985	1.90969	0.966146	1.9766	0.0480867	0.381281	dynein cytoplasmic 1 intermediate chain 1
ENSG00000164683	HEY1	15.6451	2.6465	1.33901	1.97646	0.0481028	0.381281	hes related family bHLH transcription factor with YRPW motif 1
ENSG00000154080	CHST9	10.9968	2.94025	1.48779	1.97625	0.048126	0.381281	carbohydrate sulfotransferase 9
ENSG00000215788	TNFRSF25	8.97795	3.4494	1.74619	1.97539	0.0482236	0.381815	TNF receptor superfamily member 25
ENSG00000070159	PTPN3	404.43	-0.615928	0.311881	-1.97488	0.0482814	0.381815	protein tyrosine phosphatase non-receptor type 3
ENSG00000162576	MXRA8	923.991	0.566396	0.286814	1.97479	0.0482924	0.381815	matrix remodeling associated 8
ENSG00000197299	BLM	557.425	-0.60826	0.308024	-1.97472	0.0483	0.381815	BLM RecQ like helicase
ENSG00000178741	COX5A	1483.1	-0.553564	0.28054	-1.97321	0.0484716	0.38296	cytochrome c oxidase subunit 5A
ENSG00000189056	RELN	78.0276	-1.18227	0.600029	-1.97036	0.0487973	0.38473	reelin
ENSG00000069667	RORA	188.303	-1.0278	0.521676	-1.97019	0.0488162	0.38473	RAR related orphan receptor A
ENSG00000101104	PABPC1L	200.137	-0.972146	0.493448	-1.97011	0.0488261	0.38473	poly(A) binding protein cytoplasmic 1 like
ENSG00000196296	ATP2A1	21.7433	2.0324	1.03165	1.97004	0.0488333	0.38473	ATPase sarcoplasmic/endoplasmic reticulum Ca2+ transporting 1
ENSG00000180917	CMTR2	451.591	0.653497	0.331752	1.96984	0.048857	0.38473	cap methyltransferase 2
ENSG00000166073	GPR176	538.295	0.639545	0.324676	1.96979	0.0488621	0.38473	G protein-coupled receptor 176
ENSG00000057294	PKP2	929.586	-0.580444	0.294715	-1.96951	0.0488944	0.38473	plakophilin 2
ENSG00000032742	IFT88	277.542	0.685626	0.348145	1.96937	0.0489104	0.38473	intraflagellar transport 88
ENSG00000166855	CLPX	951.096	-0.519345	0.263867	-1.96821	0.0490441	0.385526	caseinolytic mitochondrial matrix peptidase chaperone subunit X
ENSG00000063854	HAGH	393.123	-0.646328	0.328415	-1.96802	0.0490655	0.385526	hydroxyacylglutathione hydrolase
ENSG00000236753	MKLN1-AS	37.287	1.86706	0.949738	1.96586	0.0493143	0.387201	MKLN1 antisense RNA
ENSG00000235448	LURAP1L-AS1	20.7431	2.15793	1.09787	1.96555	0.0493502	0.387201	LURAP1L antisense RNA 1
ENSG00000067141	NEO1	689.832	-0.560149	0.285027	-1.96525	0.0493857	0.387201	neogenin 1
ENSG00000175110	MRPS22	1517.88	0.484656	0.246614	1.96524	0.0493868	0.387201	mitochondrial ribosomal protein S22
ENSG00000077348	EXOSC5	414.308	-0.625428	0.318459	-1.96392	0.0495392	0.388183	exosome component 5
ENSG00000138944	SHISAL1	7.91495	3.85841	1.96512	1.96345	0.0495945	0.388238	shisa like 1
ENSG00000130382	MLLT1	1276.97	-0.539408	0.274733	-1.96339	0.0496003	0.388238	MLLT1 super elongation complex subunit
ENSG00000067208	EVI5	1003.95	-0.522089	0.266207	-1.96121	0.0498542	0.390012	ecotropic viral integration site 5
ENSG00000198742	SMURF1	652.135	-0.547447	0.279444	-1.95905	0.0501065	0.391612	SMAD specific E3 ubiquitin protein ligase 1
ENSG00000089280	FUS	8343.4	-0.62284	0.317982	-1.95873	0.0501446	0.391612	FUS RNA binding protein
ENSG00000164663	USP49	565.316	-0.606378	0.309605	-1.95855	0.0501651	0.391612	ubiquitin specific peptidase 49
ENSG00000096433	ITPR3	4544.85	-0.544058	0.277789	-1.95853	0.0501681	0.391612	inositol 1	4	5-trisphosphate receptor type 3
ENSG00000155657	TTN	250.431	1.02435	0.523272	1.95759	0.0502778	0.392255	titin
ENSG00000087086	FTL	18231	0.457096	0.233624	1.95655	0.0504004	0.392997	ferritin light chain
ENSG00000100342	APOL1	88.1831	-1.08831	0.556444	-1.95584	0.0504841	0.393436	apolipoprotein L1
ENSG00000173269	MMRN2	27.3483	2.20288	1.12682	1.95496	0.0505878	0.394029	multimerin 2
ENSG00000078070	MCCC1	990.636	0.532722	0.272661	1.95379	0.0507259	0.39489	methylcrotonyl-CoA carboxylase subunit 1
ENSG00000178057	NDUFAF3	507.595	-0.61166	0.313126	-1.9534	0.0507724	0.395037	NADH:ubiquinone oxidoreductase complex assembly factor 3
ENSG00000140682	TGFB1I1	705.493	-0.555898	0.284716	-1.95247	0.0508826	0.39568	transforming growth factor beta 1 induced transcript 1
ENSG00000186184	POLR1D	1348.27	0.485791	0.248899	1.95176	0.0509667	0.396119	RNA polymerase I and III subunit D
ENSG00000164535	DAGLB	670.67	-0.58359	0.299114	-1.95106	0.0510498	0.396549	diacylglycerol lipase beta
ENSG00000124532	MRS2	846.139	-0.519962	0.26674	-1.94932	0.0512574	0.397756	magnesium transporter MRS2
ENSG00000259494	MRPL46	407.18	-0.640466	0.32857	-1.94925	0.0512653	0.397756	mitochondrial ribosomal protein L46
ENSG00000082482	KCNK2	16.2084	2.31197	1.1862	1.94906	0.0512884	0.397756	potassium two pore domain channel subfamily K member 2
ENSG00000128590	DNAJB9	210.827	0.740206	0.379994	1.94794	0.0514221	0.398577	DnaJ heat shock protein family (Hsp40) member B9
ENSG00000187792	ZNF70	43.429	1.398	0.71784	1.9475	0.0514744	0.398766	zinc finger protein 70
ENSG00000145780	FEM1C	1049.97	-0.505829	0.259784	-1.94711	0.0515217	0.398779	fem-1 homolog C
ENSG00000166920	C15orf48	48.8462	-1.45275	0.746136	-1.94703	0.0515316	0.398779	chromosome 15 open reading frame 48
ENSG00000183801	OLFML1	30.6346	-1.65593	0.850912	-1.94606	0.0516474	0.399459	olfactomedin like 1
ENSG00000136938	ANP32B	7434.12	-0.506309	0.260351	-1.94472	0.0518091	0.400222	acidic nuclear phosphoprotein 32 family member B
ENSG00000243646	IL10RB	291.582	0.668222	0.343634	1.94457	0.0518264	0.400222	interleukin 10 receptor subunit beta
ENSG00000168036	CTNNB1	4201.35	-0.462485	0.237837	-1.94454	0.05183	0.400222	catenin beta 1
ENSG00000064042	LIMCH1	5071.19	-0.448751	0.230806	-1.94428	0.0518619	0.400253	LIM and calponin homology domains 1
ENSG00000186862	PDZD7	163.715	0.994231	0.511535	1.94362	0.051941	0.400648	PDZ domain containing 7
ENSG00000156265	MAP3K7CL	122.87	0.949994	0.489258	1.9417	0.0521732	0.402222	MAP3K7 C-terminal like
ENSG00000176095	IP6K1	880.949	-0.612844	0.315721	-1.94109	0.052247	0.402401	inositol hexakisphosphate kinase 1
ENSG00000144791	LIMD1	460.073	-0.597381	0.307762	-1.94105	0.0522525	0.402401	LIM domain containing 1
ENSG00000164400	CSF2	348.702	-0.935355	0.482093	-1.94019	0.052356	0.402981	colony stimulating factor 2
ENSG00000120756	PLS1	897.189	0.514164	0.265243	1.93846	0.0525671	0.404388	plastin 1
ENSG00000116030	SUMO1	3385.54	0.447473	0.230875	1.93816	0.0526036	0.404452	small ubiquitin like modifier 1
ENSG00000145241	CENPC	554.247	0.701299	0.362107	1.93672	0.0527796	0.405002	centromere protein C
ENSG00000065457	ADAT1	411.697	0.639966	0.330439	1.93671	0.0527804	0.405002	adenosine deaminase tRNA specific 1
ENSG00000205670	SMIM11	21.7478	2.49331	1.28748	1.93658	0.052797	0.405002	small integral membrane protein 11
ENSG00000114853	ZBTB47	235.235	-0.708485	0.365849	-1.93655	0.0528002	0.405002	zinc finger and BTB domain containing 47
ENSG00000130396	AFDN	1834.02	-0.473034	0.244283	-1.93642	0.0528166	0.405002	afadin	adherens junction formation factor
ENSG00000163110	PDLIM5	3824.7	-0.446524	0.230664	-1.93582	0.0528895	0.405239	PDZ and LIM domain 5
ENSG00000120675	DNAJC15	750.98	0.54922	0.283731	1.9357	0.052904	0.405239	DnaJ heat shock protein family (Hsp40) member C15
ENSG00000166347	CYB5A	422.042	0.595794	0.307936	1.9348	0.053015	0.405872	cytochrome b5 type A
ENSG00000083454	P2RX5	32.5417	-1.59747	0.826866	-1.93196	0.0533641	0.40822	purinergic receptor P2X 5
ENSG00000214194	SMIM30	676.126	0.539035	0.279026	1.93184	0.0533786	0.40822	small integral membrane protein 30
ENSG00000168297	PXK	382.55	-0.609516	0.31562	-1.93117	0.053462	0.408639	PX domain containing serine/threonine kinase like
ENSG00000145982	FARS2	276.226	-0.710468	0.367974	-1.93075	0.0535135	0.408747	phenylalanyl-tRNA synthetase 2	mitochondrial
ENSG00000162337	LRP5	1480.74	-0.658555	0.341136	-1.93048	0.0535475	0.408747	LDL receptor related protein 5
NA	NA	115.261	1.35354	0.701191	1.93034	0.0535648	0.408747	NA
ENSG00000130811	EIF3G	3631.81	-0.553982	0.28702	-1.93011	0.0535926	0.408747	eukaryotic translation initiation factor 3 subunit G
ENSG00000079156	OSBPL6	340.818	0.662281	0.343168	1.9299	0.0536189	0.408747	oxysterol binding protein like 6
ENSG00000144815	NXPE3	1107.49	0.509976	0.264375	1.92899	0.0537324	0.409055	neurexophilin and PC-esterase domain family member 3
ENSG00000070814	TCOF1	2055.49	-0.552748	0.286566	-1.92887	0.0537471	0.409055	treacle ribosome biogenesis factor 1
ENSG00000161914	ZNF653	170.32	-0.789468	0.40931	-1.92878	0.0537583	0.409055	zinc finger protein 653
ENSG00000025156	HSF2	557.301	0.57028	0.295688	1.92866	0.0537735	0.409055	heat shock transcription factor 2
ENSG00000174405	LIG4	619.716	0.541822	0.280984	1.9283	0.0538175	0.409154	DNA ligase 4
ENSG00000143374	TARS2	440.056	-0.591005	0.306523	-1.92809	0.0538436	0.409154	threonyl-tRNA synthetase 2	mitochondrial
ENSG00000204936	CD177	39.0611	1.863	0.966383	1.92781	0.0538789	0.409205	CD177 molecule
ENSG00000160201	U2AF1	267.989	4.03862	2.09531	1.92745	0.0539232	0.409325	U2 small nuclear RNA auxiliary factor 1
ENSG00000127419	TMEM175	123.652	0.891107	0.462438	1.92698	0.0539824	0.409557	transmembrane protein 175
ENSG00000136144	RCBTB1	571.943	0.553784	0.287446	1.92656	0.054034	0.409732	RCC1 and BTB domain containing protein 1
ENSG00000269293	ZSCAN16-AS1	57.9389	-1.19095	0.618435	-1.92574	0.0541368	0.410015	ZSCAN16 antisense RNA 1
ENSG00000107863	ARHGAP21	2594.76	0.451995	0.234729	1.9256	0.0541539	0.410015	Rho GTPase activating protein 21
ENSG00000105497	ZNF175	286.906	0.721094	0.374483	1.92557	0.0541578	0.410015	zinc finger protein 175
ENSG00000168385	SEPTIN2	11175.8	0.429401	0.223025	1.92535	0.0541859	0.410015	septin 2
ENSG00000115468	EFHD1	62.4559	-1.19286	0.619813	-1.92455	0.0542854	0.410354	EF-hand domain family member D1
ENSG00000130305	NSUN5	274.664	-0.690446	0.35876	-1.92453	0.054288	0.410354	NOP2/Sun RNA methyltransferase 5
ENSG00000119013	NDUFB3	753.493	0.539808	0.280752	1.92272	0.0545152	0.411854	NADH:ubiquinone oxidoreductase subunit B3
ENSG00000198722	UNC13B	536.547	-0.595292	0.309887	-1.921	0.0547323	0.413232	unc-13 homolog B
ENSG00000185504	FAAP100	500.793	-0.591518	0.307952	-1.92081	0.0547553	0.413232	FA core complex associated protein 100
ENSG00000102921	N4BP1	630.961	0.572451	0.298125	1.92017	0.0548361	0.413624	NEDD4 binding protein 1
ENSG00000143515	ATP8B2	523.929	0.575337	0.299768	1.91927	0.0549498	0.414025	ATPase phospholipid transporting 8B2
ENSG00000138134	STAMBPL1	1096.9	0.547844	0.285486	1.91899	0.0549857	0.414025	STAM binding protein like 1
ENSG00000112667	DNPH1	437.789	-0.583001	0.303815	-1.91894	0.0549922	0.414025	2'-deoxynucleoside 5'-phosphate N-hydrolase 1
ENSG00000198298	ZNF485	142.77	0.833156	0.434246	1.91863	0.0550315	0.414025	zinc finger protein 485
ENSG00000156509	FBXO43	248.915	-0.696757	0.363157	-1.91861	0.0550337	0.414025	F-box protein 43
ENSG00000187147	RNF220	1037.31	-0.525572	0.27406	-1.91773	0.0551453	0.414544	ring finger protein 220
ENSG00000273018	FAM106A	16.7522	2.22525	1.16053	1.91745	0.0551805	0.414544	family with sequence similarity 106 member A
ENSG00000143776	CDC42BPA	1930.47	-0.472419	0.246411	-1.9172	0.0552126	0.414544	CDC42 binding protein kinase alpha
ENSG00000164181	ELOVL7	257.725	0.674735	0.351959	1.91708	0.0552272	0.414544	ELOVL fatty acid elongase 7
ENSG00000124784	RIOK1	1228.3	-0.633913	0.330693	-1.91692	0.0552475	0.414544	RIO kinase 1
ENSG00000157111	TMEM171	208.353	-0.737921	0.38516	-1.91588	0.0553798	0.415319	transmembrane protein 171
ENSG00000277758	SYT15B	14.0633	2.66031	1.38966	1.91436	0.0555744	0.416561	synaptotagmin 15B
ENSG00000123064	DDX54	2208.45	-0.533756	0.278907	-1.91374	0.055653	0.416816	DEAD-box helicase 54
ENSG00000263956	NBPF11	134.889	-0.92131	0.481445	-1.91364	0.0556667	0.416816	NBPF member 11
ENSG00000163661	PTX3	1088.48	-0.518248	0.270953	-1.91268	0.0557886	0.417511	pentraxin 3
ENSG00000153246	PLA2R1	21.177	2.05244	1.07385	1.9113	0.0559658	0.418528	phospholipase A2 receptor 1
ENSG00000171444	MCC	258.259	0.736268	0.385245	1.91117	0.0559829	0.418528	MCC regulator of WNT signaling pathway
ENSG00000166272	WBP1L	1485.68	0.473257	0.247696	1.91063	0.0560518	0.418824	WW domain binding protein 1 like
ENSG00000127124	HIVEP3	354.249	-0.63161	0.330703	-1.9099	0.0561463	0.419048	HIVEP zinc finger 3
NA	LOC101928453	24.4882	2.17853	1.14075	1.90973	0.0561684	0.419048	uncharacterized LOC101928453
ENSG00000103126	AXIN1	553.172	-0.558776	0.292596	-1.90972	0.0561695	0.419048	axin 1
ENSG00000107831	FGF8	7.36239	3.74683	1.96287	1.90885	0.056281	0.419661	fibroblast growth factor 8
ENSG00000135423	GLS2	28.2808	-1.68502	0.88291	-1.90849	0.0563285	0.419797	glutaminase 2
ENSG00000164211	STARD4	902.141	0.504273	0.264267	1.90819	0.0563661	0.419859	StAR related lipid transfer domain containing 4
ENSG00000138376	BARD1	711.666	0.548174	0.287359	1.90763	0.0564397	0.420188	BRCA1 associated RING domain 1
ENSG00000197776	KLHDC1	51.2225	1.33468	0.699931	1.90687	0.0565373	0.420696	kelch domain containing 1
ENSG00000168653	NDUFS5	2700.96	-0.447967	0.235206	-1.90457	0.0568363	0.422214	NADH:ubiquinone oxidoreductase subunit S5
ENSG00000154803	FLCN	637.892	0.53431	0.280643	1.90388	0.0569262	0.422214	folliculin
ENSG00000248098	BCKDHA	313.9	0.758157	0.398229	1.90382	0.0569338	0.422214	branched chain keto acid dehydrogenase E1 subunit alpha
ENSG00000125821	DTD1	1274.16	-0.51148	0.26867	-1.90375	0.0569431	0.422214	D-aminoacyl-tRNA deacylase 1
ENSG00000136270	TBRG4	1695.7	-0.555418	0.291813	-1.90333	0.0569969	0.422214	transforming growth factor beta regulator 4
ENSG00000068654	POLR1A	1854.82	-0.615904	0.323645	-1.90302	0.0570375	0.422214	RNA polymerase I subunit A
ENSG00000140365	COMMD4	655.467	-0.527167	0.27702	-1.90299	0.0570414	0.422214	COMM domain containing 4
ENSG00000290292	HOMEZ	6.78194	-4.04598	2.12627	-1.90285	0.0570596	0.422214	homeobox and leucine zipper encoding
ENSG00000180185	FAHD1	288.267	-0.685072	0.360063	-1.90265	0.0570869	0.422214	fumarylacetoacetate hydrolase domain containing 1
ENSG00000176903	PNMA1	1261.75	-0.518133	0.272325	-1.90263	0.0570895	0.422214	PNMA family member 1
ENSG00000189171	S100A13	1001.98	0.57639	0.302997	1.9023	0.0571323	0.422214	S100 calcium binding protein A13
ENSG00000174928	C3orf33	85.8128	1.01187	0.531946	1.90221	0.0571443	0.422214	chromosome 3 open reading frame 33
ENSG00000115616	SLC9A2	7.83418	-3.14604	1.65415	-1.9019	0.0571838	0.422214	solute carrier family 9 member A2
ENSG00000125266	EFNB2	858.525	0.54896	0.28866	1.90175	0.0572037	0.422214	ephrin B2
ENSG00000172922	RNASEH2C	660.222	-0.566747	0.298029	-1.90165	0.0572167	0.422214	ribonuclease H2 subunit C
ENSG00000137764	MAP2K5	207.607	-0.711008	0.373913	-1.90153	0.057232	0.422214	mitogen-activated protein kinase kinase 5
ENSG00000198258	UBL5	2206.85	-0.451173	0.237278	-1.90146	0.0572424	0.422214	ubiquitin like 5
ENSG00000139826	ABHD13	608.27	0.538576	0.283288	1.90116	0.0572812	0.422283	abhydrolase domain containing 13
ENSG00000146063	TRIM41	756.382	-0.557283	0.293182	-1.90081	0.057327	0.422403	tripartite motif containing 41
ENSG00000152926	ZNF117	64.1446	1.40688	0.740352	1.90028	0.0573958	0.422572	zinc finger protein 117
NA	FRG1EP	18.3034	-2.05845	1.08336	-1.90007	0.0574238	0.422572	FSHD region gene 1 family member E	pseudogene
ENSG00000112245	PTP4A1	3570.98	-0.533025	0.280549	-1.89994	0.0574415	0.422572	protein tyrosine phosphatase 4A1
ENSG00000115520	COQ10B	491.718	0.614843	0.323681	1.89953	0.0574945	0.422572	coenzyme Q10B
ENSG00000062524	LTK	30.3212	1.83774	0.967552	1.89937	0.0575163	0.422572	leukocyte receptor tyrosine kinase
ENSG00000187017	ESPN	19.0253	2.02299	1.06513	1.89929	0.0575269	0.422572	espin
ENSG00000225684	FAM225B	6.34877	-3.90101	2.05477	-1.89851	0.0576287	0.423102	family with sequence similarity 225 member B
ENSG00000134202	GSTM3	423.909	0.587596	0.309559	1.89817	0.0576738	0.423217	glutathione S-transferase mu 3
ENSG00000099284	MACROH2A2	5.77385	4.24917	2.23912	1.8977	0.0577356	0.423454	macroH2A.2 histone
ENSG00000124222	STX16	823.396	0.645668	0.340359	1.89702	0.0578249	0.423892	syntaxin 16
ENSG00000112685	EXOC2	2053.8	-0.459947	0.242559	-1.89623	0.0579298	0.424391	exocyst complex component 2
ENSG00000169359	SLC33A1	615.159	0.550279	0.290259	1.89582	0.057984	0.424391	solute carrier family 33 member 1
ENSG00000161904	LEMD2	845.749	-0.508758	0.268373	-1.89571	0.0579979	0.424391	LEM domain nuclear envelope protein 2
ENSG00000106346	USP42	291.725	-0.672316	0.35467	-1.89561	0.0580115	0.424391	ubiquitin specific peptidase 42
ENSG00000112699	GMDS	501.772	-0.611545	0.322672	-1.89525	0.0580588	0.424519	GDP-mannose 4	6-dehydratase
ENSG00000181523	SGSH	327.755	-0.649725	0.342909	-1.89474	0.0581264	0.424797	N-sulfoglucosamine sulfohydrolase
ENSG00000181135	ZNF707	19.1593	-2.01209	1.06209	-1.89446	0.0581643	0.424857	zinc finger protein 707
ENSG00000165322	ARHGAP12	1047.82	0.591926	0.312562	1.89379	0.0582531	0.425075	Rho GTPase activating protein 12
ENSG00000162415	ZSWIM5	15.1506	-2.45119	1.29433	-1.89379	0.0582534	0.425075	zinc finger SWIM-type containing 5
ENSG00000116337	AMPD2	877.088	0.521592	0.275503	1.89324	0.0583264	0.425391	adenosine monophosphate deaminase 2
NA	RAB30-DT	139.668	0.828082	0.437741	1.89172	0.0585289	0.426597	RAB30 divergent transcript
ENSG00000189369	GSPT2	64.4093	1.13813	0.601694	1.89155	0.0585514	0.426597	G1 to S phase transition 2
ENSG00000126778	SIX1	866.959	-0.517447	0.273709	-1.8905	0.0586912	0.427289	SIX homeobox 1
ENSG00000257923	CUX1	1877.43	0.458632	0.242613	1.89039	0.0587061	0.427289	cut like homeobox 1
ENSG00000152705	CATSPER3	10.8416	-2.73847	1.44966	-1.88904	0.0588864	0.428384	cation channel sperm associated 3
ENSG00000223960	CHROMR	128.456	0.942541	0.499015	1.8888	0.0589183	0.428399	cholesterol induced regulator of metabolism RNA
ENSG00000158352	SHROOM4	8.71018	-3.35176	1.77485	-1.88848	0.0589621	0.428455	shroom family member 4
ENSG00000114439	BBX	2703.63	0.579037	0.306671	1.88814	0.0590077	0.428455	BBX high mobility group box domain containing
NA	MTRNR2L8	34.9832	1.54301	0.817248	1.88806	0.0590177	0.428455	MT-RNR2 like 8 (pseudogene)
ENSG00000138621	PPCDC	147.439	-0.844497	0.44738	-1.88765	0.059073	0.428455	phosphopantothenoylcysteine decarboxylase
ENSG00000272143	FGF14-AS2	7.19396	3.71142	1.96618	1.88763	0.0590763	0.428455	FGF14 antisense RNA 2
ENSG00000136197	C7orf25	199.409	0.731835	0.387746	1.88741	0.0591055	0.428455	chromosome 7 open reading frame 25
ENSG00000089159	PXN	6863.01	0.449325	0.23824	1.88602	0.0592919	0.429589	paxillin
ENSG00000154493	C10orf90	8.85768	3.41007	1.80835	1.88574	0.0593304	0.429651	chromosome 10 open reading frame 90
ENSG00000140323	DISP2	104.93	0.966987	0.513024	1.88488	0.0594463	0.430078	dispatched RND transporter family member 2
ENSG00000156869	FRRS1	63.4337	1.15787	0.614304	1.88485	0.0594494	0.430078	ferric chelate reductase 1
ENSG00000165684	SNAPC4	402.318	-0.597151	0.31708	-1.88328	0.0596621	0.431398	small nuclear RNA activating complex polypeptide 4
ENSG00000169609	C15orf40	200.637	-0.800172	0.42529	-1.88147	0.0599075	0.432752	chromosome 15 open reading frame 40
ENSG00000183617	MRPL54	363.846	-0.613094	0.325861	-1.88146	0.0599098	0.432752	mitochondrial ribosomal protein L54
ENSG00000088832	FKBP1A	6705.17	0.430648	0.22901	1.88047	0.0600435	0.433499	FKBP prolyl isomerase 1A
ENSG00000172572	PDE3A	10.7869	2.97034	1.5801	1.87984	0.0601299	0.433904	phosphodiesterase 3A
ENSG00000172534	HCFC1	1589.57	-0.508303	0.270485	-1.87923	0.0602132	0.434287	host cell factor C1
ENSG00000032389	EIPR1	689.504	0.530449	0.282421	1.87822	0.0603509	0.435061	EARP complex and GARP complex interacting protein 1
NA	NA	152.119	0.825316	0.43967	1.87713	0.0605008	0.435922	NA
ENSG00000071655	MBD3	1425.04	-0.543873	0.289901	-1.87607	0.0606458	0.436724	methyl-CpG binding domain protein 3
ENSG00000012174	MBTPS2	272.216	0.650401	0.346736	1.87578	0.0606851	0.436724	membrane bound transcription factor peptidase	site 2
ENSG00000085721	RRN3	36.9939	-1.93845	1.03348	-1.87565	0.0607035	0.436724	RRN3 homolog	RNA polymerase I transcription factor
ENSG00000180777	ANKRD30B	11.3171	-3.04561	1.62403	-1.87535	0.0607451	0.436803	ankyrin repeat domain 30B
ENSG00000263711	LINC02864	162.061	0.844827	0.450556	1.87508	0.0607821	0.43685	long intergenic non-protein coding RNA 2864
ENSG00000050405	LIMA1	3022.66	-0.462321	0.24667	-1.87425	0.0608955	0.43725	LIM domain and actin binding 1
ENSG00000064601	CTSA	1840.73	-0.498294	0.265866	-1.87423	0.0608988	0.43725	cathepsin A
ENSG00000174989	FBXW8	872.112	-0.514003	0.274387	-1.87328	0.0610299	0.437972	F-box and WD repeat domain containing 8
ENSG00000144741	SLC25A26	328.302	-0.649323	0.346803	-1.87231	0.0611636	0.438515	solute carrier family 25 member 26
ENSG00000054219	LY75	10.6348	2.75911	1.47413	1.87169	0.0612494	0.438515	lymphocyte antigen 75
ENSG00000028310	BRD9	1223.37	-0.579427	0.309634	-1.87133	0.0612995	0.438515	bromodomain containing 9
[truncated: 26,396 more rows]
